# Supplementary material
Source: publisher figshare collection journal article supplement (https://acs.figshare.com/ndownloader/files/4614967)

# Sonogashira Couplings of Aryl Bromides: Room Temperature, Water Only, No Copper

Bruce H. Lipshutz\*, David W. Chung, and Brian Rich

*Department of Chemistry and Biochemistry, University of California, Santa Barbara, CA 93106*

[lipshutz@chem.ucsb.edu](mailto:lipshutz@chem.ucsb.edu)

## Supporting Information

### Table of Contents

|                                                                      |               |
|----------------------------------------------------------------------|---------------|
| General Information                                                  | S-1           |
| Preparation of 3 wt % PTS aqueous solutions                          | S-2           |
| Synthesis and Characterization of:                                   |               |
| 6-Acetoxy-1-hexyne                                                   | S-2           |
| <i>N</i> -(3'-Bromophenyl)-2,4-Dichlorobenzamide                     | S-2           |
| Standard Procedures for Sonogashira couplings                        | S-3, S-4, S-6 |
| Synthesis and Characterization of:                                   |               |
| Diphenylacetylene                                                    | S-3           |
| Products in Table 1                                                  | S-3 – S-6     |
| Products in Table 2                                                  | S-6           |
| Products in Table 3                                                  | S-7           |
| 2,4-Dichloro- <i>N</i> -(3'-(11-hydroxyundec-1-ynyl)phenyl)benzamide | S-8           |
| References                                                           | S-9           |
| <sup>1</sup> H and <sup>13</sup> C NMR Spectra                       | S-10 – S-29   |

**General Information.** Reactions were performed in oven-dried glassware containing a Teflon coated stir bar and septum. Pd(dtbpf)Cl<sub>2</sub> (CAS# 95408-45-0) was generously supplied by Johnson Matthey, Neolyst™ CX31 (CAS# 884879-23-6) from Umicore AG & Co. KG., phosphine ligands **12-14** from Takasago, and PTS from Zymes, LLC. These and all other commercially available reagents were used without further purification, except for: Et<sub>3</sub>N and CH<sub>2</sub>Cl<sub>2</sub> which were distilled from CaH<sub>2</sub> prior to use. Water (HPLC grade) was purchased from Acros and degassed by sparging with argon prior to use. For TLC analyses Kieselgel 60 F<sub>254</sub> pre-coated silica gel plates (Merck, 0.25 mm thick) were used; and for silica gel chromatography Silia Flash® P60 (SiliCycle, 40-63 µm) was used. GC analyses were performed using Hewlett-Packard HP5890 (with a Restek RTX-1 capillary column) and/or Hewlett-Packard HP6890 (with an Agilent Technologies HP-1 capillary column) gas chromatographs. <sup>1</sup>H and <sup>13</sup>C NMR spectra were obtained using a Varian UNITY INOVA 400 MHz NMR spectrometer. High-resolution mass spectral analyses were obtained using a VG70 double-focusing magnetic sector instrument (VG Analytical) for EI and a PE Sciex QStar Pulsar quadrupole/TOF instrument (API) for ESI. Melting points were measured using a Laboratory Devices, USA MEL-TEMP II melting point apparatus and are uncorrected.

**Preparation of a degassed 3 wt % PTS aqueous solution.** To a 50 mL round-bottom flask was added PTS (4.0 g), degassed on a high-vacuum manifold, and back-flushed with argon. Degassed water (36.0 mL) was added via syringe and the contents of the flask were swirled with periodic heating (via heat gun) until a clear, homogeneous solution was afforded (~5-10 min). This stock solution of 10 wt % PTS (0.3 mL) was diluted with *degassed* water (0.7 mL) to give the 3 wt % aqueous PTS solution (1.0 mL) that was used in each experiment.

**Preparation of a non-degassed 3 wt % PTS aqueous solution.** Same procedure as with the *degassed* PTS solution except the PTS was not degassed and *non-degassed* water was added. The *non-degassed* PTS solution was stored under argon.

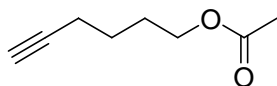

**6-Acetoxy-1-hexyne.** In a 5 mL round-bottom equipped with a stir bar under argon, Ac<sub>2</sub>O (1.0 mL, 10.6 mmol) was added via syringe to a stirring solution of 5-hexyn-1-ol (1.0 mL, 9.07 mmol) and pyridine (860 µL, 10.6 mmol) in CH<sub>2</sub>Cl<sub>2</sub> (5.0 mL) and the reaction was allowed to stir at rt. Reaction progress was monitored by GC. After 26 h the mixture was diluted with CH<sub>2</sub>Cl<sub>2</sub>, washed with water (2x), and the combined aqueous layers were back extracted with CH<sub>2</sub>Cl<sub>2</sub> to afford a crude orange liquid after drying over anhydrous Na<sub>2</sub>SO<sub>4</sub> and concentration by rotary evaporation. Kugelrohr distillation (0.1 mm Hg, 90-105 °C) of the crude material provided the titled product (1.01 g, 79%) as a clear colorless liquid; <sup>1</sup>H NMR (400 MHz, CDCl<sub>3</sub>) matches previously reported spectra data.<sup>1</sup>

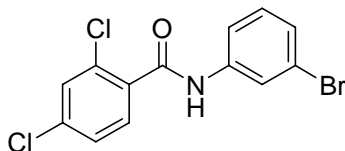

**N-(3'-Bromophenyl)-2,4-dichlorobenzamide (15; Scheme 4).** In a 25 mL round-bottom flask equipped with a stir bar under argon at 0 °C, 3,5-dichlorobenzoyl chloride (520 µL, 3.71 mmol) was

added via syringe to a stirring solution of 3-bromoaniline (400  $\mu$ L, 3.67 mmol) and Et<sub>3</sub>N (1.0 mL, 7.18 mmol) in CH<sub>2</sub>Cl<sub>2</sub> (7.0 mL) and the reaction was allowed to stir while gradually warming to rt. Reaction progress was monitored by TLC. After 35 min, the mixture was diluted with CH<sub>2</sub>Cl<sub>2</sub> and washed with water (3x), the organic layer was dried over anhydrous Na<sub>2</sub>SO<sub>4</sub> and concentrated by rotary evaporation. The crude material was purified by silica gel chromatography (eluent: gradient from hexanes to 8% ethyl acetate/hexanes) to afford the titled product (1.16 g, 92%) as a white solid; mp 125-127 °C; <sup>1</sup>H NMR (400 MHz, CDCl<sub>3</sub>)  $\delta$  7.94 (brs, 1H), 7.90 (s, 1H), 7.73 (d, *J* = 8.4 Hz, 1H), 7.54 (d, *J* = 8.0 Hz, 1H), 7.49 (d, *J* = 2.0 Hz, 1H), 7.38 (dd, *J* = 8.4, 2.0 Hz, 1H), 7.32 (dt, *J* = 8.4, 1.2 Hz, 1H), 7.24 (d, *J* = 8.0 Hz, 1H); <sup>13</sup>C NMR (100 MHz, CDCl<sub>3</sub>)  $\delta$  163.71, 138.71, 137.74, 133.18, 131.66 (2C), 130.65, 130.45, 128.26, 128.02, 123.27, 122.98, 118.80; HRESI-MS *m/z* Calcd. for C<sub>13</sub>H<sub>8</sub>BrCl<sub>2</sub>NO ([M+Na]<sup>+</sup>) 365.9058, found 365.9042.

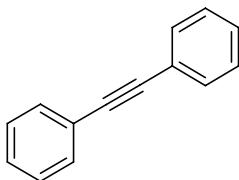

**Standard Procedure A for Sonogashira Coupling: Diphenylacetylene (Scheme 2).** To a 5 mL round-bottom flask equipped with a stir bar was added under argon Pd(CH<sub>3</sub>CN)<sub>2</sub>Cl<sub>2</sub> (1.3 mg, 0.005 mmol), X-Phos (5.8 mg, 0.012 mmol), and Cs<sub>2</sub>CO<sub>3</sub> (543 mg, 1.66 mmol). Under a positive flow of argon were added via syringe first, *degassed* PTS solution (1.0 mL, 3 wt %), then bromobenzene (50.0  $\mu$ L, 0.48 mmol), and then phenylacetylene (60.0  $\mu$ L, 0.55 mmol). A milky, tan-colored mixture developed over 3 h while stirring at rt. Reaction progress was monitored by GC. After 4.5 h the mixture was diluted with brine and extracted with ethyl acetate (4x). The combined organic extracts was dried over anhydrous Na<sub>2</sub>SO<sub>4</sub>, filtered, and concentrated by rotary evaporation to give a crude brown oil. Purification by silica gel chromatography eluting with hexanes afforded the titled product (70 mg, 83%) as a light yellow solid; mp 58-60 °C; <sup>1</sup>H NMR (400 MHz, CDCl<sub>3</sub>) matches previously reported spectra data.<sup>2</sup>

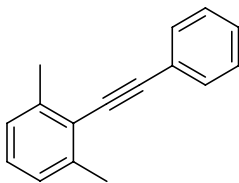

**2,6-Dimethylphenylphenylacetylene (Table 1, entry 1a).** Following standard procedure A, using Pd(CH<sub>3</sub>CN)<sub>2</sub>Cl<sub>2</sub> (1.5 mg, 0.006 mmol), X-Phos (6.4 mg, 0.013 mmol), Cs<sub>2</sub>CO<sub>3</sub> (601 mg, 1.84 mmol), 2-bromo-*m*-xylene (70  $\mu$ L, 0.52 mmol), phenylacetylene (90  $\mu$ L, 0.82 mmol), and *degassed* PTS (1.0 mL, 3 wt %) for 20 h, the titled product (107 mg, 99%) was obtained as a colorless oil after silica gel chromatography (eluent: hexanes); <sup>1</sup>H NMR (400 MHz, CDCl<sub>3</sub>) matches previously reported spectra data.<sup>3</sup>

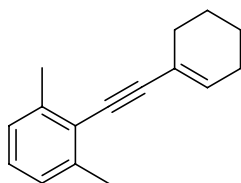

**Standard Procedure B for Sonogashira Coupling: 2-(cyclohex-1-enylethynyl)-1,3-dimethylbenzene (Table 1, entry 1b).** To a 5 mL round-bottom flask equipped with a stir bar was added under argon Pd(CH<sub>3</sub>CN)<sub>2</sub>Cl<sub>2</sub> (1.8 mg, 0.007 mmol) and X-Phos (6.9 mg, 0.014 mmol). Under a positive flow of argon were added via syringe, first *degassed* PTS solution (1.0 mL, 3 wt %), then Et<sub>3</sub>N (150 μL, 1.08 mmol), then 2-bromo-*m*-xylene (70 μL, 0.52 mmol), and finally 1-ethynylcyclohexene (100 μL, 0.85 mmol). A milky brown mixture developed over 20 min while stirring at rt. Reaction progress was monitored by GC. After 23 h the mixture was diluted with brine and extracted with ethyl acetate (4x). The combined organic extracts was dried over anhydrous Na<sub>2</sub>SO<sub>4</sub>, filtered, and concentrated by rotary evaporation to give a crude brown oil that was purified by silica gel chromatography eluting with hexanes afforded the titled product (110 mg, quant) as a colorless oil; <sup>1</sup>H NMR (400 MHz, CDCl<sub>3</sub>) matches previously reported spectra data.<sup>4</sup>

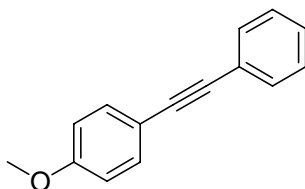

**4-(Phenylethynyl)-anisole (Table 1, entry 2a).** Following standard procedure A, using Pd(CH<sub>3</sub>CN)<sub>2</sub>Cl<sub>2</sub> (1.5 mg, 0.006 mmol), X-Phos (7.0 mg, 0.015 mmol), Cs<sub>2</sub>CO<sub>3</sub> (548 mg, 1.68 mmol), 4-bromoanisole (60 μL, 0.48 mmol), phenylacetylene (70 μL, 0.64 mmol), and *degassed* PTS (1.0 mL, 3 wt %) for 20 h, the titled product (89 mg, 89%) was obtained as a yellow-tan solid after silica gel chromatography (eluent: hexanes); mp 57-59 °C; <sup>1</sup>H NMR (400 MHz, CDCl<sub>3</sub>) matches previously reported spectra data.<sup>2</sup>

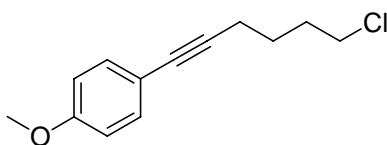

**4-(6-Chlorohex-1-ynyl)-anisole (Table 1, entry 2b).** Following standard procedure B, using Pd(CH<sub>3</sub>CN)<sub>2</sub>Cl<sub>2</sub> (1.3 mg, 0.005 mmol), X-Phos (6.0 mg, 0.012 mmol), Et<sub>3</sub>N (140 μL, 1.00 mmol), 4-bromoanisole (60 μL, 0.48 mmol), 6-chloro-1-hexyne (90 μL, 0.74 mmol), and *degassed* PTS (1.0 mL, 3 wt %) for 25 h, the titled product (59 mg, 55%) was obtained as a yellow oil after silica gel chromatography (eluent: hexanes); <sup>1</sup>H NMR (400 MHz, CDCl<sub>3</sub>) δ 7.34 (d, *J* = 8.8 Hz, 2H), 6.82 (d, *J* = 8.8 Hz, 2H), 3.81 (s, 3H), 3.62 (t, *J* = 6.6 Hz, 2H), 2.46 (t, *J* = 7.0 Hz, 2H), 2.01-1.94 (m, 2H), 1.80-1.72 (m, 2H); <sup>13</sup>C NMR (100 MHz, CDCl<sub>3</sub>) δ 159.29, 133.08, 116.09, 114.02, 87.84, 81.10, 55.46, 44.86, 31.83, 26.17, 18.92; HREI-MS *m/z* Calcd. for C<sub>13</sub>H<sub>15</sub>ClO (M<sup>+</sup>) 222.0811, found 222.0811.

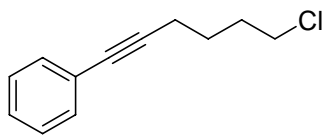

**6-Chloro-1-phenylhex-1-yne (Table 1, entry 3).** Following standard procedure B, using  $\text{Pd}(\text{CH}_3\text{CN})_2\text{Cl}_2$  (1.3 mg, 0.005 mmol), X-Phos (6.2 mg, 0.013 mmol),  $\text{Et}_3\text{N}$  (140  $\mu\text{L}$ , 1.00 mmol), bromobenzene (50  $\mu\text{L}$ , 0.48 mmol), 6-chloro-1-hexyne (90  $\mu\text{L}$ , 0.74 mmol), and *degassed* PTS (1.0 mL, 3 wt %) for 20 h, the titled product (75 mg, 82%) was obtained as a colorless oil after silica gel chromatography (eluent: hexanes);  $^1\text{H}$  NMR (400 MHz,  $\text{CDCl}_3$ ) matches previously reported spectra data.<sup>5</sup>

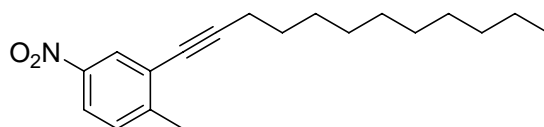

**2-(Dodec-1-ynyl)-4-nitrotoluene (Table 1, entry 4).** Following standard procedure B, using  $\text{Pd}(\text{CH}_3\text{CN})_2\text{Cl}_2$  (1.6 mg, 0.006 mmol), X-Phos (6.4 mg, 0.013 mmol),  $\text{Et}_3\text{N}$  (150  $\mu\text{L}$ , 1.08 mmol), 2-bromo-4-nitrotoluene (109 mg, 0.50 mmol), 1-dodecyne (140  $\mu\text{L}$ , 0.65 mmol), and *degassed* PTS (1.0 mL, 3 wt %) for 18 h, the titled product (150 mg, 99%) was obtained as a yellow oil after silica gel chromatography (eluent: hexanes);  $^1\text{H}$  NMR (400 MHz,  $\text{CDCl}_3$ )  $\delta$  8.20 (d,  $J$  = 2.4 Hz, 1H), 8.00 (dd,  $J$  = 8.4, 2.4 Hz, 1H), 7.32 (d,  $J$  = 8.8 Hz, 1H), 2.50 (s, 3H), 2.47 (t,  $J$  = 7.2 Hz, 2H), 1.67-1.60 (m, 2H), 1.49-1.44 (m, 2H), 1.32-1.28 (m, 12H), 0.88 (t,  $J$  = 7.0 Hz, 3H);  $^{13}\text{C}$  NMR (100 MHz,  $\text{CDCl}_3$ )  $\delta$  147.75, 146.15, 130.19, 126.82, 125.62, 122.30, 97.60, 77.77, 32.11, 29.79, 29.74, 29.53, 29.34, 29.12, 28.80, 22.90, 21.26, 19.69, 14.33; HREI-MS  $m/z$  Calcd. for  $\text{C}_{19}\text{H}_{27}\text{NO}_2$  ( $\text{M}^+$ ) 301.2042, found 301.2051.

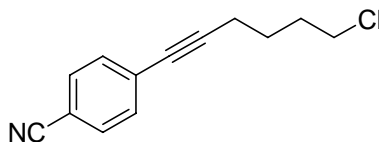

**4-(6-Chlorohex-1-ynyl)benzonitrile (Table 1, entry 5a).** Following standard procedure A, using  $\text{Pd}(\text{CH}_3\text{CN})_2\text{Cl}_2$  (1.3 mg, 0.005 mmol), X-Phos (6.6 mg, 0.014 mmol),  $\text{Cs}_2\text{CO}_3$  (574 mg, 1.76 mmol), 4-bromobenzonitrile (92 mg, 0.51 mmol), 6-chloro-1-hexyne (90  $\mu\text{L}$ , 0.74 mmol), and *degassed* PTS (1.0 mL, 3 wt %) for 6 h, the titled product (102 mg, 93%) was obtained as a light yellow oil after silica gel chromatography (eluent: hexanes);  $^1\text{H}$  NMR (400 MHz,  $\text{CDCl}_3$ )  $\delta$  7.58 (d,  $J$  = 8.4 Hz, 2H), 7.46 (d,  $J$  = 8.4 Hz, 2H), 3.61 (t,  $J$  = 6.6 Hz, 2H), 2.50 (t,  $J$  = 7.0 Hz, 2H), 1.99-1.92 (m, 2H), 1.82-1.75 (m, 2H);  $^{13}\text{C}$  NMR (100 MHz,  $\text{CDCl}_3$ )  $\delta$  132.29, 132.14, 128.97, 118.80, 111.16, 94.61, 80.17, 44.63, 31.77, 25.78, 19.03; HREI-MS  $m/z$  Calcd. for  $\text{C}_{13}\text{H}_{12}\text{ClN}$  ( $\text{M}^+$ ) 217.0658, found 217.0668.

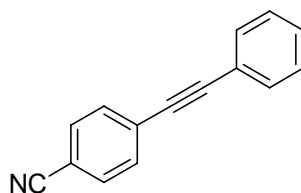

**4-(Phenylethynyl)benzonitrile (Table 1, entry 5b).** Following standard procedure A, using  $\text{Pd}(\text{CH}_3\text{CN})_2\text{Cl}_2$  (1.5 mg, 0.006 mmol), X-Phos (6.6 mg, 0.014 mmol),  $\text{Cs}_2\text{CO}_3$  (574 mg, 1.76 mmol), 4-

bromobenzonitrile (92 mg, 0.51 mmol), phenylacetylene (80  $\mu$ L, 0.73 mmol), and *degassed* PTS (1.0 mL, 3 wt %) for 4 h, the titled product (100 mg, 97%) was obtained as a light yellow solid after silica gel chromatography (eluent: gradient from hexanes to 1% diethyl ether/hexanes); mp 102-104  $^{\circ}$ C;  $^1$ H NMR (400 MHz,  $\text{CDCl}_3$ ) matches previously reported spectra data.<sup>3</sup>

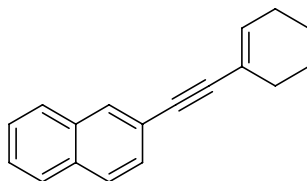

**2-(Cyclohex-1-enylethynyl)naphthalene (Table 1, entry 6).** Following standard procedure B, using  $\text{Pd}(\text{CH}_3\text{CN})_2\text{Cl}_2$  (1.3 mg, 0.005 mmol), X-Phos (6.9 mg, 0.014 mmol),  $\text{Et}_3\text{N}$  (150  $\mu$ L, 1.08 mmol), 2-bromonaphthalene (103 mg, 0.50 mmol), 1-ethynylcyclohexene (100  $\mu$ L, 0.85 mmol), and *degassed* PTS (1.0 mL, 3 wt %) for 21 h, the titled product (97 mg, 84%) was obtained as an off-white solid after silica gel chromatography (eluent: hexanes); mp 45-47  $^{\circ}$ C;  $^1$ H NMR (400 MHz,  $\text{CDCl}_3$ )  $\delta$  7.95 (s, 1H), 7.82-7.76 (m, 3H), 7.50-7.45 (m, 3H), 6.28 (m, 1H), 2.30-2.26 (m, 2H), 2.21-2.16 (m, 2H), 1.75-1.62 (m, 4H);  $^{13}\text{C}$  NMR (100 MHz,  $\text{CDCl}_3$ )  $\delta$  135.65, 133.24, 132.74, 131.22, 128.73, 128.04, 127.92, 127.89, 126.62, 126.58, 121.27, 120.95, 91.86, 87.38, 29.46, 26.03, 22.56, 21.73; HREI-MS  $m/z$  Calcd. for  $\text{C}_{18}\text{H}_{16}$  ( $\text{M}^+$ ) 232.1252, found 232.1252.

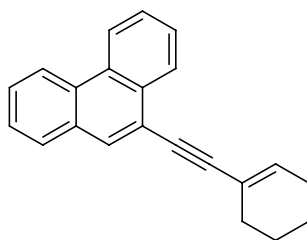

**9-(Cyclohex-1-enylethynyl)phenanthrene (Table 1, entry 7).** Following standard procedure B, using  $\text{Pd}(\text{CH}_3\text{CN})_2\text{Cl}_2$  (2.0 mg, 0.008 mmol), X-Phos (10.0 mg, 0.021 mmol),  $\text{Et}_3\text{N}$  (150  $\mu$ L, 1.08 mmol), 9-bromophenanthrene (129 mg, 0.50 mmol), 1-ethynylcyclohexene (100  $\mu$ L, 0.85 mmol), and *degassed* PTS (1.0 mL, 3 wt %) for 21 h, the titled product (133 mg, 98%) was obtained as a bright yellow solid after silica gel chromatography (eluent: hexanes); mp 105-107  $^{\circ}$ C;  $^1$ H NMR (400 MHz,  $\text{CDCl}_3$ )  $\delta$  8.70-8.65 (m, 2H), 8.47-8.44 (m, 1H), 7.98 (s, 1H), 7.85 (d,  $J$  = 7.2 Hz, 1H), 7.72-7.58 (m, 4H), 6.39 (m, 1H), 2.39 (m, 2H), 2.23 (m, 2H), 1.80-1.68 (m, 4H);  $^{13}\text{C}$  NMR (100 MHz,  $\text{CDCl}_3$ )  $\delta$  135.79, 131.56, 131.41, 130.26, 128.64, 127.36, 127.20, 127.14, 127.07, 122.90, 122.77, 121.10, 120.31, 96.20, 85.25, 29.59, 26.07, 22.59, 21.76; HREI-MS  $m/z$  Calcd. for  $\text{C}_{22}\text{H}_{18}$  ( $\text{M}^+$ ) 282.1408, found 282.1417.

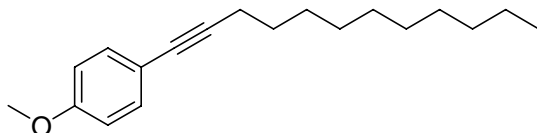

**Standard Procedure C for Sonogashira Coupling: 4-(dodec-1-ynyl)-anisole (Table 2).** To a 5 mL round-bottom flask equipped with a stir bar was added under argon  $\text{Pd}(\text{OAc})_2$  (1.4 mg, 0.006 mmol) and **14** (4.1 mg, 0.012 mmol). Under a positive flow of argon were each added via syringe first *non-degassed* PTS solution (1.0 mL, 3 wt %), then  $\text{Et}_3\text{N}$  (200  $\mu$ L, 1.44 mmol), 4-bromoanisole (60  $\mu$ L, 0.48 mmol), and 1-dodecyne (160  $\mu$ L, 0.74 mmol). A milky, tan-colored mixture developed over 30 min

while stirring at rt. Reaction progress was monitored by GC. After 10 h the mixture was diluted with brine and extracted with ethyl acetate (4x). The combined organic extracts were dried over anhydrous  $\text{Na}_2\text{SO}_4$ , filtered, and concentrated by rotary evaporation to give a crude brown oil that was purified by silica gel chromatography eluting with hexanes afforded the titled product (125 mg, 96%) as a light yellow oil;  $^1\text{H}$  NMR (400 MHz,  $\text{CDCl}_3$ )  $\delta$  7.34 (d,  $J$  = 8.8 Hz, 2H), 6.82 (d,  $J$  = 8.8 Hz, 2H), 3.81 (s, 3H), 2.39 (t,  $J$  = 7.0 Hz, 2H), 1.64-1.57 (m, 2H), 1.45 (m, 2H), 1.29 (brs, 12H), 0.90 (t,  $J$  = 6.8 Hz, 3H);  $^{13}\text{C}$  NMR (100 MHz,  $\text{CDCl}_3$ )  $\delta$  159.14, 133.04, 116.45, 113.96, 89.03, 80.40, 55.43, 32.14, 29.81, 29.78, 29.56, 29.40, 29.16, 29.09, 22.91, 19.62, 14.35; HREI-MS  $m/z$  Calcd. for  $\text{C}_{19}\text{H}_{28}\text{O}$  ( $\text{M}^+$ ) 272.2140, found 272.2138.

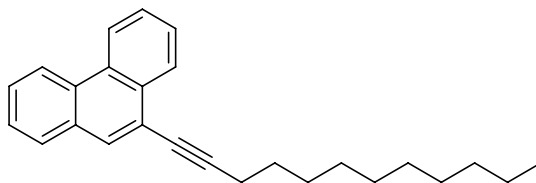

**9-(Dodec-1-ynyl)phenanthrene (Scheme 3).** Following standard procedure C, using  $\text{Pd}(\text{OAc})_2$  (1.7 mg, 0.008 mmol), **14** (7.2 mg, 0.020 mmol),  $\text{Et}_3\text{N}$  (200  $\mu\text{L}$ , 1.44 mmol), 9-bromophenanthrene (128 mg, 0.50 mmol), 1-dodecyne (160  $\mu\text{L}$ , 0.74 mmol), and *degassed* PTS (1.0 mL, 3 wt %) for 4 h, the titled product (140 mg, 82%) was obtained as a light yellow solid after silica gel chromatography (eluent: hexanes); mp 40-42  $^\circ\text{C}$ ;  $^1\text{H}$  NMR (400 MHz,  $\text{CDCl}_3$ )  $\delta$  8.70-8.65 (m, 2H), 8.49-8.46 (m, 1H), 7.95 (s, 1H), 7.84 (dd,  $J$  = 8.0, 1.2 Hz, 1H), 7.72-7.57 (m, 4H), 2.61 (t,  $J$  = 7.2 Hz, 2H), 1.79-1.72 (m, 2H), 1.61-1.54 (m, 2H), 1.39-1.30 (m, 12H), 0.90 (t,  $J$  = 6.8 Hz, 3H);  $^{13}\text{C}$  NMR (100 MHz,  $\text{CDCl}_3$ )  $\delta$  131.74, 131.59, 131.38, 130.28, 130.13, 128.51, 127.22 (2C), 127.07, 127.03, 122.89, 122.76, 120.66, 95.49, 78.91, 32.14, 29.81 (2C), 29.58, 29.43, 29.29, 29.13, 22.92, 19.98, 14.35; HREI-MS  $m/z$  Calcd. for  $\text{C}_{26}\text{H}_{30}$  ( $\text{M}^+$ ) 342.2348, found 342.2354.

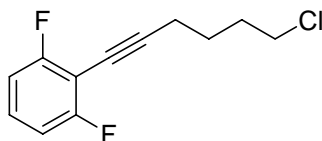

**2-(6-Chlorohex-1-ynyl)-1,3-difluorobenzene (Scheme 3).** Following standard procedure C, using  $\text{Pd}(\text{OAc})_2$  (1.2 mg, 0.005 mmol), **14** (4.2 mg, 0.012 mmol),  $\text{Et}_3\text{N}$  (220  $\mu\text{L}$ , 1.58 mmol), 1-bromo-2,6-difluorobenzene (60  $\mu\text{L}$ , 0.53 mmol), 6-chloro-1-hexyne (110  $\mu\text{L}$ , 0.91 mmol), and *degassed* PTS (1.0 mL, 3 wt %) for 4 h, the titled product (100 mg, 82%) was isolated as a colorless oil after silica gel chromatography (eluent: hexanes);  $^1\text{H}$  NMR (400 MHz,  $\text{CDCl}_3$ )  $\delta$  7.25-7.18 (m, 1H), 6.92-6.86 (m, 2H), 3.63 (t,  $J$  = 6.6 Hz, 2H), 2.56 (t,  $J$  = 6.8 Hz), 2.04-1.96 (m, 2H), 1.85-1.78 (m, 2H);  $^{13}\text{C}$  NMR (100 MHz,  $\text{CDCl}_3$ )  $\delta$  164.73, 162.22, 129.11 (t,  $J$  = 9.9 Hz), 111.26 (dd,  $J$  = 19.0, 5.3 Hz), 100.14, 68.33, 44.76, 31.62, 25.73, 19.25; HREI-MS  $m/z$  Calcd. for  $\text{C}_{12}\text{H}_{11}\text{ClF}_2$  ( $\text{M}^+$ ) 228.0517, found 228.0517.

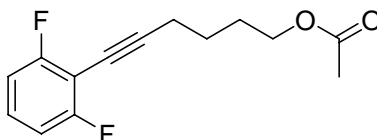

**2-(6-Acetoxihex-1-ynyl)-1,3-difluorobenzene (Scheme 3).** Following standard procedure C, using  $\text{Pd}(\text{OAc})_2$  (1.2 mg, 0.005 mmol), **14** (4.2 mg, 0.012 mmol),  $\text{Et}_3\text{N}$  (220  $\mu\text{L}$ , 1.58 mmol), 1-bromo-2,6-

difluorobenzene (60  $\mu$ L, 0.53 mmol), 6-acetoxy-1-hexyne (130  $\mu$ L, 0.88 mmol), and *degassed* PTS (1.0 mL, 3 wt %) for 5 h, the titled product (132 mg, 98%) was obtained as a colorless oil after silica gel chromatography (eluent: gradient from hexanes to 3% ethyl acetate/hexanes);  $^1\text{H}$  NMR (400 MHz,  $\text{CDCl}_3$ )  $\delta$  7.25-7.17 (m, 1H), 6.92-6.85 (m, 2H), 4.13 (t,  $J$  = 6.4 Hz, 2H), 2.55 (t,  $J$  = 6.8 Hz, 2H), 2.07 (s, 3H), 1.88-1.81 (m, 2H), 1.76-1.69 (m, 2H);  $^{13}\text{C}$  NMR (100 MHz,  $\text{CDCl}_3$ )  $\delta$  171.43, 164.73, 162.17, 129.05 (t,  $J$  = 9.9 Hz), 111.25 (dd,  $J$  = 18.6, 5.7 Hz), 100.35, 68.18, 64.19, 27.89, 25.14, 21.21, 19.65; HREI-MS  $m/z$  Calcd. for  $\text{C}_{14}\text{H}_{14}\text{F}_2\text{O}_2$  ( $\text{M}^+$ ) 252.0962, found 252.0961.

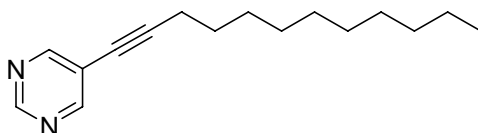

**5-(Dodec-1-ynyl)pyrimidine (Scheme 3).** Following standard procedure C, using  $\text{Pd}(\text{OAc})_2$  (1.2 mg, 0.005 mmol), **14** (4.0 mg, 0.011 mmol),  $\text{Et}_3\text{N}$  (210  $\mu$ L, 1.51 mmol), 5-bromopyrimidine (81 mg, 0.51 mmol), 1-dodecyne (170  $\mu$ L, 0.79 mmol), and *non-degassed* PTS (1.0 mL, 3 wt %) for 6 h, the titled product (100 mg, 81%) was obtained as a golden oil after silica gel chromatography (eluent: gradient from hexanes to 2% ethyl acetate/hexanes);  $^1\text{H}$  NMR (400 MHz,  $\text{CDCl}_3$ )  $\delta$  9.08 (s, 1H), 8.72 (s, 2H), 2.45 (t,  $J$  = 7.2 Hz, 2H), 1.66-1.59 (m, 2H), 1.46-1.41 (m, 2H), 1.38-1.27 (m, 12H), 0.88 (t,  $J$  = 7.0 Hz, 3H);  $^{13}\text{C}$  NMR (100 MHz,  $\text{CDCl}_3$ )  $\delta$  158.94, 156.38, 120.78, 98.52, 74.16, 32.10, 29.78, 29.72, 29.52, 29.31, 29.12, 28.54, 22.90, 19.72, 14.34; HREI-MS  $m/z$  Calcd. for  $\text{C}_{16}\text{H}_{24}\text{N}_2$  ( $\text{M}^+$ ) 244.1939, found 244.1937.

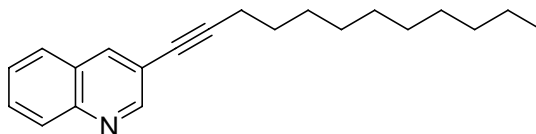

**3-(Dodec-1-ynyl)quinoline (Scheme 3).** Following standard procedure C, using  $\text{Pd}(\text{OAc})_2$  (1.2 mg, 0.005 mmol), **14** (4.2 mg, 0.012 mmol),  $\text{Et}_3\text{N}$  (220  $\mu$ L, 1.58 mmol), 3-bromoquinoline (70  $\mu$ L, 0.52 mmol), 1-dodecyne (180  $\mu$ L, 0.83 mmol), and *non-degassed* PTS (1.0 mL, 3 wt %) for 4 h, the titled product (148 mg, 98%) was isolated as an yellow oil after silica gel chromatography (eluent: gradient from hexanes to 1% ethyl acetate/hexanes);  $^1\text{H}$  NMR (400 MHz,  $\text{CDCl}_3$ )  $\delta$  8.88 (d,  $J$  = 2.0 Hz, 1H), 8.16 (d,  $J$  = 1.6 Hz, 1H), 8.07 (d,  $J$  = 8.4 Hz, 1H), 7.75 (d,  $J$  = 8.4 Hz, 1H), 7.69 (td,  $J$  = 8.4, 1.6 Hz, 1H), 7.54 (td,  $J$  = 8.4, 1.2 Hz, 1H), 2.48 (t,  $J$  = 7.2 Hz, 2H), 1.69-1.62 (m, 2H), 1.50-1.44 (m, 2H), 1.40-1.19 (m, 12H), 0.88 (t,  $J$  = 6.6 Hz);  $^{13}\text{C}$  NMR (100 MHz,  $\text{CDCl}_3$ )  $\delta$  152.72, 146.66, 138.12, 129.80, 129.47, 127.59, 127.53, 127.27, 118.43, 94.38, 78.09, 32.10, 29.79, 29.74, 29.53, 29.36, 29.17, 28.80, 22.89, 19.75, 14.32; HREI-MS  $m/z$  Calcd. for  $\text{C}_{21}\text{H}_{27}\text{N}$  ( $\text{M}^+$ ) 293.2144, found 293.2136.

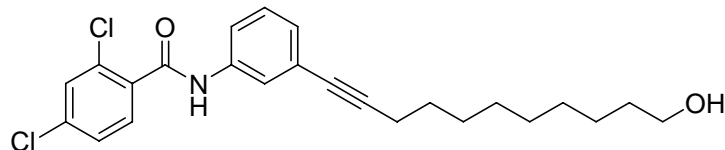

**2,4-Dichloro-N-(3'-(11-hydroxyundec-1-ynyl)phenyl)benzamide (16; Scheme 4).** Following standard procedure C (monitored by TLC) using  $\text{Pd}(\text{OAc})_2$  (3.6 mg, 0.016 mmol), **14** (11.3 mg, 0.032 mmol),  $\text{Et}_3\text{N}$  (210  $\mu$ L, 1.51 mmol), **15** (173 mg, 0.50 mmol), (160  $\mu$ L, 0.84 mmol), and *non-degassed* PTS (1.0 mL, 3 wt %) for 6 h, the titled product (169 mg, 78%) was obtained as a colorless oil that crystallizes to a white solid upon standing at rt after silica gel chromatography (eluent: gradient from



hexanes to 20% ethyl acetate/hexanes); mp 65-67 °C; <sup>1</sup>H NMR (400 MHz, CDCl<sub>3</sub>) δ 8.06 (brs, 1H), 7.69 (d, *J* = 8.4 Hz, 1H), 7.61 (brd, *J* = 9.2 Hz, 2H), 7.47-7.44 (m, 1H), 7.36 (dd, *J* = 8.4, 2.0 Hz, 1H), 7.30 (d, *J* = 8.0 Hz, 1H), 7.20 (d, *J* = 7.6 Hz, 1H), 3.62 (t, *J* = 6.6 Hz, 2H), 2.41 (t, *J* = 7.0 Hz, 2H), 1.64-1.54 (m, 4H), 1.47-1.44 (m, 2H), 1.33 (brs, 8H); <sup>13</sup>C NMR (100 MHz, CDCl<sub>3</sub>) δ 163.75, 137.48, 133.62, 131.66, 131.60, 130.38, 129.24, 128.36, 127.95, 125.24, 123.21, 119.61, 91.38, 80.23, 63.26, 32.95, 29.57, 29.46, 29.14, 28.97, 28.75, 25.87, 19.56; HREI-MS *m/z* calcd. for C<sub>24</sub>H<sub>27</sub>Cl<sub>2</sub>NO<sub>2</sub> (M<sup>+</sup>) 431.1419, found 431.1411.

---

<sup>1</sup> Sharma, S.; Oehlschlager, A. C. *J. Org. Chem.* **1989**, *54*, 5064–5073.

<sup>2</sup> Ma, Y.; Song, C.; Jian, W.; Wu, Q.; Wang, Y.; Liu, X.; Andrus, M. B. *Org. Lett.* **2003**, *5*, 3317–3319.

<sup>3</sup> Hundertmark, T.; Littke, A. F.; Buchwald, S. L.; Fu, G. C. *Org. Lett.* **2000**, *2*, 1729–1731.

<sup>4</sup> Gelman, D.; Buchwald, S. L. *Angew. Chem. Int. Ed.* **2003**, *42*, 5993–5996 and references cited therein.

<sup>5</sup> Yus, M.; Ortiz, R.; Huerta, F. F. *Tetrahedron* **2003**, *59*, 8525–8542.

# $^1\text{H}$ and $^{13}\text{C}$ NMR Spectra

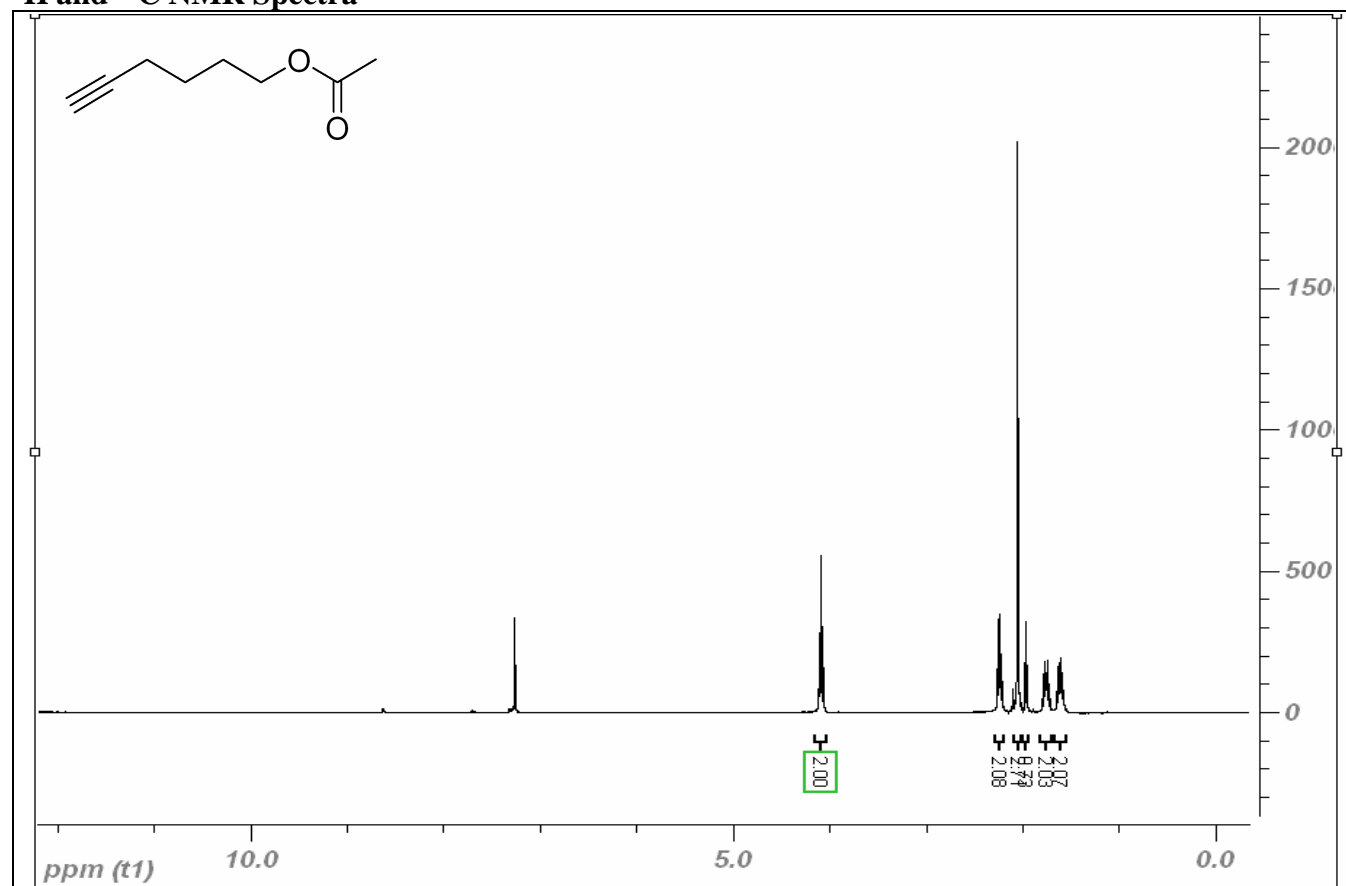

DWC-2-280-1, clear colorless liquid after Kugelrohr distillation

exp8 std13c

SAMPLE DEC. & VT  
 date Dec 6 2007 dfreq 399.950  
 solvent CDCl3 dn H1  
 file ACQUISITION exp dpr 42  
 sfreq 100.577 dm -109.0  
 tn C13 dmm 3yy  
 at 0.640 dmf 11106  
 nd 32000 dseg  
 sw 25000.0 dres 1.0  
 fb 14000 homo n  
 bs 4  
 tpwr 50 lb  
 pw 10.0 vfile 1.00  
 dt 7.000 proc ft  
 tof 0 tn 65536  
 nt 1e+09 math f  
 ct 100  
 alock s  
 gain not used  
 flags WBS  
 il n  
 in y  
 dp y  
 hs nn  
 DISPLAY  
 sp -2984.1  
 wp 25000.0  
 vs 1103  
 sc 0  
 wc 250  
 hzmm 100.00  
 ls 2095.27  
 rftl 2984.1  
 rfp 0  
 th 6  
 ins 100.000  
 al ph

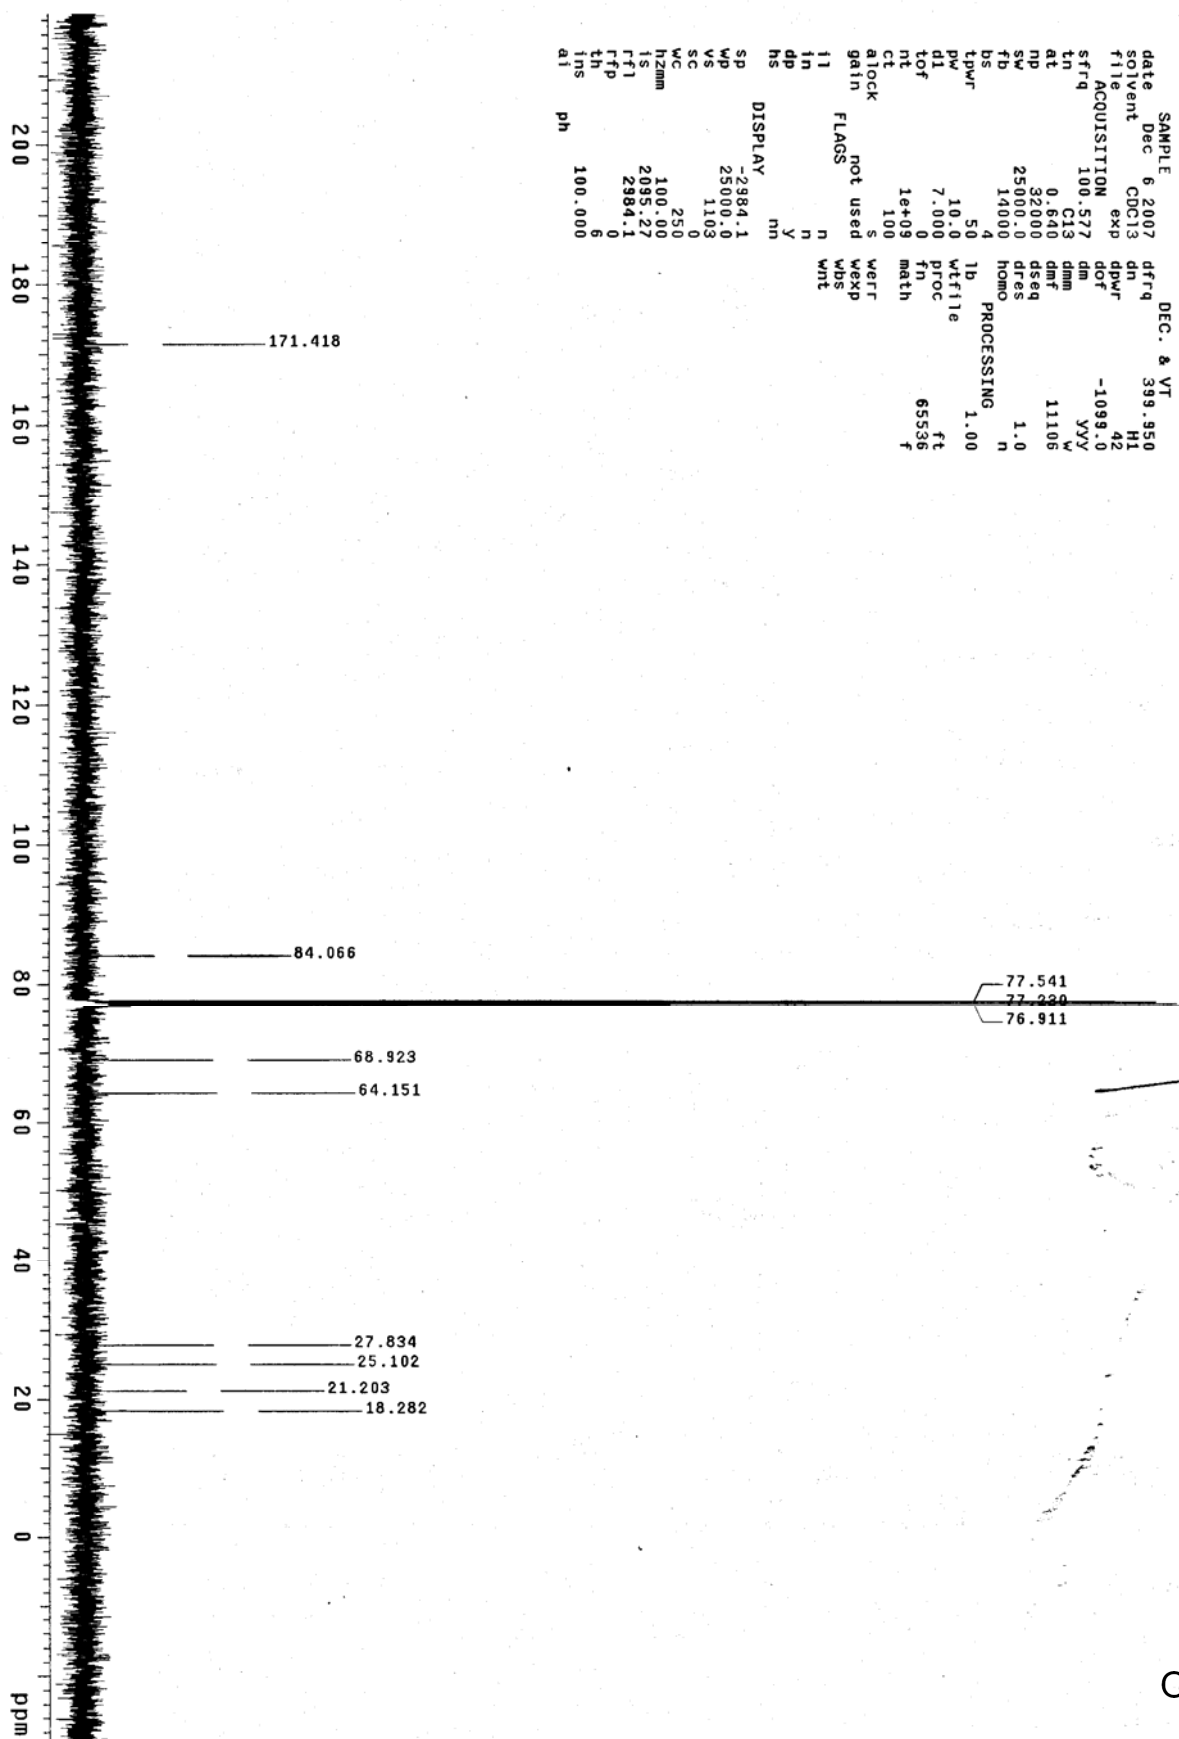

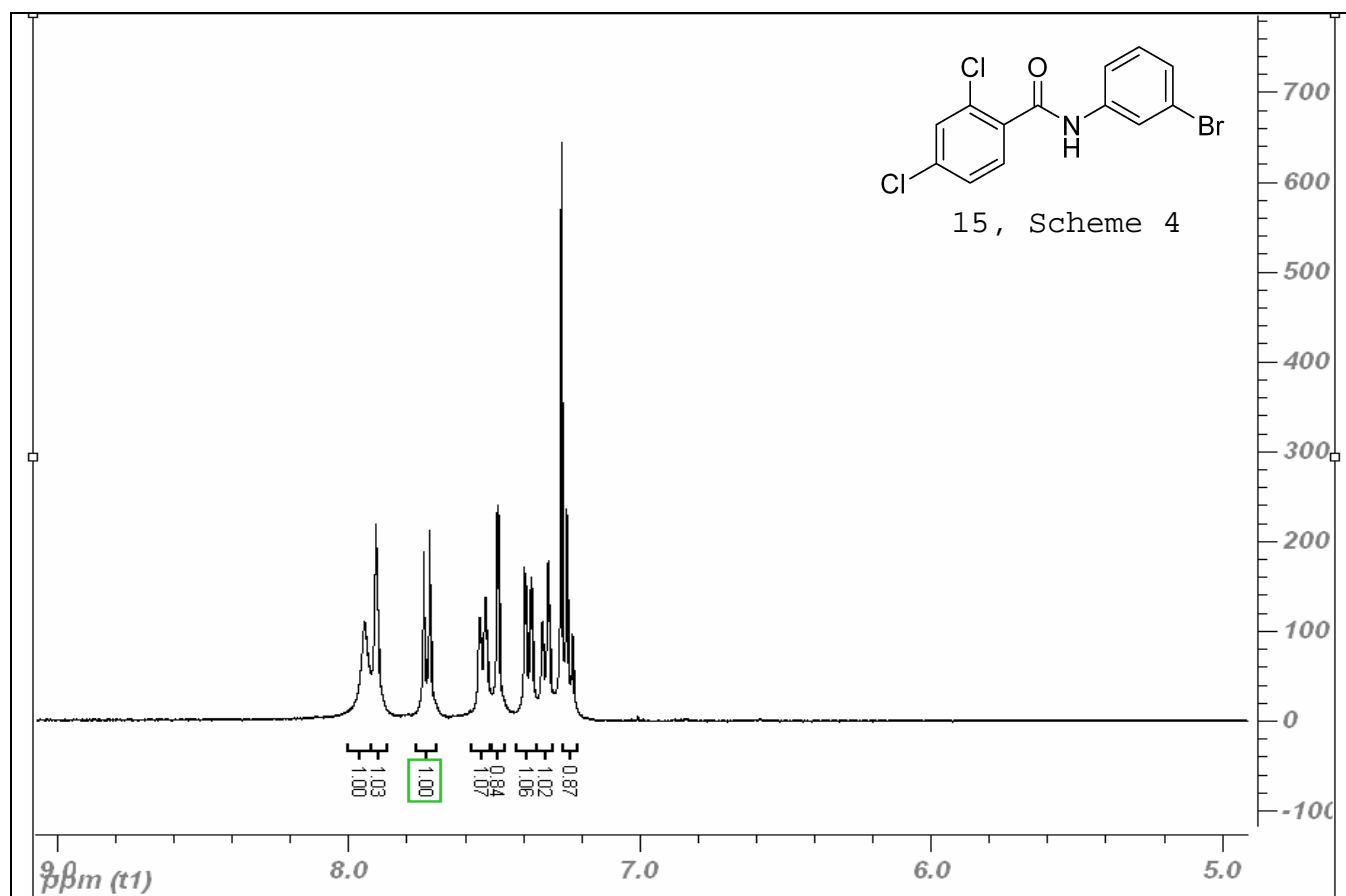

BLR-193-1, white solid after chromatogra  
phy

expt std13c

SAMPLE DEC. & VT  
date Mar 31 2008 dfrq 399.950  
f01ent C13 d1 n  
f11ent /nmr400/home/ dfr -1099.0  
L1solute/CHCl3/5% dfr 42  
-193-1.C13.CDC13-1 d1 dm yyy  
ACQUISITION id dm 11106  
sfrq 100.577 dseq  
tn C13 dres 1.0  
at 0.640 homo  
np 32000  
sw 25000.0 lb PROCESSING 1.00  
fb 14000 wfttle  
bs 4 proc  
tpwr 50 fn  
pw 10.0 math 65536  
di 7.000  
tof 0  
nt 1e+09 werr  
ct 108 wexp  
a1ock s wbs  
gain not used wnt  
FLAGS  
f1 n  
f2 n  
f3 n  
f4 n  
f5 n  
f6 n  
f7 n  
f8 n  
f9 n  
f10 n  
f11 n  
f12 n  
f13 n  
f14 n  
f15 n  
f16 n  
f17 n  
f18 n  
f19 n  
f20 n  
f21 n  
f22 n  
f23 n  
f24 n  
f25 n  
f26 n  
f27 n  
f28 n  
f29 n  
f30 n  
f31 n  
f32 n  
f33 n  
f34 n  
f35 n  
f36 n  
f37 n  
f38 n  
f39 n  
f40 n  
f41 n  
f42 n  
f43 n  
f44 n  
f45 n  
f46 n  
f47 n  
f48 n  
f49 n  
f50 n  
f51 n  
f52 n  
f53 n  
f54 n  
f55 n  
f56 n  
f57 n  
f58 n  
f59 n  
f60 n  
f61 n  
f62 n  
f63 n  
f64 n  
f65 n  
f66 n  
f67 n  
f68 n  
f69 n  
f70 n  
f71 n  
f72 n  
f73 n  
f74 n  
f75 n  
f76 n  
f77 n  
f78 n  
f79 n  
f80 n  
f81 n  
f82 n  
f83 n  
f84 n  
f85 n  
f86 n  
f87 n  
f88 n  
f89 n  
f90 n  
f91 n  
f92 n  
f93 n  
f94 n  
f95 n  
f96 n  
f97 n  
f98 n  
f99 n  
f100 n  
f101 n  
f102 n  
f103 n  
f104 n  
f105 n  
f106 n  
f107 n  
f108 n  
f109 n  
f110 n  
f111 n  
f112 n  
f113 n  
f114 n  
f115 n  
f116 n  
f117 n  
f118 n  
f119 n  
f120 n  
f121 n  
f122 n  
f123 n  
f124 n  
f125 n  
f126 n  
f127 n  
f128 n  
f129 n  
f130 n  
f131 n  
f132 n  
f133 n  
f134 n  
f135 n  
f136 n  
f137 n  
f138 n  
f139 n  
f140 n  
f141 n  
f142 n  
f143 n  
f144 n  
f145 n  
f146 n  
f147 n  
f148 n  
f149 n  
f150 n  
f151 n  
f152 n  
f153 n  
f154 n  
f155 n  
f156 n  
f157 n  
f158 n  
f159 n  
f160 n  
f161 n  
f162 n  
f163 n  
f164 n  
f165 n  
f166 n  
f167 n  
f168 n  
f169 n  
f170 n  
f171 n  
f172 n  
f173 n  
f174 n  
f175 n  
f176 n  
f177 n  
f178 n  
f179 n  
f180 n  
f181 n  
f182 n  
f183 n  
f184 n  
f185 n  
f186 n  
f187 n  
f188 n  
f189 n  
f190 n  
f191 n  
f192 n  
f193 n  
f194 n  
f195 n  
f196 n  
f197 n  
f198 n  
f199 n  
f200 n  
f201 n  
f202 n  
f203 n  
f204 n  
f205 n  
f206 n  
f207 n  
f208 n  
f209 n  
f210 n  
f211 n  
f212 n  
f213 n  
f214 n  
f215 n  
f216 n  
f217 n  
f218 n  
f219 n  
f220 n  
f221 n  
f222 n  
f223 n  
f224 n  
f225 n  
f226 n  
f227 n  
f228 n  
f229 n  
f230 n  
f231 n  
f232 n  
f233 n  
f234 n  
f235 n  
f236 n  
f237 n  
f238 n  
f239 n  
f240 n  
f241 n  
f242 n  
f243 n  
f244 n  
f245 n  
f246 n  
f247 n  
f248 n  
f249 n  
f250 n  
f251 n  
f252 n  
f253 n  
f254 n  
f255 n  
f256 n  
f257 n  
f258 n  
f259 n  
f260 n  
f261 n  
f262 n  
f263 n  
f264 n  
f265 n  
f266 n  
f267 n  
f268 n  
f269 n  
f270 n  
f271 n  
f272 n  
f273 n  
f274 n  
f275 n  
f276 n  
f277 n  
f278 n  
f279 n  
f280 n  
f281 n  
f282 n  
f283 n  
f284 n  
f285 n  
f286 n  
f287 n  
f288 n  
f289 n  
f290 n  
f291 n  
f292 n  
f293 n  
f294 n  
f295 n  
f296 n  
f297 n  
f298 n  
f299 n  
f300 n  
f301 n  
f302 n  
f303 n  
f304 n  
f305 n  
f306 n  
f307 n  
f308 n  
f309 n  
f310 n  
f311 n  
f312 n  
f313 n  
f314 n  
f315 n  
f316 n  
f317 n  
f318 n  
f319 n  
f320 n  
f321 n  
f322 n  
f323 n  
f324 n  
f325 n  
f326 n  
f327 n  
f328 n  
f329 n  
f330 n  
f331 n  
f332 n  
f333 n  
f334 n  
f335 n  
f336 n  
f337 n  
f338 n  
f339 n  
f340 n  
f341 n  
f342 n  
f343 n  
f344 n  
f345 n  
f346 n  
f347 n  
f348 n  
f349 n  
f350 n  
f351 n  
f352 n  
f353 n  
f354 n  
f355 n  
f356 n  
f357 n  
f358 n  
f359 n  
f360 n  
f361 n  
f362 n  
f363 n  
f364 n  
f365 n  
f366 n  
f367 n  
f368 n  
f369 n  
f370 n  
f371 n  
f372 n  
f373 n  
f374 n  
f375 n  
f376 n  
f377 n  
f378 n  
f379 n  
f380 n  
f381 n  
f382 n  
f383 n  
f384 n  
f385 n  
f386 n  
f387 n  
f388 n  
f389 n  
f390 n  
f391 n  
f392 n  
f393 n  
f394 n  
f395 n  
f396 n  
f397 n  
f398 n  
f399 n  
f400 n  
f401 n  
f402 n  
f403 n  
f404 n  
f405 n  
f406 n  
f407 n  
f408 n  
f409 n  
f410 n  
f411 n  
f412 n  
f413 n  
f414 n  
f415 n  
f416 n  
f417 n  
f418 n  
f419 n  
f420 n  
f421 n  
f422 n  
f423 n  
f424 n  
f425 n  
f426 n  
f427 n  
f428 n  
f429 n  
f430 n  
f431 n  
f432 n  
f433 n  
f434 n  
f435 n  
f436 n  
f437 n  
f438 n  
f439 n  
f440 n  
f441 n  
f442 n  
f443 n  
f444 n  
f445 n  
f446 n  
f447 n  
f448 n  
f449 n  
f450 n  
f451 n  
f452 n  
f453 n  
f454 n  
f455 n  
f456 n  
f457 n  
f458 n  
f459 n  
f460 n  
f461 n  
f462 n  
f463 n  
f464 n  
f465 n  
f466 n  
f467 n  
f468 n  
f469 n  
f470 n  
f471 n  
f472 n  
f473 n  
f474 n  
f475 n  
f476 n  
f477 n  
f478 n  
f479 n  
f480 n  
f481 n  
f482 n  
f483 n  
f484 n  
f485 n  
f486 n  
f487 n  
f488 n  
f489 n  
f490 n  
f491 n  
f492 n  
f493 n  
f494 n  
f495 n  
f496 n  
f497 n  
f498 n  
f499 n  
f500 n  
f501 n  
f502 n  
f503 n  
f504 n  
f505 n  
f506 n  
f507 n  
f508 n  
f509 n  
f510 n  
f511 n  
f512 n  
f513 n  
f514 n  
f515 n  
f516 n  
f517 n  
f518 n  
f519 n  
f520 n  
f521 n  
f522 n  
f523 n  
f524 n  
f525 n  
f526 n  
f527 n  
f528 n  
f529 n  
f530 n  
f531 n  
f532 n  
f533 n  
f534 n  
f535 n  
f536 n  
f537 n  
f538 n  
f539 n  
f540 n  
f541 n  
f542 n  
f543 n  
f544 n  
f545 n  
f546 n  
f547 n  
f548 n  
f549 n  
f550 n  
f551 n  
f552 n  
f553 n  
f554 n  
f555 n  
f556 n  
f557 n  
f558 n  
f559 n  
f560 n  
f561 n  
f562 n  
f563 n  
f564 n  
f565 n  
f566 n  
f567 n  
f568 n  
f569 n  
f570 n  
f571 n  
f572 n  
f573 n  
f574 n  
f575 n  
f576 n  
f577 n  
f578 n  
f579 n  
f580 n  
f581 n  
f582 n  
f583 n  
f584 n  
f585 n  
f586 n  
f587 n  
f588 n  
f589 n  
f590 n  
f591 n  
f592 n  
f593 n  
f594 n  
f595 n  
f596 n  
f597 n  
f598 n  
f599 n  
f600 n  
f601 n  
f602 n  
f603 n  
f604 n  
f605 n  
f606 n  
f607 n  
f608 n  
f609 n  
f610 n  
f611 n  
f612 n  
f613 n  
f614 n  
f615 n  
f616 n  
f617 n  
f618 n  
f619 n  
f620 n  
f621 n  
f622 n  
f623 n  
f624 n  
f625 n  
f626 n  
f627 n  
f628 n  
f629 n  
f630 n  
f631 n  
f632 n  
f633 n  
f634 n  
f635 n  
f636 n  
f637 n  
f638 n  
f639 n  
f640 n  
f641 n  
f642 n  
f643 n  
f644 n  
f645 n  
f646 n  
f647 n  
f648 n  
f649 n  
f650 n  
f651 n  
f652 n  
f653 n  
f654 n  
f655 n  
f656 n  
f657 n  
f658 n  
f659 n  
f660 n  
f661 n  
f662 n  
f663 n  
f664 n  
f665 n  
f666 n  
f667 n  
f668 n  
f669 n  
f670 n  
f671 n  
f672 n  
f673 n  
f674 n  
f675 n  
f676 n  
f677 n  
f678 n  
f679 n  
f680 n  
f681 n  
f682 n  
f683 n  
f684 n  
f685 n  
f686 n  
f687 n  
f688 n  
f689 n  
f690 n  
f691 n  
f692 n  
f693 n  
f694 n  
f695 n  
f696 n  
f697 n  
f698 n  
f699 n  
f700 n  
f701 n  
f702 n  
f703 n  
f704 n  
f705 n  
f706 n  
f707 n  
f708 n  
f709 n  
f710 n  
f711 n  
f712 n  
f713 n  
f714 n  
f715 n  
f716 n  
f717 n  
f718 n  
f719 n  
f720 n  
f721 n  
f722 n  
f723 n  
f724 n  
f725 n  
f726 n  
f727 n  
f728 n  
f729 n  
f730 n  
f731 n  
f732 n  
f733 n  
f734 n  
f735 n  
f736 n  
f737 n  
f738 n  
f739 n  
f740 n  
f741 n  
f742 n  
f743 n  
f744 n  
f745 n  
f746 n  
f747 n  
f748 n  
f749 n  
f750 n  
f751 n  
f752 n  
f753 n  
f754 n  
f755 n  
f756 n  
f757 n  
f758 n  
f759 n  
f760 n  
f761 n  
f762 n  
f763 n  
f764 n  
f765 n  
f766 n  
f767 n  
f768 n  
f769 n  
f770 n  
f771 n  
f772 n  
f773 n  
f774 n  
f775 n  
f776 n  
f777 n  
f778 n  
f779 n  
f780 n  
f781 n  
f782 n  
f783 n  
f784 n  
f785 n  
f786 n  
f787 n  
f788 n  
f789 n  
f790 n  
f791 n  
f792 n  
f793 n  
f794 n  
f795 n  
f796 n  
f797 n  
f798 n  
f799 n  
f800 n  
f801 n  
f802 n  
f803 n  
f804 n  
f805 n  
f806 n  
f807 n  
f808 n  
f809 n  
f810 n  
f811 n  
f812 n  
f813 n  
f814 n  
f815 n  
f816 n  
f817 n  
f818 n  
f819 n  
f820 n  
f821 n  
f822 n  
f823 n  
f824 n  
f825 n  
f826 n  
f827 n  
f828 n  
f829 n  
f830 n  
f831 n  
f832 n  
f833 n  
f834 n  
f835 n  
f836 n  
f837 n  
f838 n  
f839 n  
f840 n  
f841 n  
f842 n  
f843 n  
f844 n  
f845 n  
f846 n  
f847 n  
f848 n  
f849 n  
f850 n  
f851 n  
f852 n  
f853 n  
f854 n  
f855 n  
f856 n  
f857 n  
f858 n  
f859 n  
f860 n  
f861 n  
f862 n  
f863 n  
f864 n  
f865 n  
f866 n  
f867 n  
f868 n  
f869 n  
f870 n  
f871 n  
f872 n  
f873 n  
f874 n  
f875 n  
f876 n  
f877 n  
f878 n  
f879 n  
f880 n  
f881 n  
f882 n  
f883 n  
f884 n  
f885 n  
f886 n  
f887 n  
f888 n  
f889 n  
f890 n  
f891 n  
f892 n  
f893 n  
f894 n  
f895 n  
f896 n  
f897 n  
f898 n  
f899 n  
f900 n  
f901 n  
f902 n  
f903 n  
f904 n  
f905 n  
f906 n  
f907 n  
f908 n  
f909 n  
f910 n  
f911 n  
f912 n  
f913 n  
f914 n  
f915 n  
f916 n  
f917 n  
f918 n  
f919 n  
f920 n  
f921 n  
f922 n  
f923 n  
f924 n  
f925 n  
f926 n  
f927 n  
f928 n  
f929 n  
f930 n  
f931 n  
f932 n  
f933 n  
f934 n  
f935 n  
f936 n  
f937 n  
f938 n  
f939 n  
f940 n  
f941 n  
f942 n  
f943 n  
f944 n  
f945 n  
f946 n  
f947 n  
f948 n  
f949 n  
f950 n  
f951 n  
f952 n  
f953 n  
f954 n  
f955 n  
f956 n  
f957 n  
f958 n  
f959 n  
f960 n  
f961 n  
f962 n  
f963 n  
f964 n  
f965 n  
f966 n  
f967 n  
f968 n  
f969 n  
f970 n  
f971 n  
f972 n  
f973 n  
f974 n  
f975 n  
f976 n  
f977 n  
f978 n  
f979 n  
f980 n  
f981 n  
f982 n  
f983 n  
f984 n  
f985 n  
f986 n  
f987 n  
f988 n  
f989 n  
f990 n  
f991 n  
f992 n  
f993 n  
f994 n  
f995 n  
f996 n  
f997 n  
f998 n  
f999 n  
f1000 n  
f1001 n  
f1002 n  
f1003 n  
f1004 n  
f1005 n  
f1006 n  
f1007 n  
f1008 n  
f1009 n  
f1010 n  
f1011 n  
f1012 n  
f1013 n  
f1014 n  
f1015 n  
f1016 n  
f1017 n  
f1018 n  
f1019 n  
f1020 n  
f1021 n  
f1022 n  
f1023 n  
f1024 n  
f1025 n  
f1026 n  
f1027 n  
f1028 n  
f1029 n  
f1030 n  
f1031 n  
f1032 n  
f1033 n  
f1034 n  
f1035 n  
f1036 n  
f1037 n  
f1038 n  
f1039 n  
f1040 n  
f1041 n  
f1042 n  
f1043 n  
f1044 n  
f1045 n  
f1046 n  
f1047 n  
f1048 n  
f1049 n  
f1050 n  
f1051 n  
f1052 n  
f1053 n  
f1054 n  
f1055 n  
f1056 n  
f1057 n  
f1058 n  
f1059 n  
f1060 n  
f1061 n  
f1062 n  
f1063 n  
f1064 n  
f1065 n  
f1066 n  
f1067 n  
f1068 n  
f1069 n  
f1070 n  
f1071 n  
f1072 n  
f1073 n  
f1074 n  
f1075 n  
f1076 n  
f1077 n  
f1078 n  
f1079 n  
f1080 n  
f1081 n  
f1082 n  
f1083 n  
f1084 n  
f1085 n  
f1086 n  
f1087 n  
f1088 n  
f1089 n  
f1090 n  
f1091 n  
f1092 n  
f1093 n  
f1094 n  
f1095 n  
f1096 n  
f1097 n  
f1098 n  
f1099 n  
f1100 n  
f1101 n  
f1102 n  
f1103 n  
f1104 n  
f1105 n  
f1106 n  
f1107 n  
f1108 n  
f1109 n  
f1110 n  
f1111 n  
f1112 n  
f1113 n  
f1114 n  
f1115 n  
f1116 n  
f1117 n  
f1118 n  
f1119 n  
f1120 n  
f1121 n  
f1122 n  
f1123 n  
f1124 n  
f1125 n  
f1126 n  
f1127 n  
f1128 n  
f1129 n  
f1130 n  
f1131 n  
f1132 n  
f1133 n  
f1134 n  
f1135 n  
f1136 n  
f1137 n  
f1138 n  
f1139 n  
f1140 n  
f1141 n  
f1142 n  
f1143 n  
f1144 n  
f1145 n  
f1146 n  
f1147 n  
f1148 n  
f1149 n  
f1150 n  
f1151 n  
f1152 n  
f1153 n  
f1154 n  
f1155 n  
f1156 n  
f1157 n  
f1158 n  
f1159 n  
f1160 n  
f1161 n  
f1162 n  
f1163 n  
f1164 n  
f1165 n  
f1166 n  
f1167 n  
f1168 n  
f1169 n  
f1170 n  
f1171 n  
f1172 n  
f1173 n  
f1174 n  
f1175 n  
f1176 n  
f1177 n  
f1178 n  
f1179 n  
f1180 n  
f1181 n  
f1182 n  
f1183 n  
f1184 n  
f1185 n  
f1186 n  
f1187 n  
f1188 n  
f1189 n  
f1190 n  
f1191 n  
f1192 n  
f1193 n  
f1194 n  
f1195 n  
f1196 n  
f1197 n  
f1198 n  
f1199 n  
f1200 n  
f1201 n  
f1202 n  
f1203 n  
f1204 n  
f1205 n  
f1206 n  
f1207 n  
f1208 n  
f1209 n  
f1210 n  
f1211 n  
f1212 n  
f1213 n  
f1214 n  
f1215 n  
f1216 n  
f1217 n  
f1218 n  
f1219 n  
f1220 n  
f1221 n  
f1222 n  
f1223 n  
f1224 n  
f1225 n  
f1226 n  
f1227 n  
f1228 n  
f1229 n  
f1230 n  
f1231 n  
f1232 n  
f1233 n  
f1234 n  
f1235 n  
f1236 n  
f1237 n  
f1238 n  
f1239 n  
f1240 n  
f1241 n  
f1242 n  
f1243 n  
f1244 n  
f1245 n  
f1246 n  
f1247 n  
f1248 n  
f1249 n  
f1250 n  
f1251 n  
f1252 n  
f1253 n  
f1254 n  
f1255 n  
f1256 n  
f1257 n  
f1258 n  
f1259 n  
f1260 n  
f1261 n  
f1262 n  
f1263 n  
f1264 n  
f1265 n  
f1266 n  
f1267 n  
f1268 n  
f1269 n  
f1270 n  
f1271 n  
f1272 n  
f1273 n  
f1274 n  
f1275 n  
f1276 n  
f1277 n  
f1278 n  
f1279 n  
f1280 n  
f1281 n  
f1282 n  
f1283 n  
f1284 n  
f1285 n  
f1286 n  
f1287 n  
f1288 n  
f1289 n  
f1290 n  
f1291 n  
f1292 n  
f1293 n  
f1294 n  
f1295 n  
f1296 n  
f1297 n  
f1298 n  
f1299 n  
f1300 n  
f1301 n  
f1302 n  
f1303 n  
f1304 n  
f1305 n  
f1306 n  
f1307 n  
f1308 n  
f1309 n  
f1310 n  
f1311 n  
f1312 n  
f1313 n  
f1314 n  
f1315 n  
f1316 n  
f1317 n  
f1318 n  
f1319 n  
f1320 n  
f1321 n  
f1322 n  
f1323 n  
f1324 n  
f1325 n  
f1326 n  
f1327 n  
f1328 n  
f1329 n  
f1330 n  
f1331 n  
f1332 n  
f1333 n  
f1334 n  
f1335 n  
f1336 n  
f1337 n  
f1338 n  
f1339 n  
f1340 n  
f1341 n  
f1342 n  
f1343 n  
f1344 n  
f1345 n  
f1346 n  
f1347 n  
f1348 n  
f1349 n  
f1350 n  
f1351 n  
f1352 n  
f1353 n  
f1354 n  
f1355 n  
f1356 n  
f1357 n  
f1358 n  
f1359 n  
f1360 n  
f1361 n  
f1362 n  
f1363 n  
f1364 n  
f1365 n  
f1366 n  
f1367 n  
f1368 n  
f1369 n  
f1370 n  
f1371 n  
f1372 n  
f1373 n  
f1374 n  
f1375 n  
f1376 n  
f1377 n  
f1378 n  
f1379 n  
f1380 n  
f1381 n  
f1382 n  
f1383 n  
f1384 n  
f1385 n  
f1386 n  
f1387 n  
f1388 n  
f1389 n  
f1390 n  
f1391 n  
f1392 n  
f1393 n  
f1394 n  
f1395 n  
f1396 n  
f1397 n  
f1398 n  
f1399 n  
f1400 n  
f1401 n  
f1402 n  
f1403 n  
f1404 n  
f1405 n  
f1406 n  
f1407 n  
f1408 n  
f1409 n  
f1410 n  
f1411 n  
f1412 n  
f1413 n  
f1414 n  
f1415 n  
f1416 n  
f1417 n  
f1418 n  
f1419 n  
f1420 n  
f1421 n  
f1422 n  
f1423 n  
f1424 n  
f1425 n  
f1426 n  
f1427 n  
f1428 n  
f1429 n  
f1430 n  
f1431 n  
f1432 n  
f1433 n  
f1434 n  
f1435 n  
f1436 n  
f1437 n  
f1438 n  
f1439 n  
f1440 n  
f1441 n  
f1442 n  
f1443 n  
f1444 n  
f1445 n  
f1446 n  
f1447 n  
f1448 n  
f1449 n  
f1450 n  
f1451 n  
f1452 n  
f1453 n  
f1454 n  
f1455 n  
f1456 n  
f1457 n  
f1458 n  
f1459 n  
f1460 n  
f1461 n  
f1462 n  
f1463 n  
f1464 n  
f1465 n  
f1466 n  
f1467 n  
f1468 n  
f1469 n  
f1470 n  
f1471 n  
f1472 n  
f1473 n  
f1474 n  
f1475 n  
f1476 n  
f1477 n  
f1478 n  
f1479 n  
f1480 n  
f1481 n  
f1482 n  
f1483 n  
f1484 n  
f1485 n  
f1486 n  
f1487 n  
f1488 n  
f1489 n  
f1490 n  
f1491 n  
f1492 n  
f1493 n  
f1494 n  
f1495 n  
f1496 n  
f1497 n  
f1498 n  
f1499 n  
f1500 n  
f1501 n  
f1502 n  
f1503 n  
f1504 n  
f1505 n  
f1506 n  
f1507 n  
f1508 n  
f1509 n  
f1510 n  
f1511 n  
f1512 n  
f1513 n  
f1514 n  
f1515 n  
f1516 n  
f1517 n  
f1518 n  
f1519 n  
f1520 n  
f1521 n  
f1522 n  
f1523 n  
f1524 n  
f1525 n  
f1526 n  
f1527 n  
f1528 n  
f1529 n  
f1530 n  
f1531 n  
f1532 n  
f1533 n  
f1534 n  
f1535 n  
f1536 n  
f1537 n  
f1538 n  
f1539 n  
f1540 n  
f1541 n  
f1542 n  
f1543 n  
f1544 n  
f1545 n  
f1546 n  
f1547 n  
f1548 n  
f1549 n  
f1550 n  
f1551 n  
f1552 n  
f1553 n  
f1554 n  
f1555 n  
f1556 n  
f1557 n  
f1558 n  
f1559 n  
f1560 n  
f1561 n  
f1562 n  
f1563 n  
f1564 n  
f1565 n  
f1566 n  
f1567 n  
f1568 n  
f1569 n  
f1570 n  
f1571 n  
f1572 n  
f1573 n  
f1574 n  
f1575 n  
f1576 n  
f1577 n  
f1578 n  
f1579 n  
f1580 n  
f1581 n  
f1582 n  
f1583 n  
f1584 n  
f1585 n  
f1586 n  
f1587 n  
f1588 n  
f1589 n  
f1590 n  
f1591 n  
f1592 n  
f1593 n  
f1594 n  
f1595 n  
f1596 n  
f1597 n  
f1598 n  
f1599 n  
f1600 n  
f1601 n  
f1602 n  
f1603 n  
f1604 n  
f1605 n  
f1606 n  
f1607 n  
f1608 n  
f1609 n  
f1610 n  
f1611 n  
f1612 n  
f1613 n  
f1614 n  
f1615 n  
f1616 n  
f1617 n  
f1618 n  
f1619 n  
f1620 n  
f1621 n  
f1622 n  
f1623 n  
f1624 n  
f1625 n  
f1626 n  
f1627 n  
f1628 n  
f1629 n  
f1630 n  
f1631 n  
f1632 n  
f1633 n  
f1634 n  
f1635 n  
f1636 n

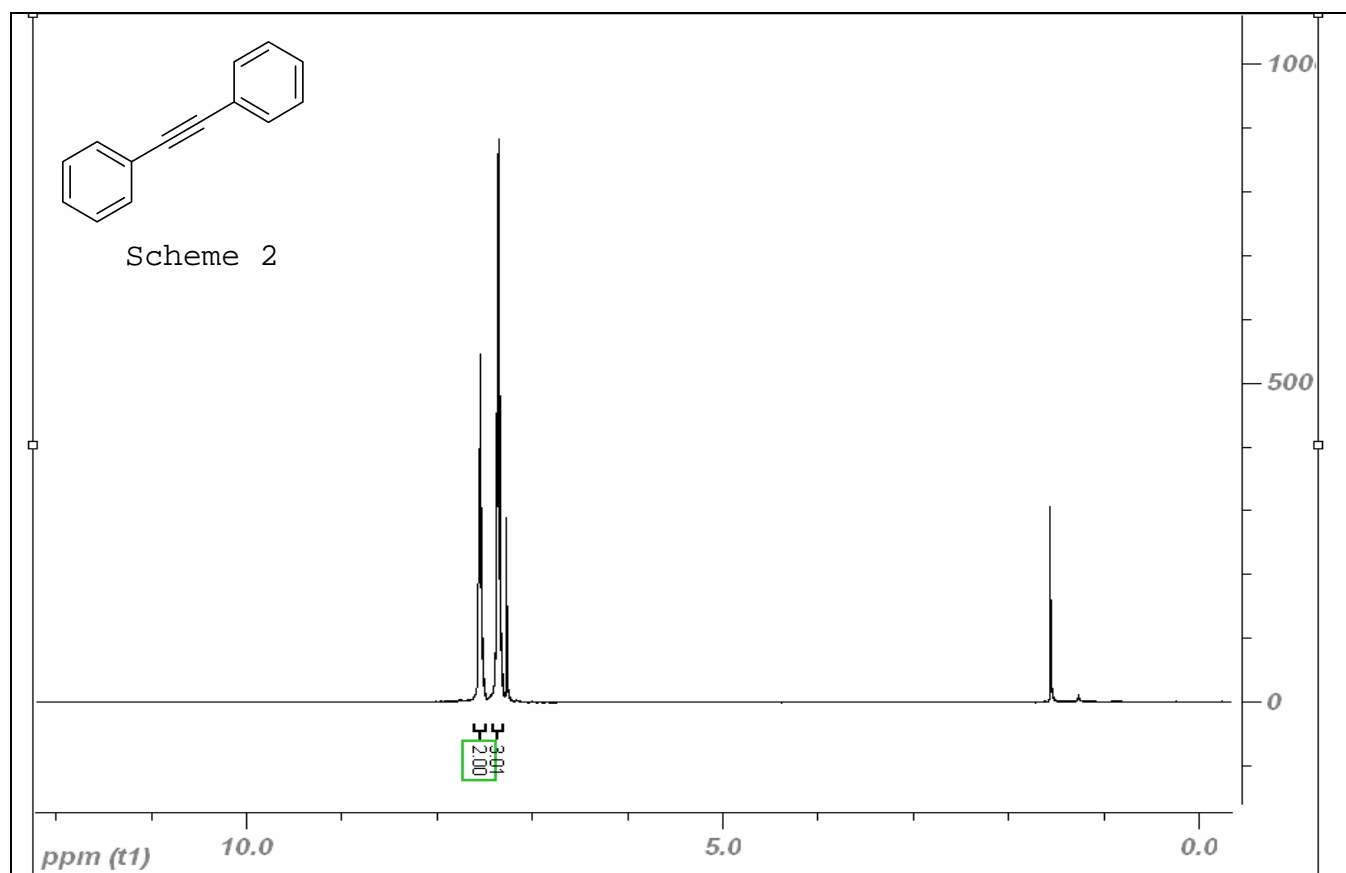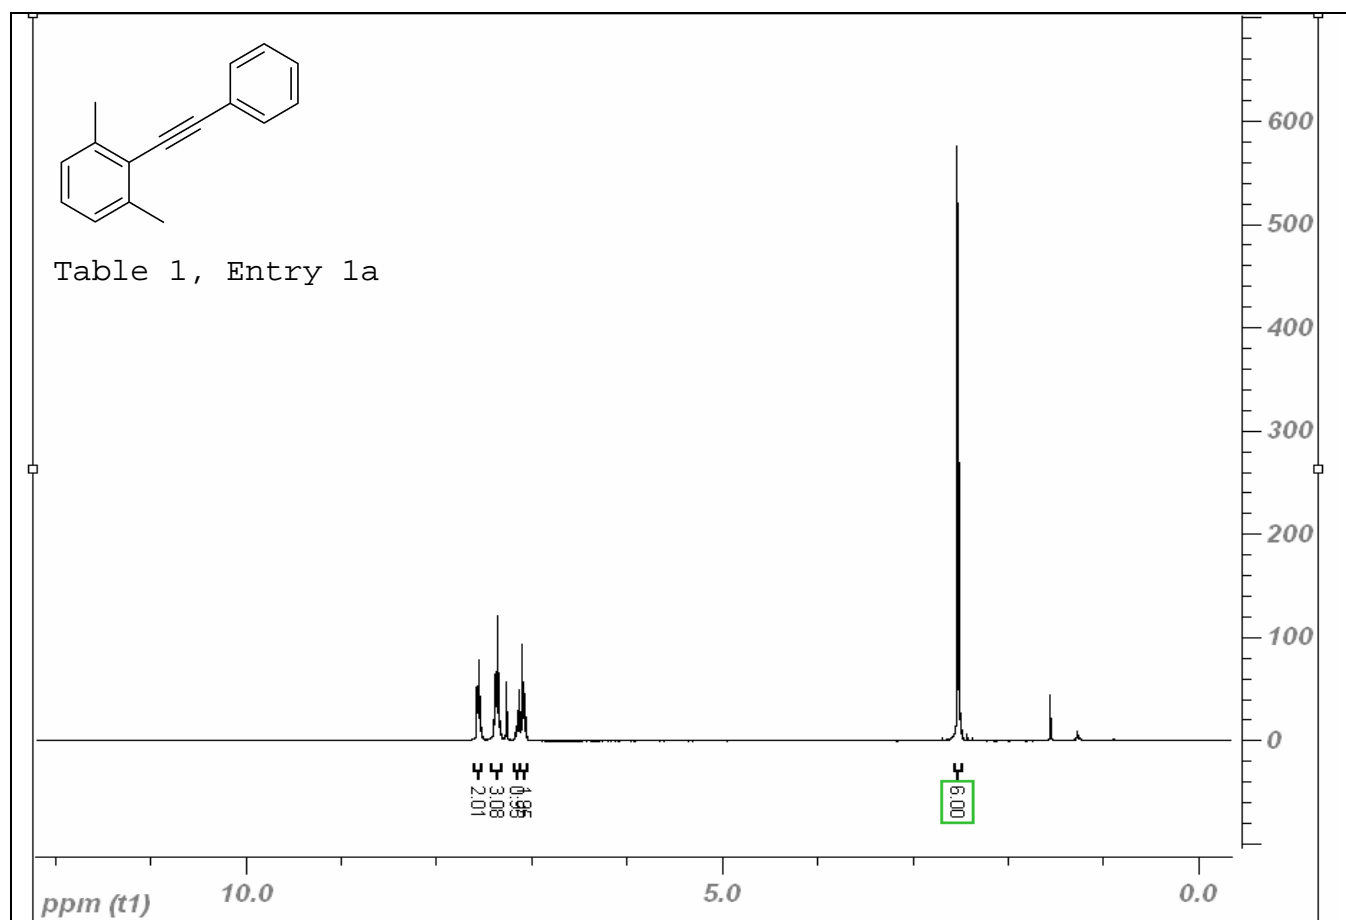

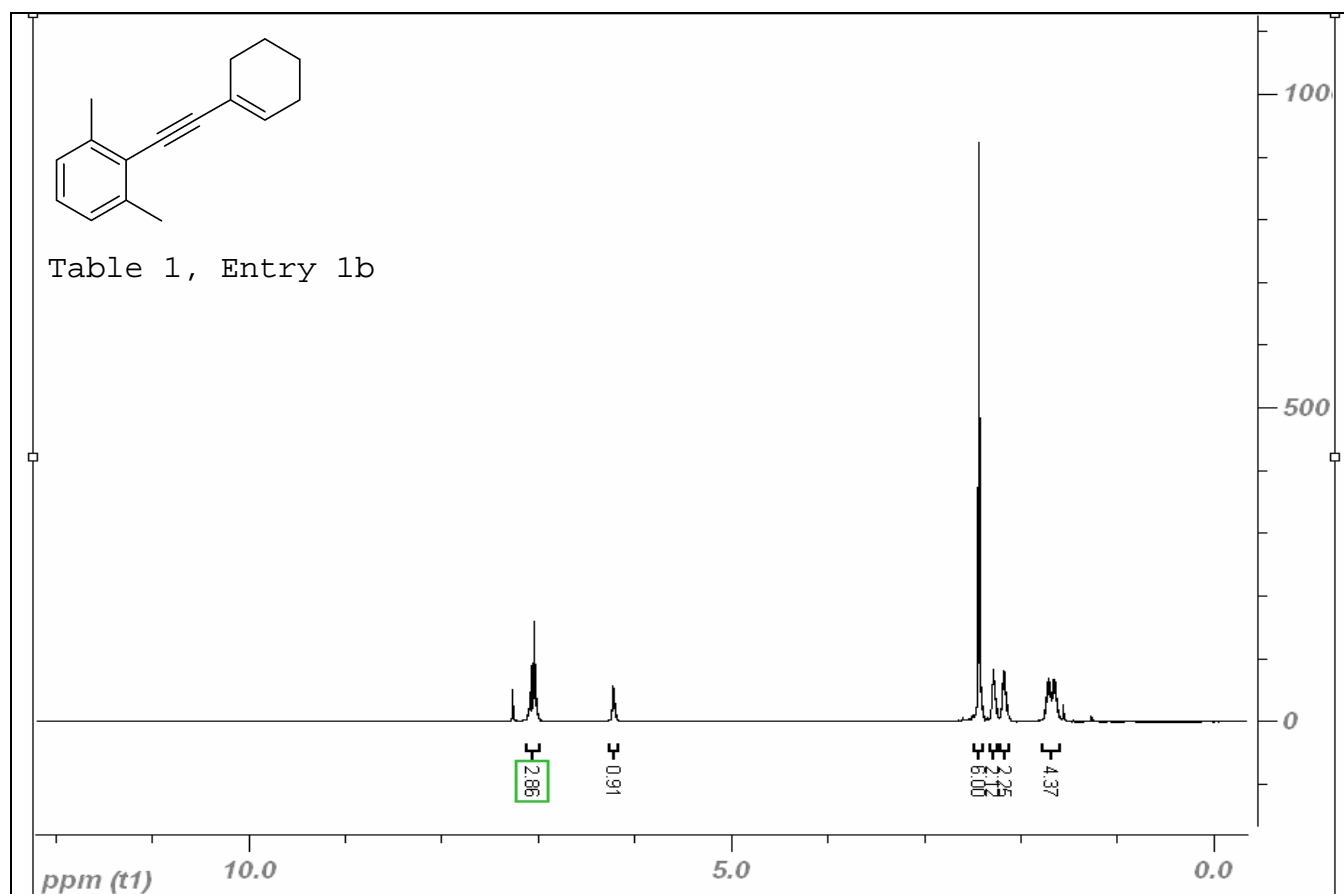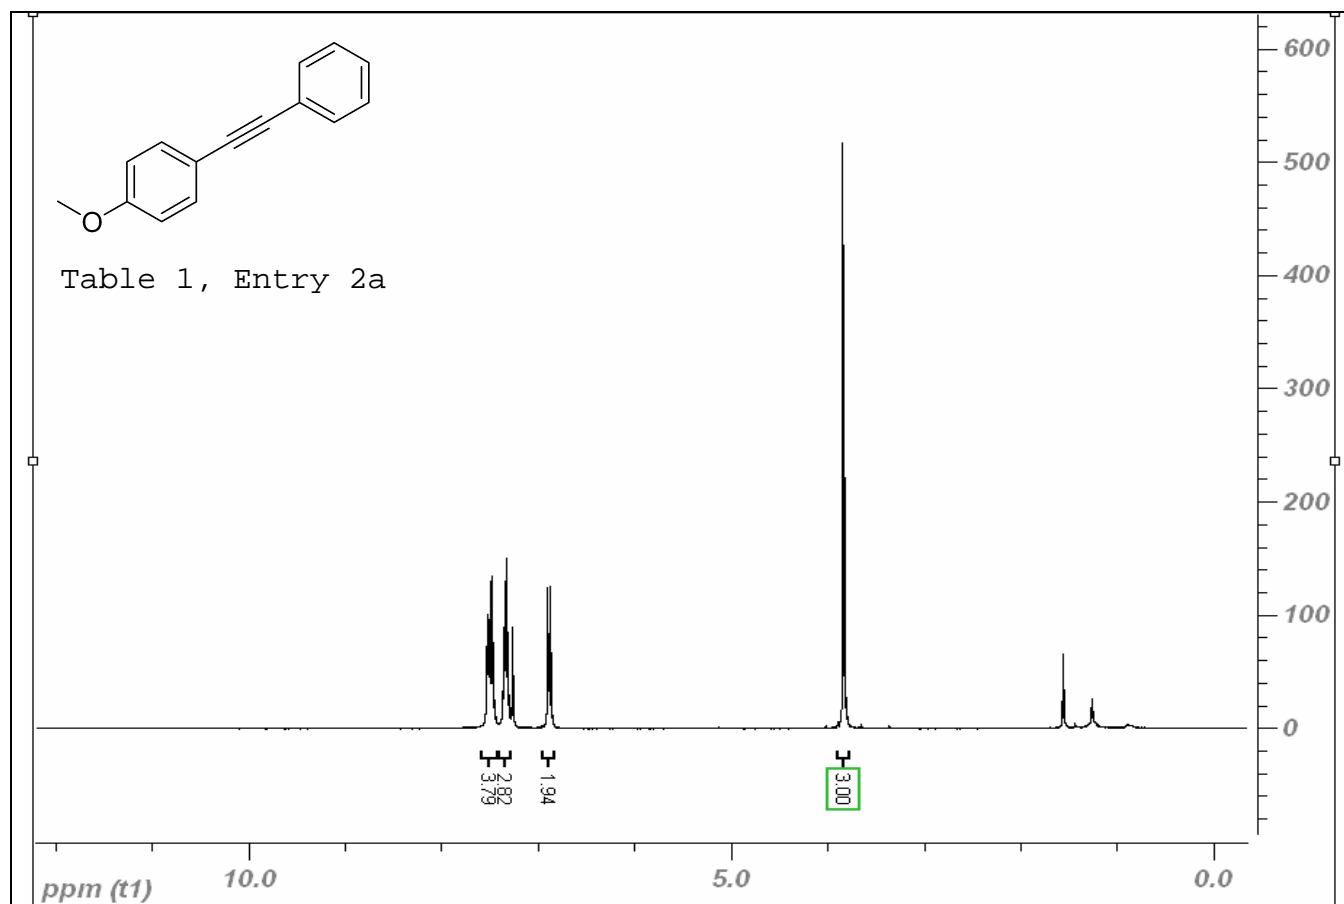

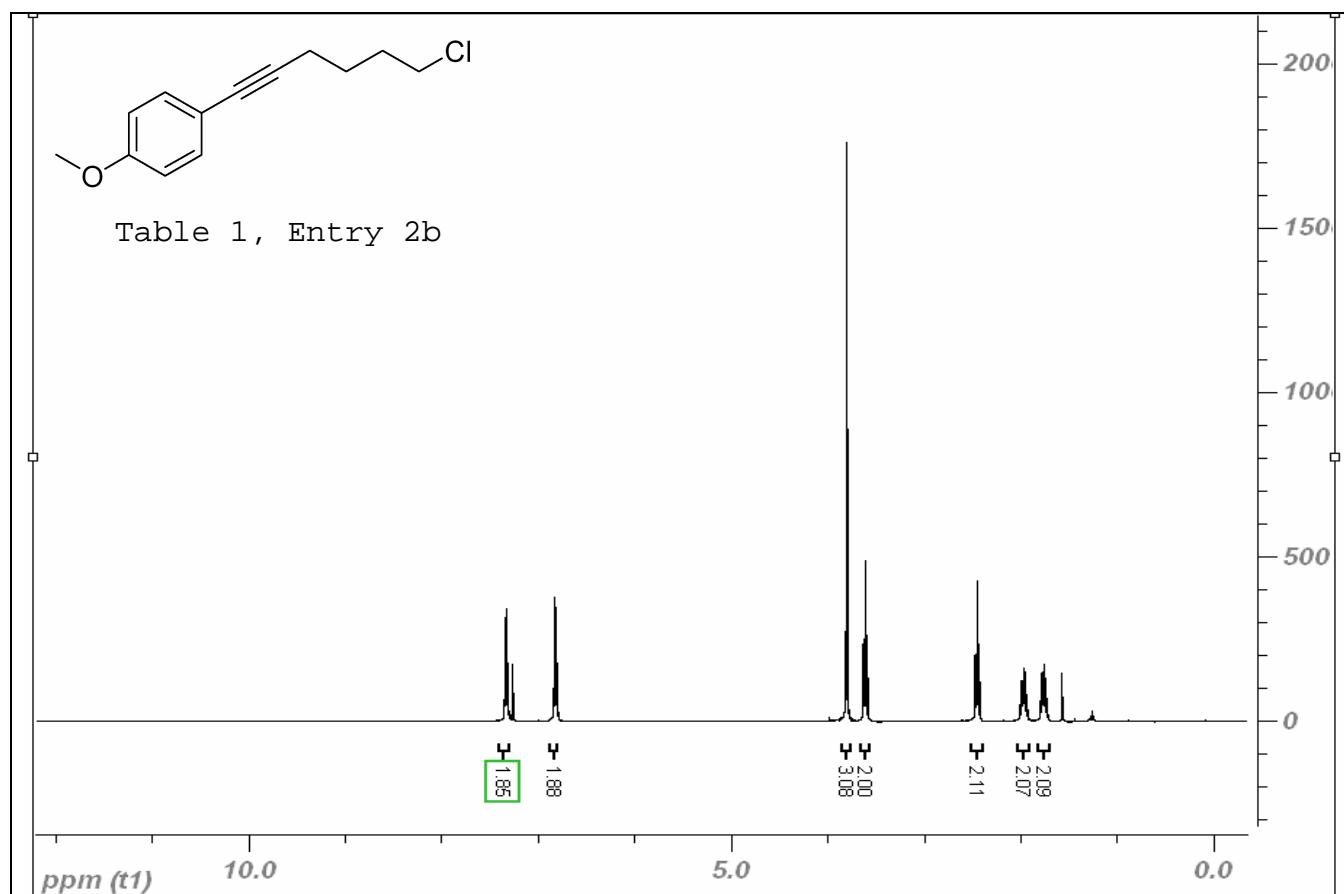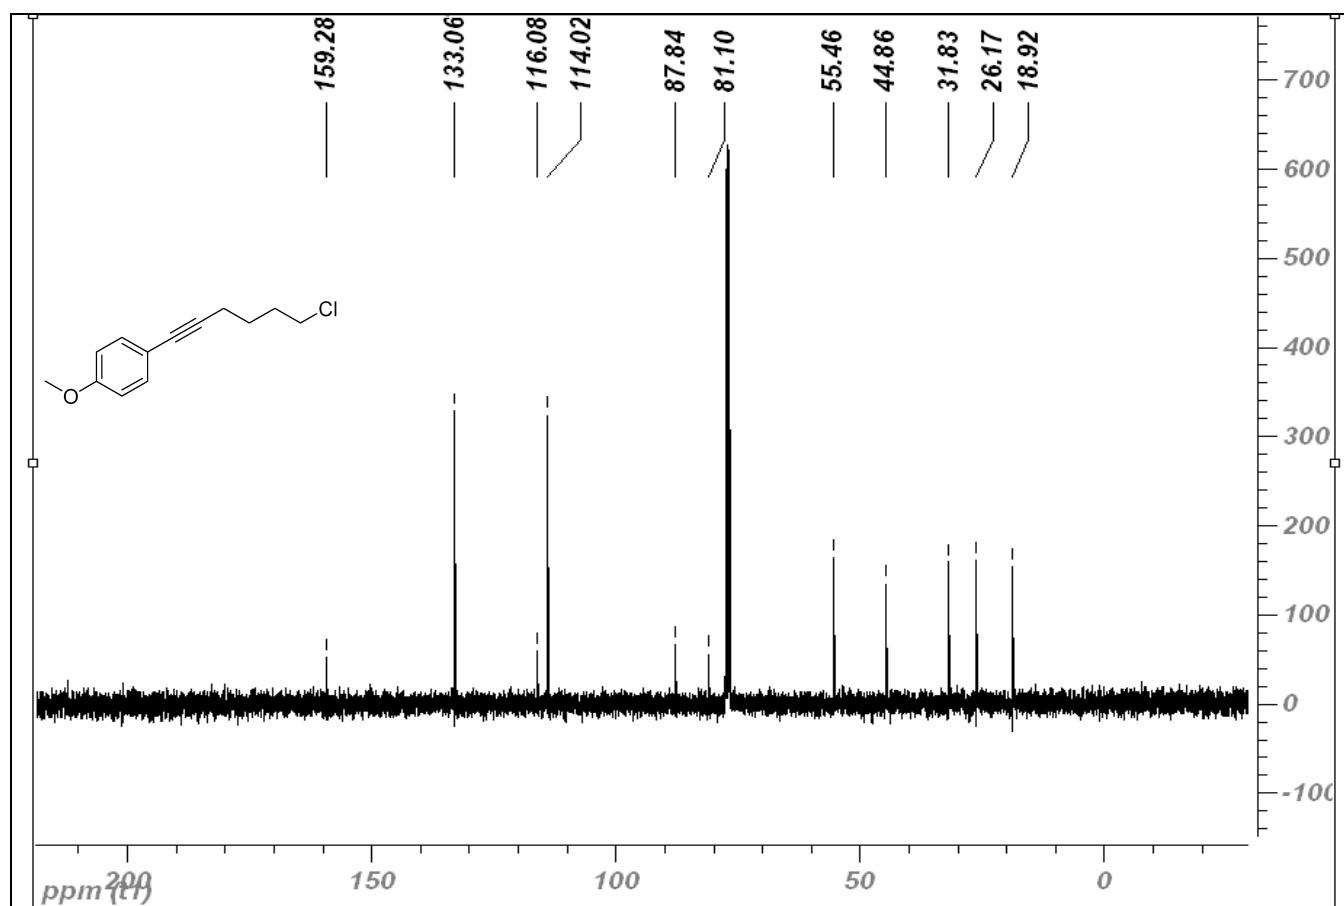



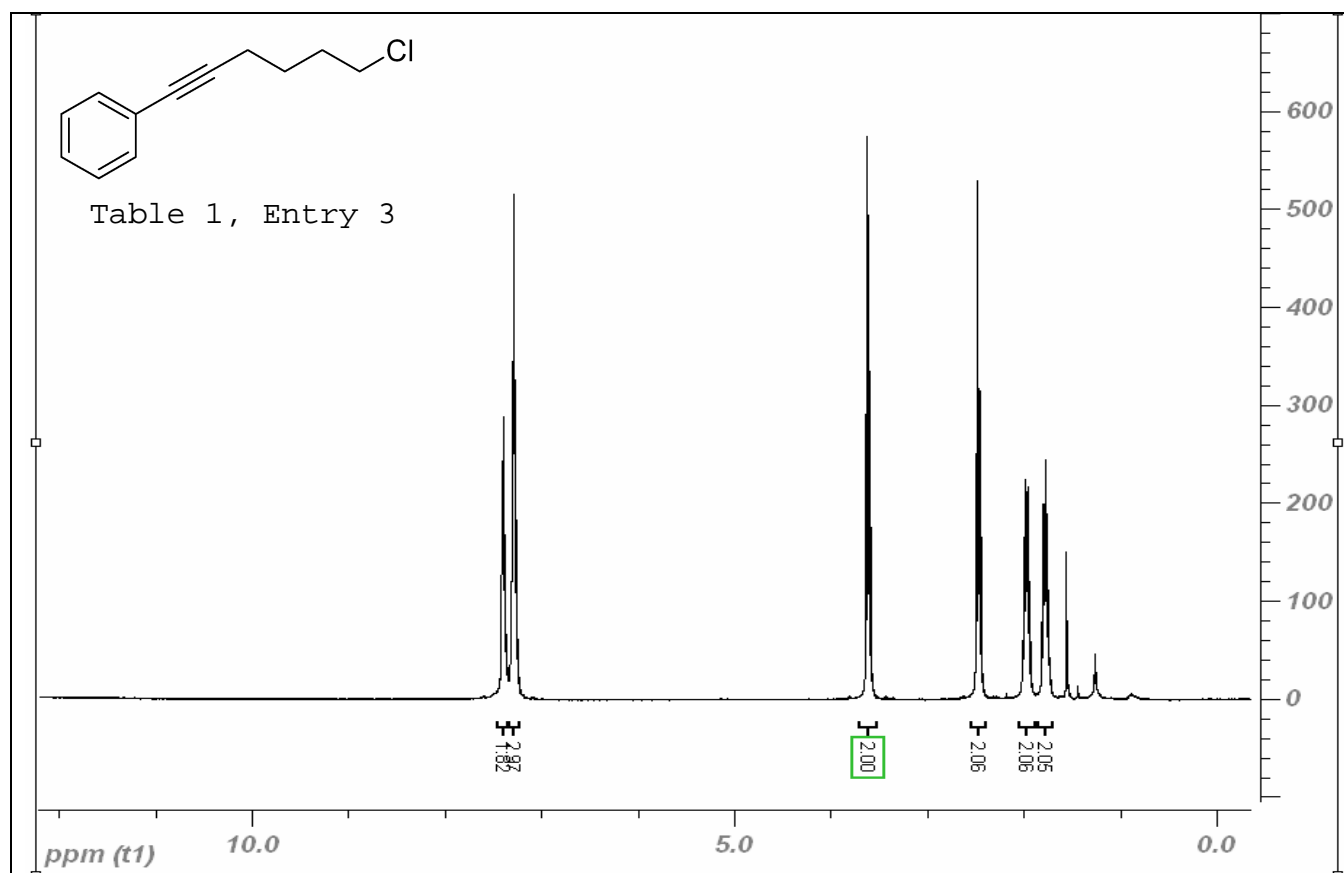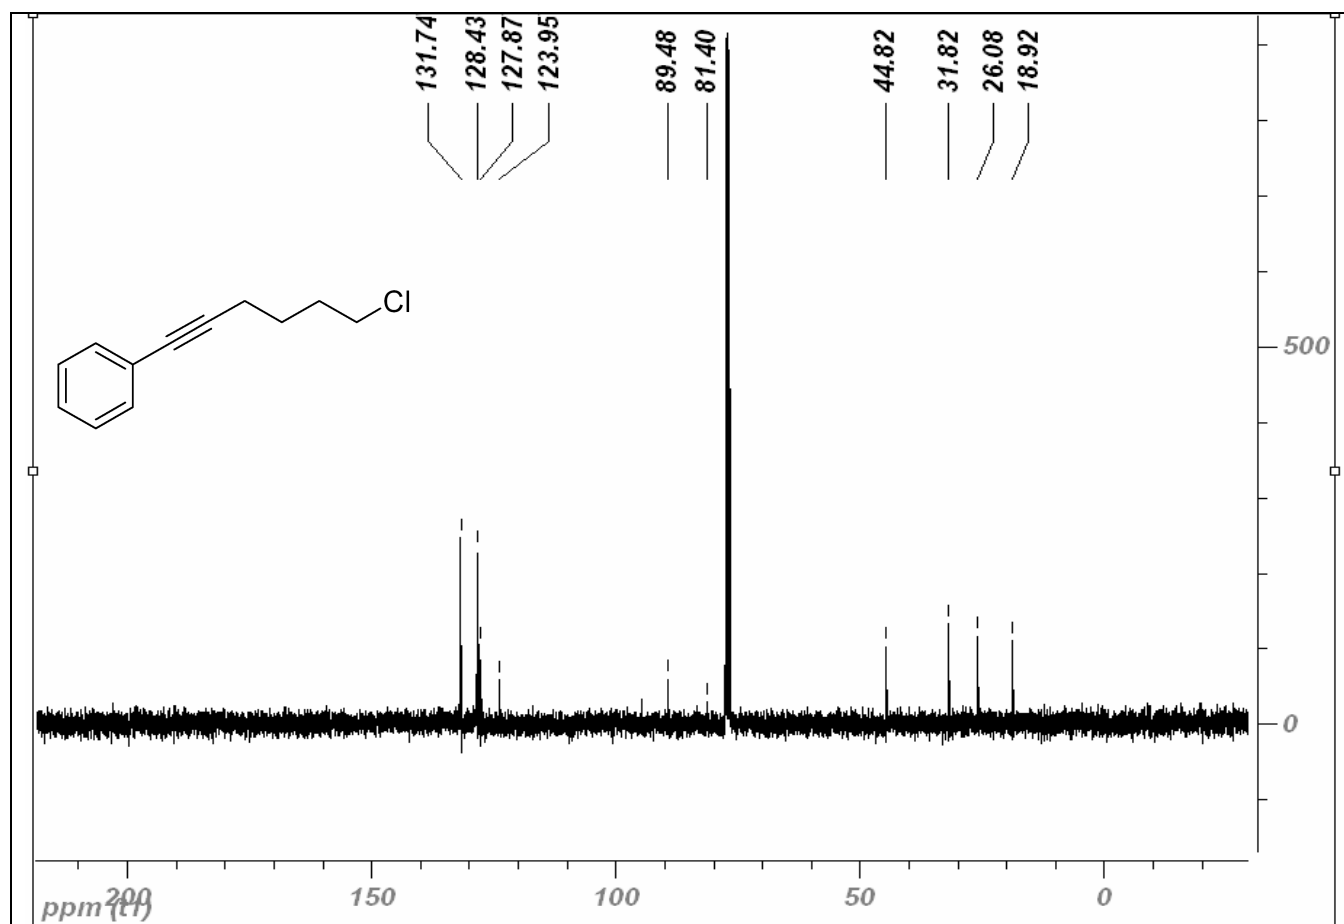

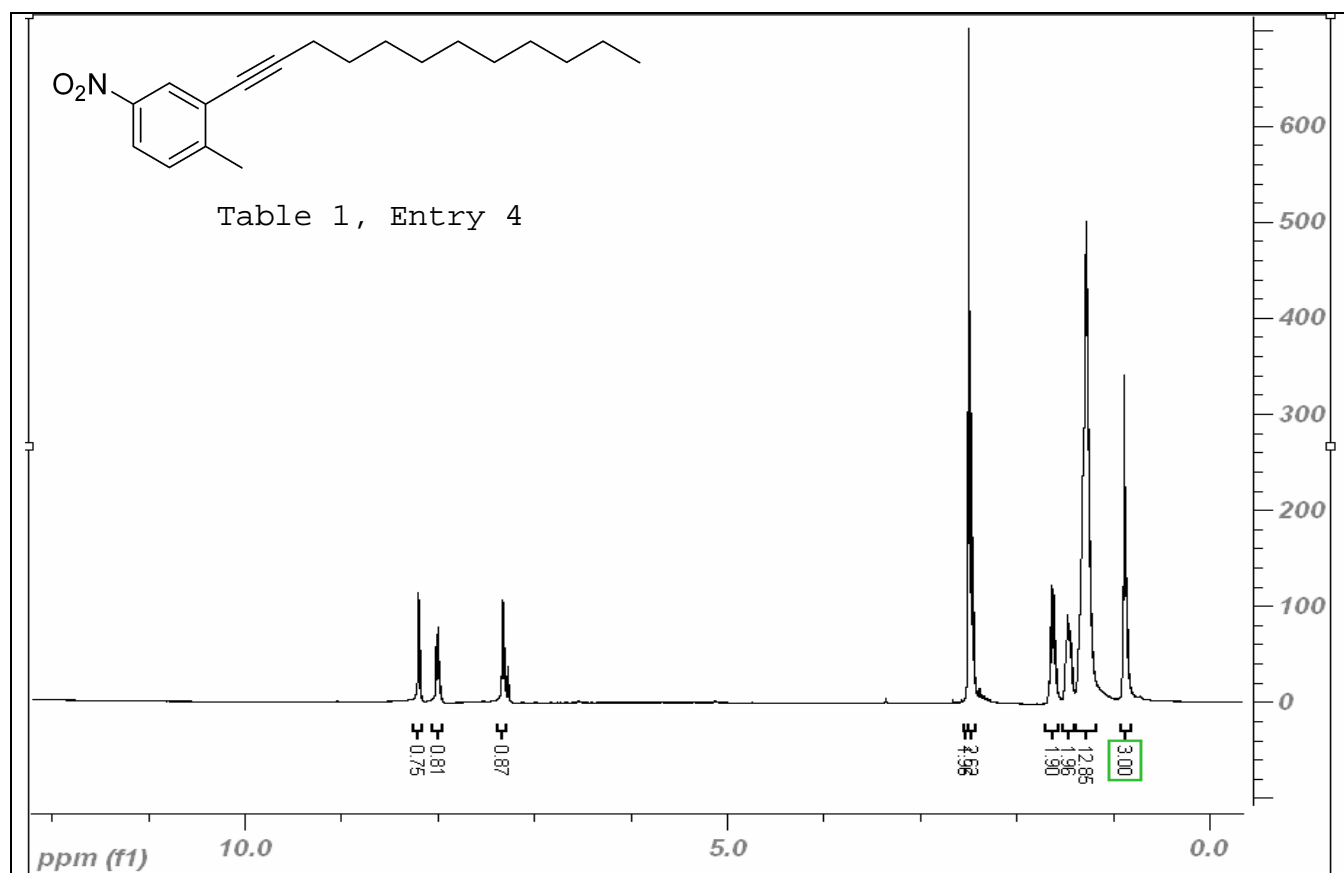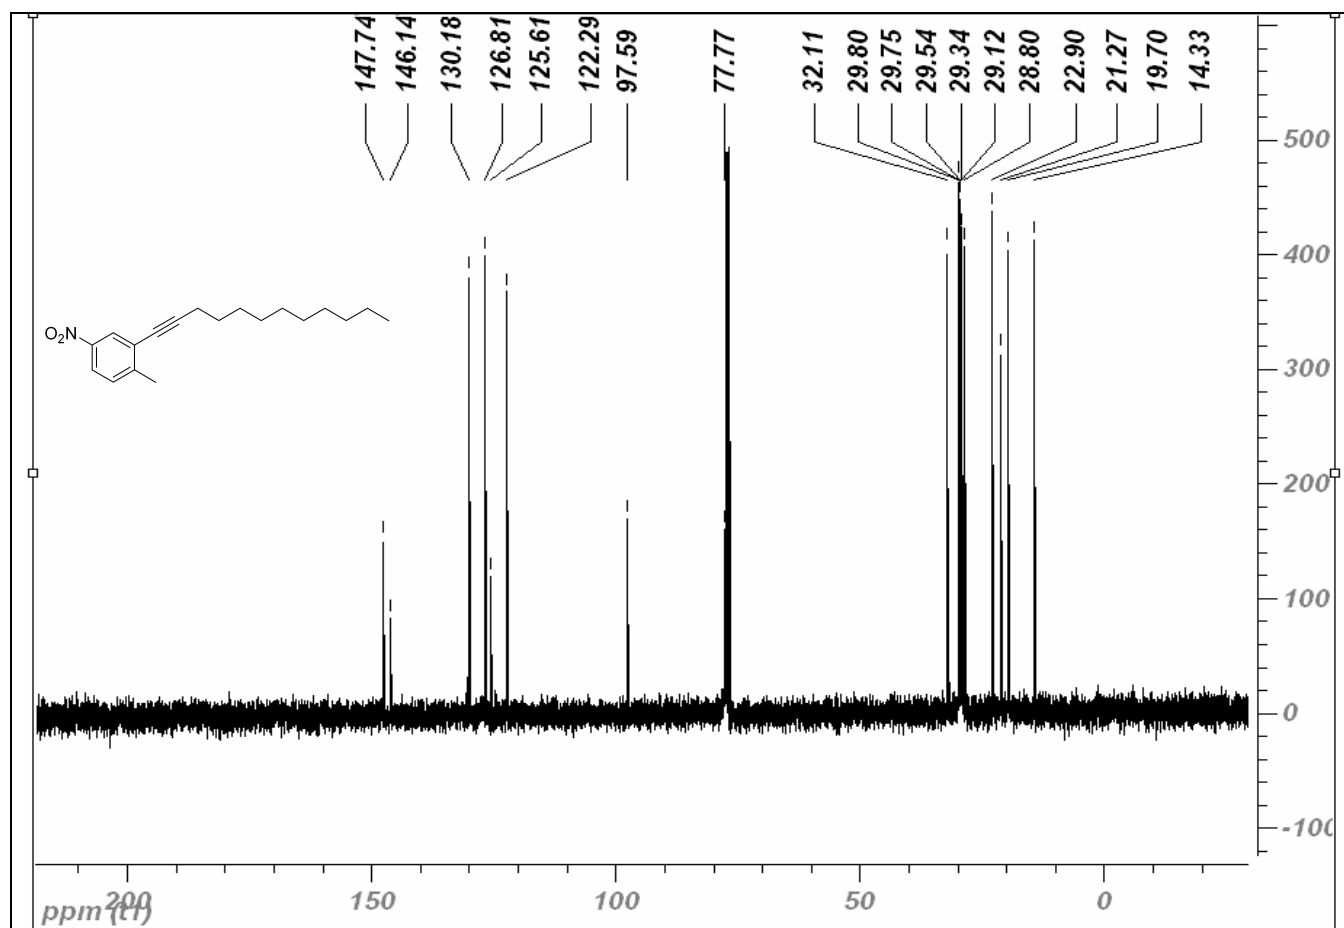

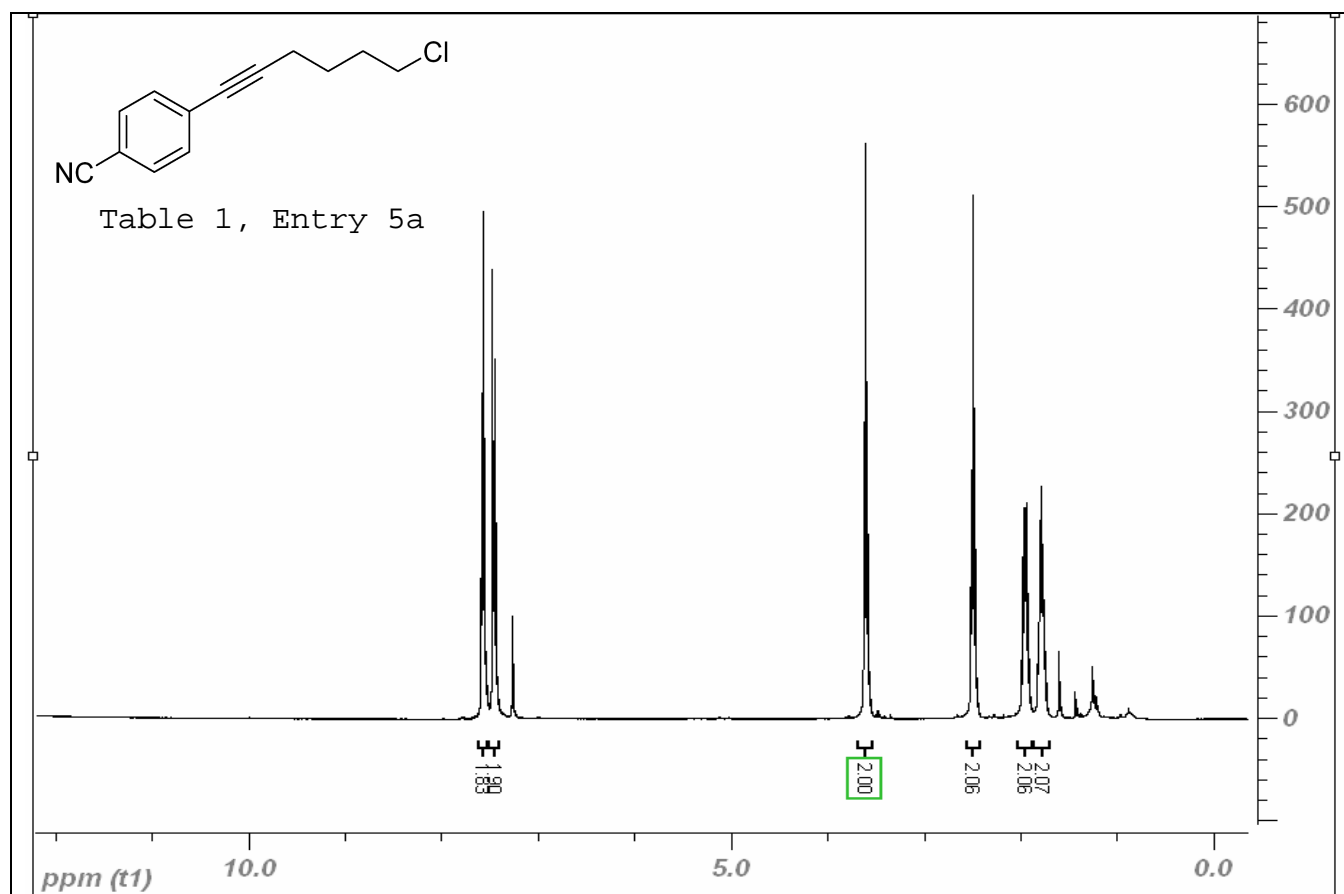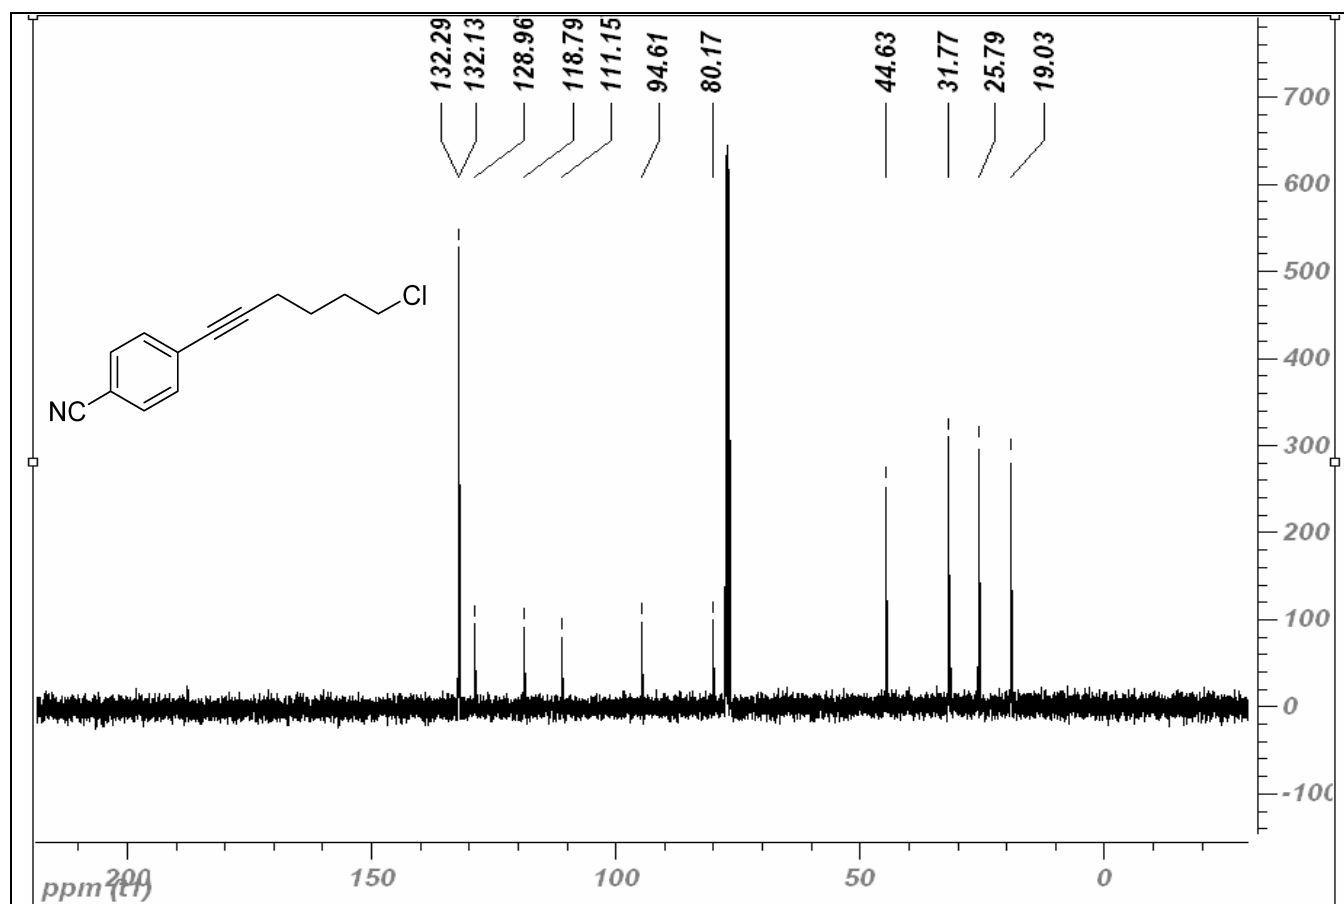

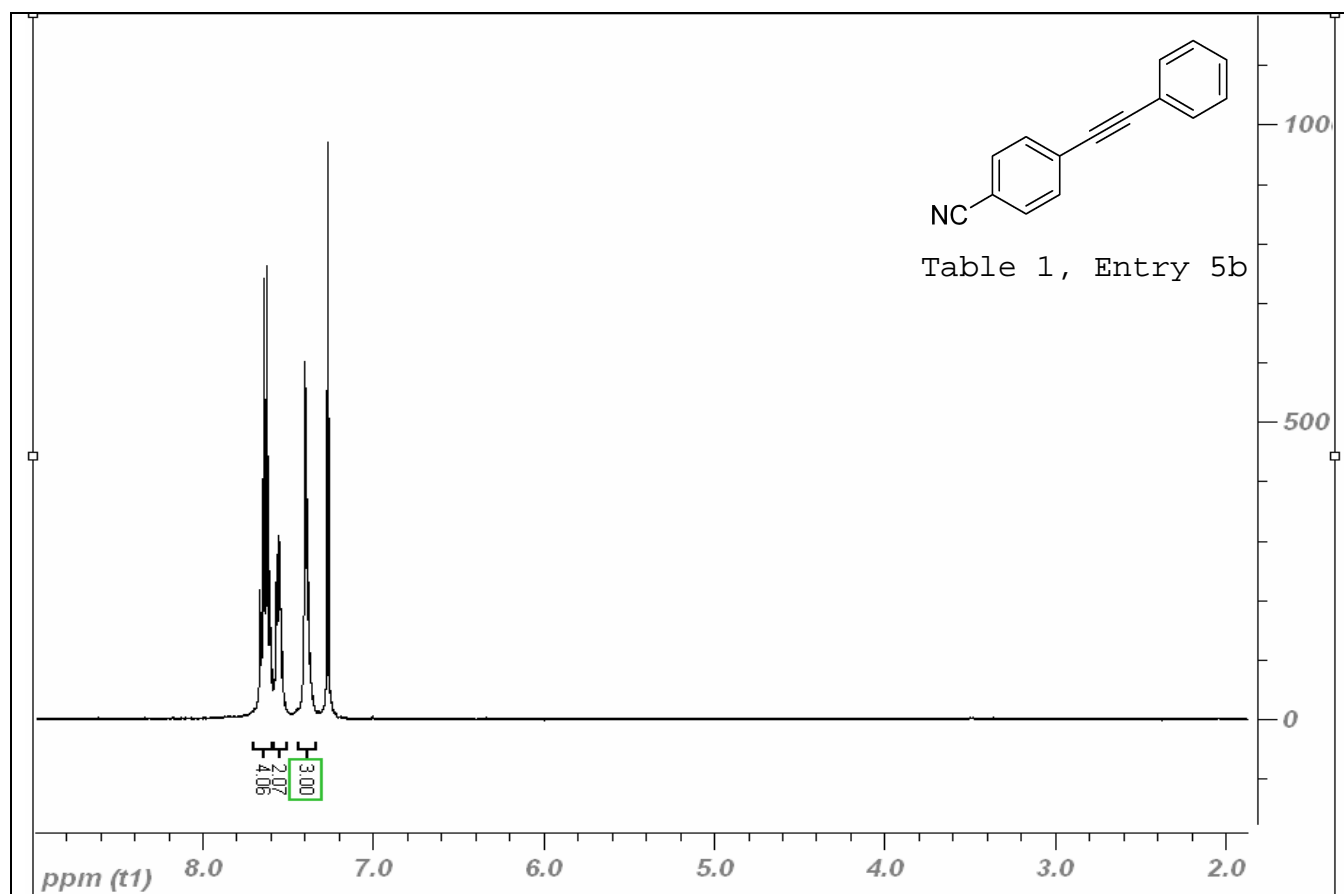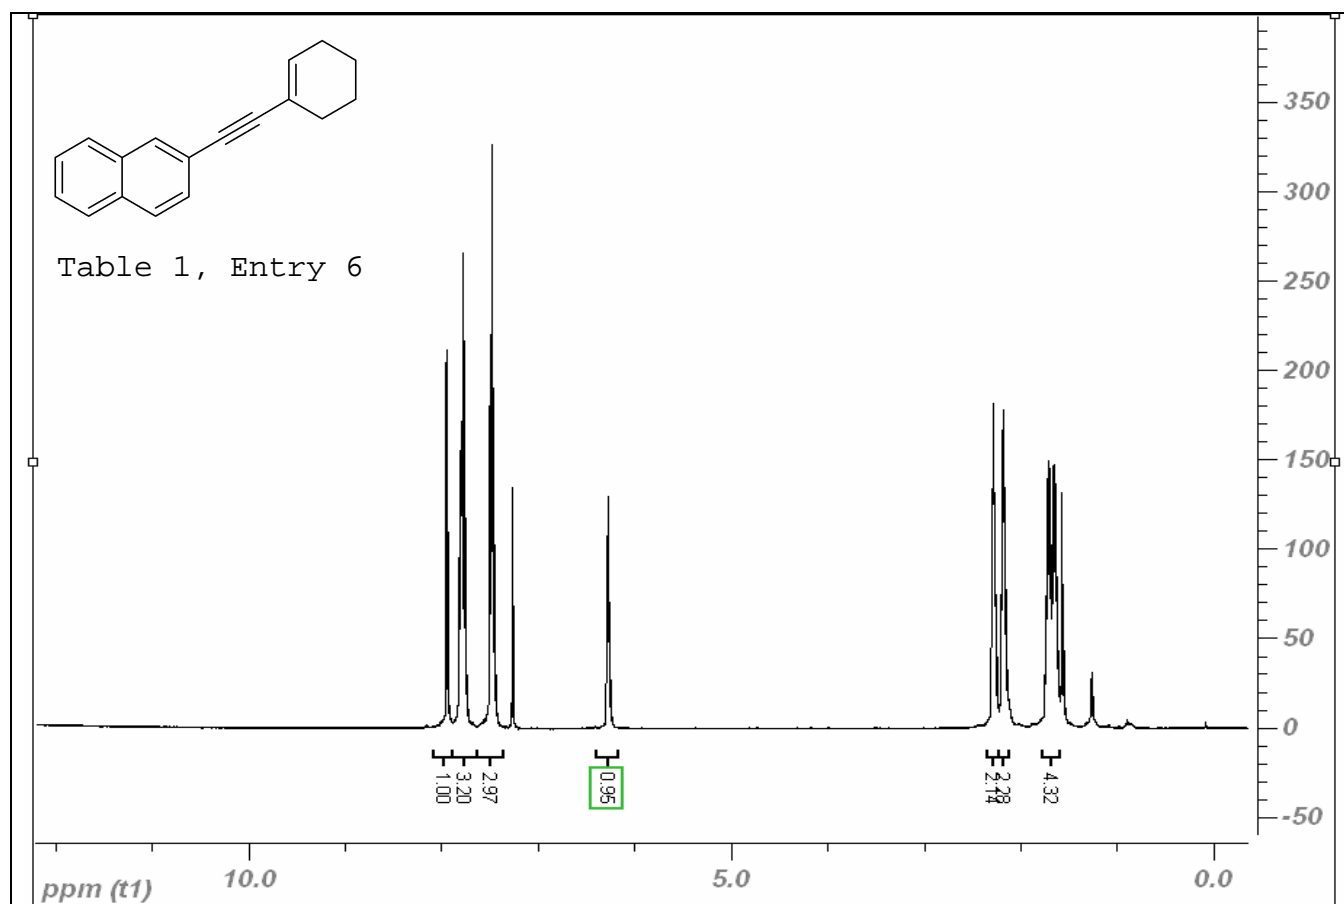

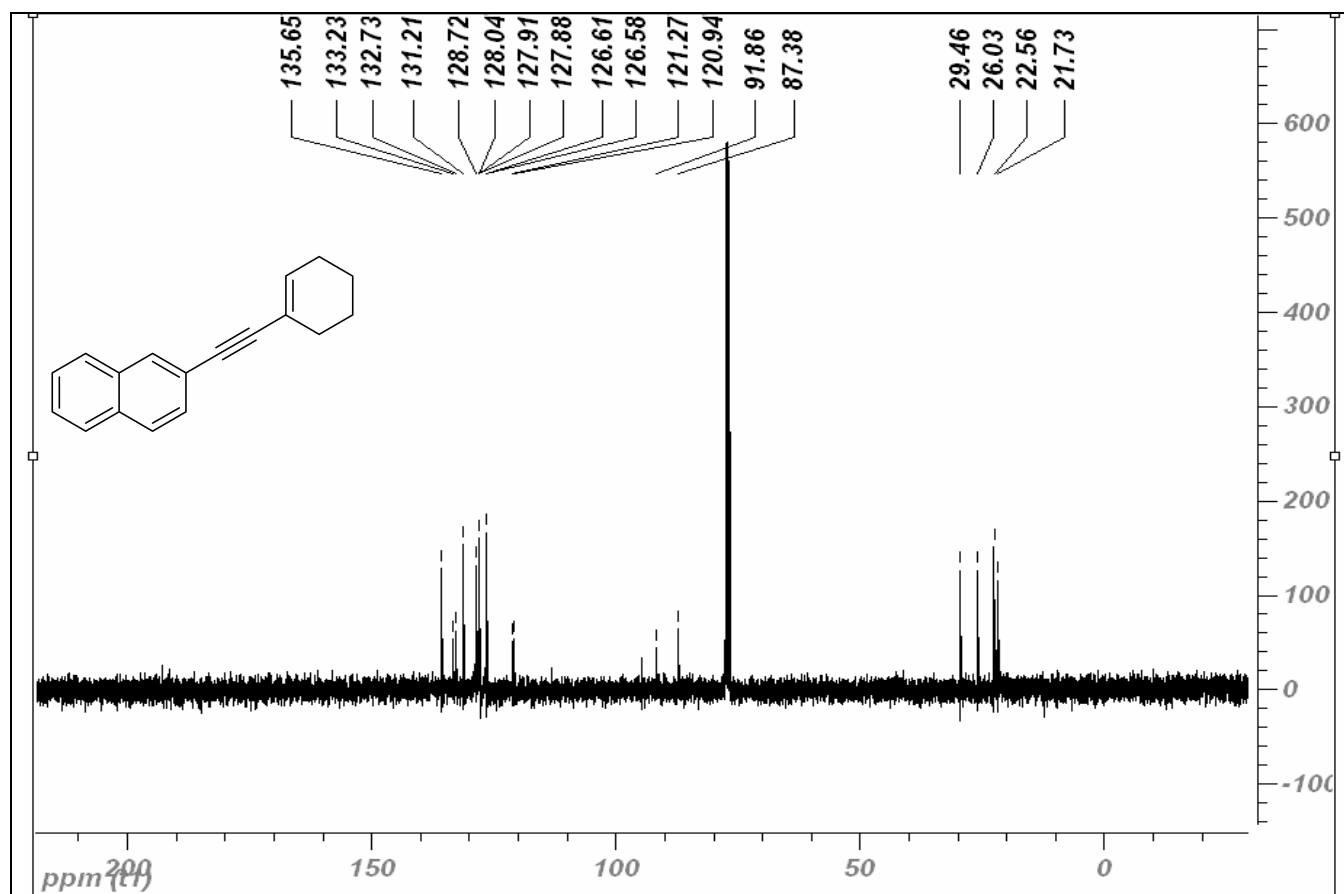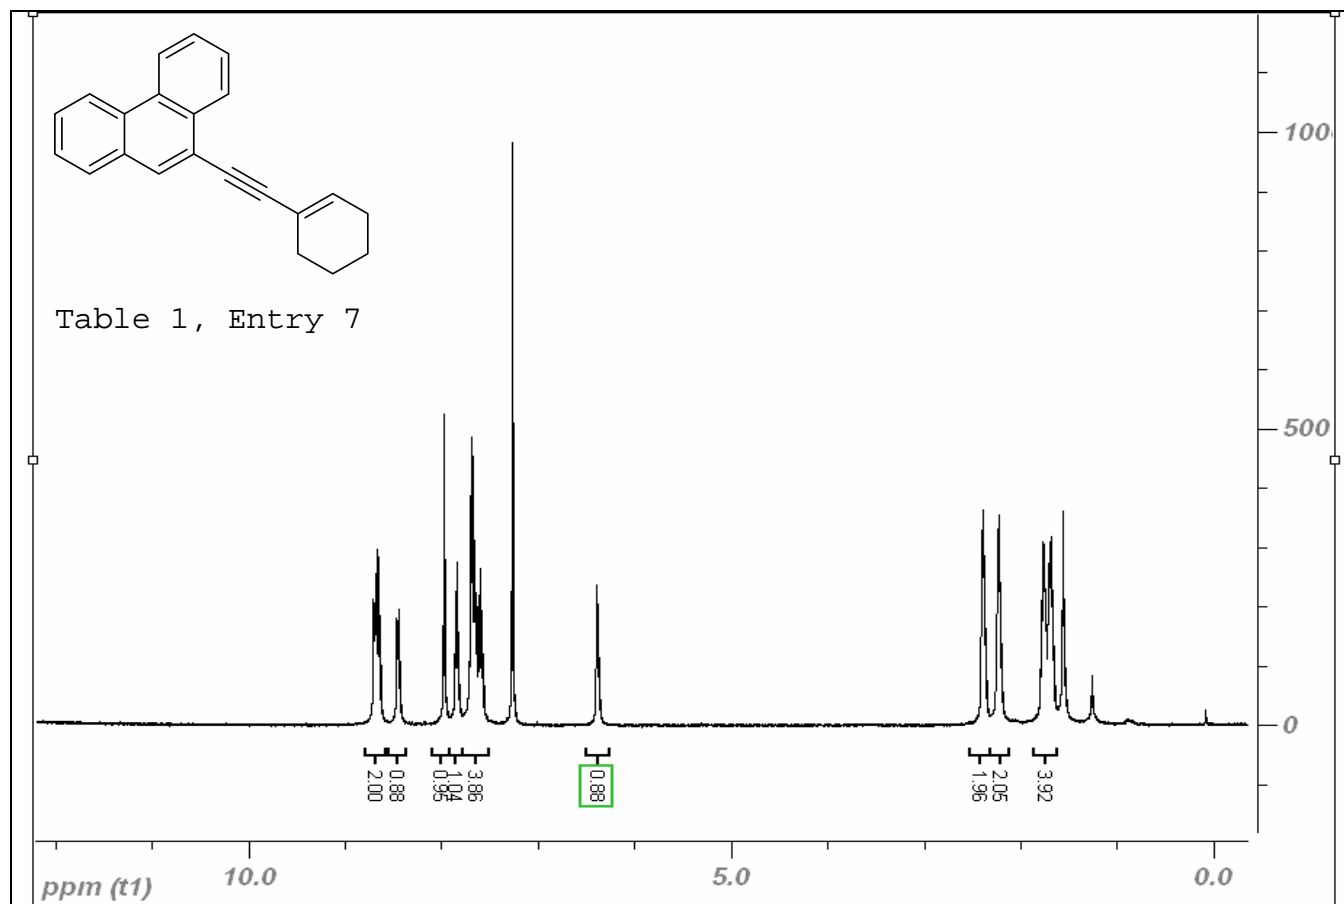

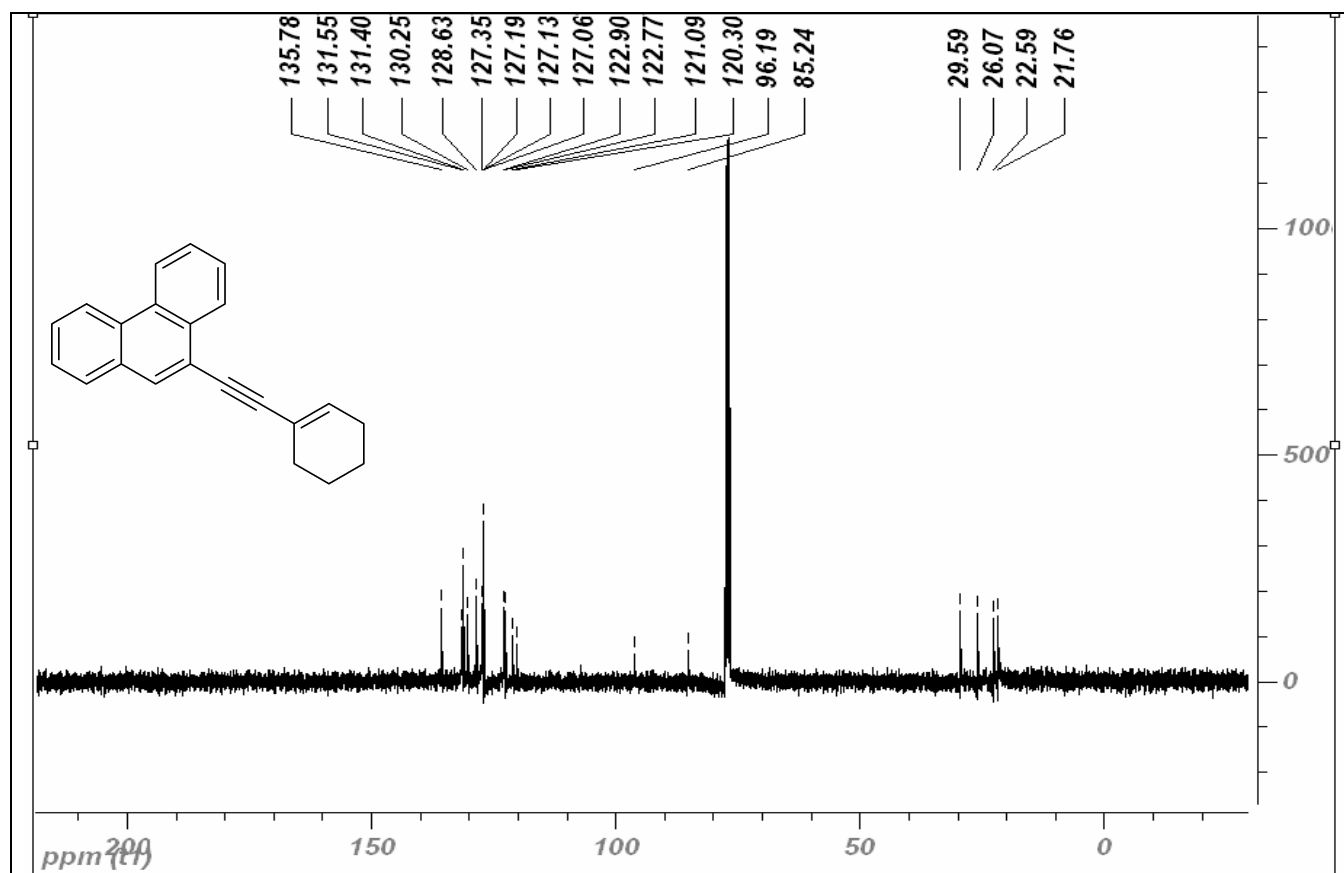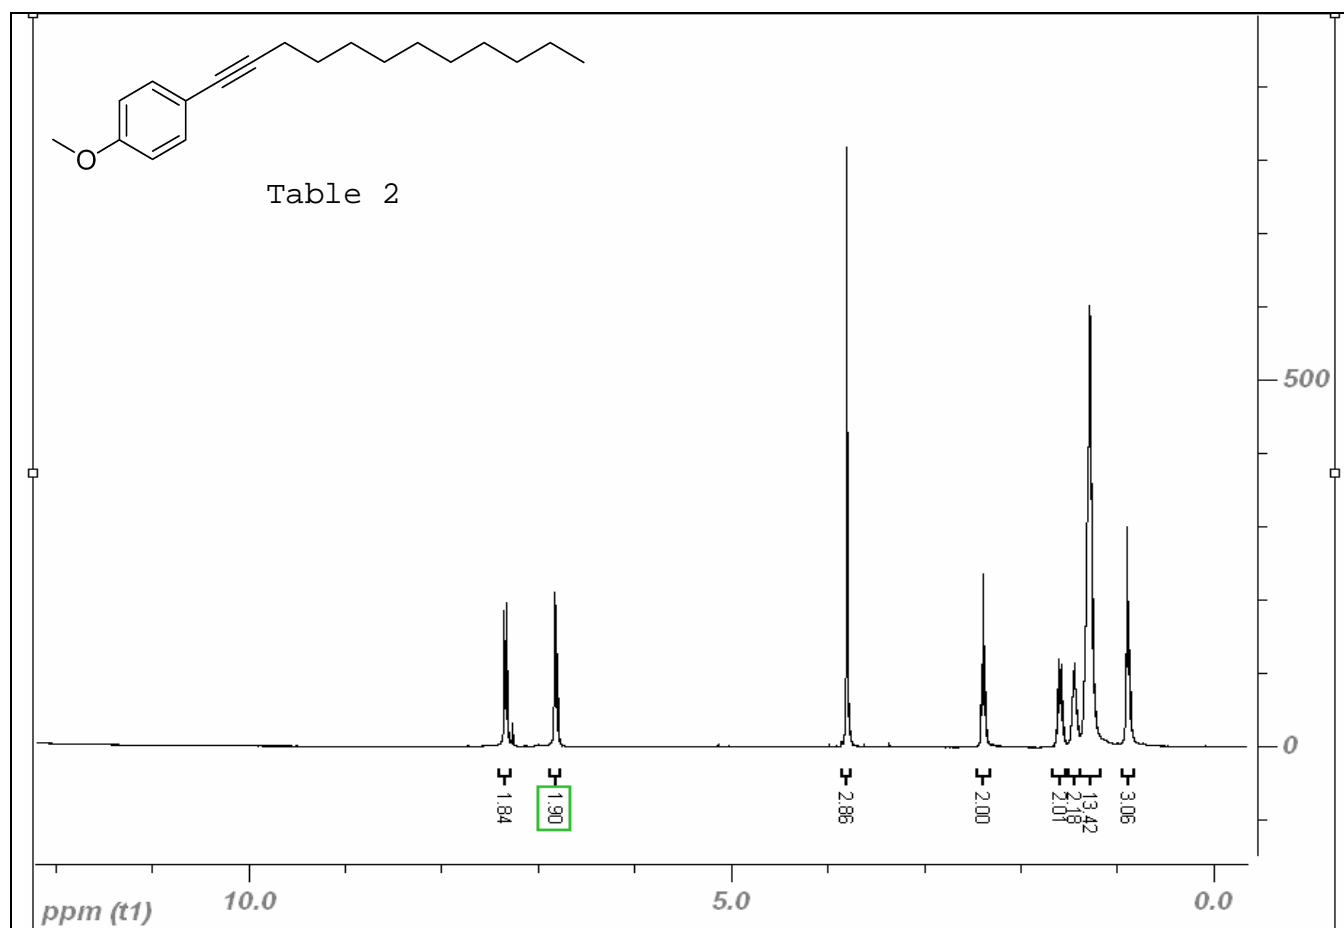

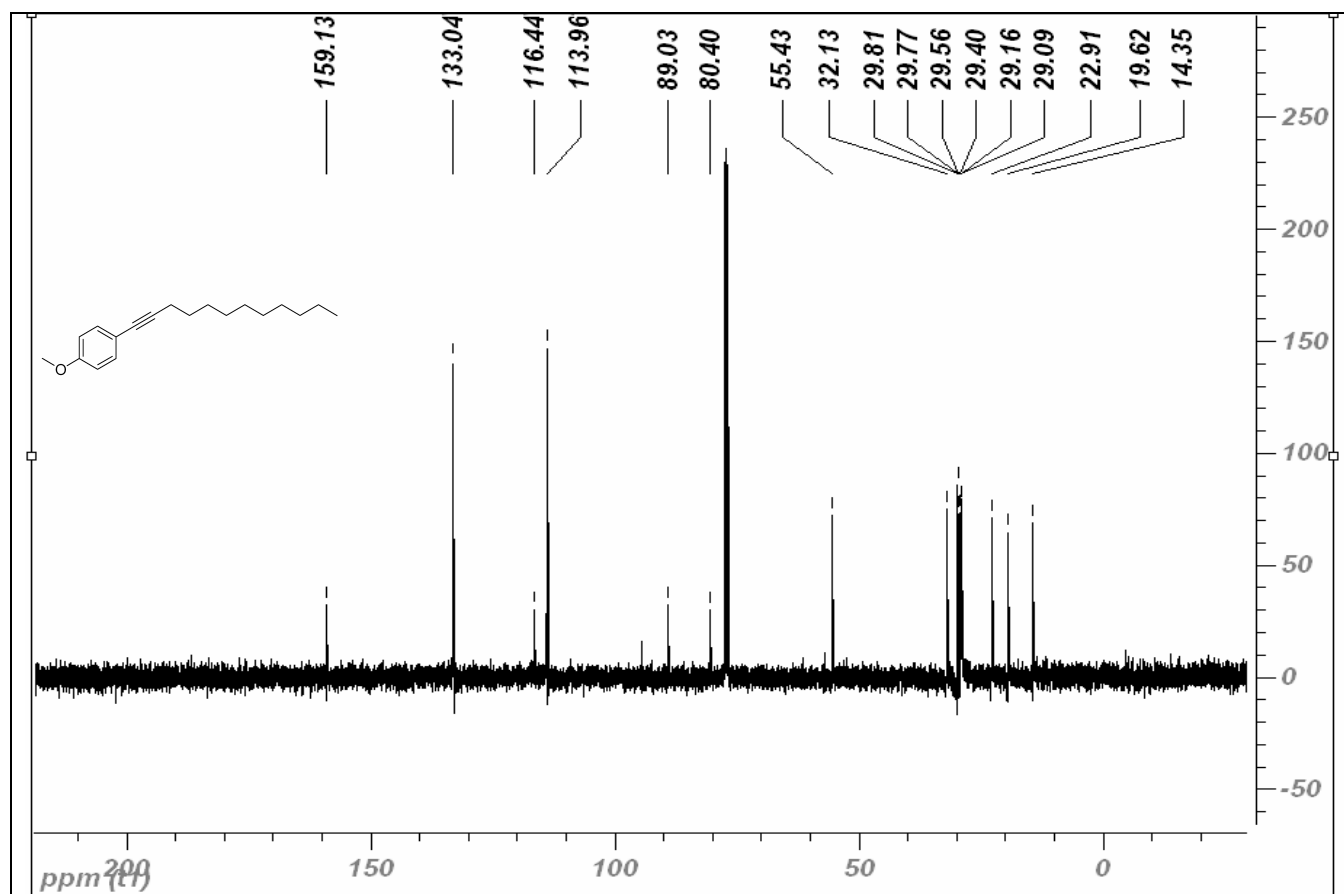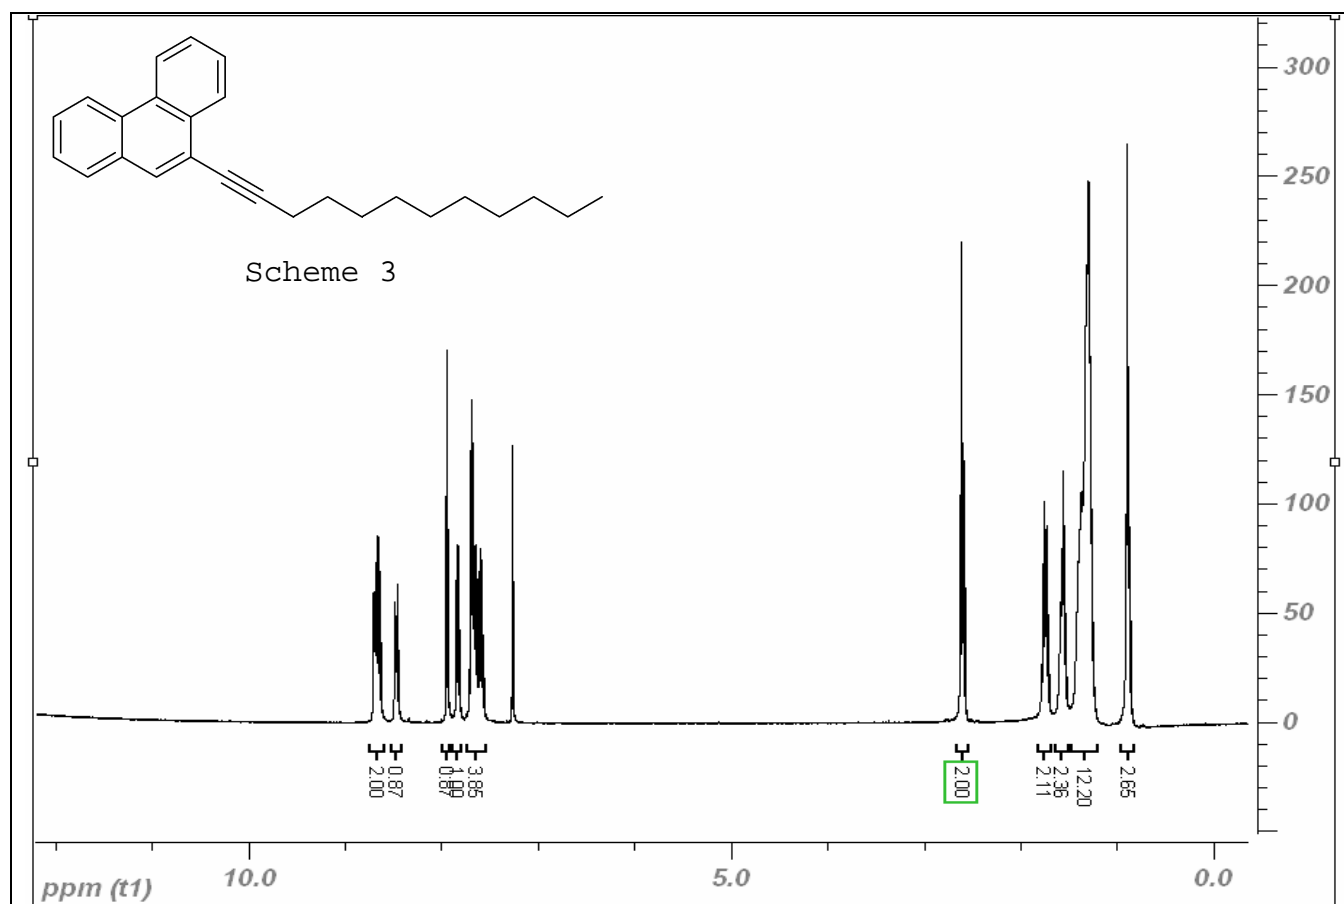

BLR-190-1, light yellow solid after chro  
matography, 3-05-2008  
exp8 std13c

SAMPLE DEC. & VT  
date Mar 5 2008 dfrq 399.950  
solvent CDC13 dn H1  
file exp 42  
ACQUISITION  
sfreq 100.577 dm -1099.0  
in C13 dmm YYY  
at 0.640 dmf 11106  
np 32000 dseq W  
sw 25000.0 dres 1.0  
fb 14000 homo  
bs 4 PROCESSING 1.00  
tpwr 50 lb write  
pw 10.0 write  
di 7.000 proc ft  
tof tn 65536  
nt 1e+03 math f  
cl 108  
atlock s wert  
gain not used wds  
f1 flags n wnt  
f2 n  
f3 n  
f4 n  
f5 n  
f6 n  
f7 n  
f8 n  
f9 n  
f10 n  
f11 n  
f12 n  
f13 n  
f14 n  
f15 n  
f16 n  
f17 n  
f18 n  
f19 n  
f20 n  
f21 n  
f22 n  
f23 n  
f24 n  
f25 n  
f26 n  
f27 n  
f28 n  
f29 n  
f30 n  
f31 n  
f32 n  
f33 n  
f34 n  
f35 n  
f36 n  
f37 n  
f38 n  
f39 n  
f40 n  
f41 n  
f42 n  
f43 n  
f44 n  
f45 n  
f46 n  
f47 n  
f48 n  
f49 n  
f50 n  
f51 n  
f52 n  
f53 n  
f54 n  
f55 n  
f56 n  
f57 n  
f58 n  
f59 n  
f60 n  
f61 n  
f62 n  
f63 n  
f64 n  
f65 n  
f66 n  
f67 n  
f68 n  
f69 n  
f70 n  
f71 n  
f72 n  
f73 n  
f74 n  
f75 n  
f76 n  
f77 n  
f78 n  
f79 n  
f80 n  
f81 n  
f82 n  
f83 n  
f84 n  
f85 n  
f86 n  
f87 n  
f88 n  
f89 n  
f90 n  
f91 n  
f92 n  
f93 n  
f94 n  
f95 n  
f96 n  
f97 n  
f98 n  
f99 n  
f100 n  
f101 n  
f102 n  
f103 n  
f104 n  
f105 n  
f106 n  
f107 n  
f108 n  
f109 n  
f110 n  
f111 n  
f112 n  
f113 n  
f114 n  
f115 n  
f116 n  
f117 n  
f118 n  
f119 n  
f120 n  
f121 n  
f122 n  
f123 n  
f124 n  
f125 n  
f126 n  
f127 n  
f128 n  
f129 n  
f130 n  
f131 n  
f132 n  
f133 n  
f134 n  
f135 n  
f136 n  
f137 n  
f138 n  
f139 n  
f140 n  
f141 n  
f142 n  
f143 n  
f144 n  
f145 n  
f146 n  
f147 n  
f148 n  
f149 n  
f150 n  
f151 n  
f152 n  
f153 n  
f154 n  
f155 n  
f156 n  
f157 n  
f158 n  
f159 n  
f160 n  
f161 n  
f162 n  
f163 n  
f164 n  
f165 n  
f166 n  
f167 n  
f168 n  
f169 n  
f170 n  
f171 n  
f172 n  
f173 n  
f174 n  
f175 n  
f176 n  
f177 n  
f178 n  
f179 n  
f180 n  
f181 n  
f182 n  
f183 n  
f184 n  
f185 n  
f186 n  
f187 n  
f188 n  
f189 n  
f190 n  
f191 n  
f192 n  
f193 n  
f194 n  
f195 n  
f196 n  
f197 n  
f198 n  
f199 n  
f200 n  
f201 n  
f202 n  
f203 n  
f204 n  
f205 n  
f206 n  
f207 n  
f208 n  
f209 n  
f210 n  
f211 n  
f212 n  
f213 n  
f214 n  
f215 n  
f216 n  
f217 n  
f218 n  
f219 n  
f220 n  
f221 n  
f222 n  
f223 n  
f224 n  
f225 n  
f226 n  
f227 n  
f228 n  
f229 n  
f230 n  
f231 n  
f232 n  
f233 n  
f234 n  
f235 n  
f236 n  
f237 n  
f238 n  
f239 n  
f240 n  
f241 n  
f242 n  
f243 n  
f244 n  
f245 n  
f246 n  
f247 n  
f248 n  
f249 n  
f250 n  
f251 n  
f252 n  
f253 n  
f254 n  
f255 n  
f256 n  
f257 n  
f258 n  
f259 n  
f260 n  
f261 n  
f262 n  
f263 n  
f264 n  
f265 n  
f266 n  
f267 n  
f268 n  
f269 n  
f270 n  
f271 n  
f272 n  
f273 n  
f274 n  
f275 n  
f276 n  
f277 n  
f278 n  
f279 n  
f280 n  
f281 n  
f282 n  
f283 n  
f284 n  
f285 n  
f286 n  
f287 n  
f288 n  
f289 n  
f290 n  
f291 n  
f292 n  
f293 n  
f294 n  
f295 n  
f296 n  
f297 n  
f298 n  
f299 n  
f300 n  
f301 n  
f302 n  
f303 n  
f304 n  
f305 n  
f306 n  
f307 n  
f308 n  
f309 n  
f310 n  
f311 n  
f312 n  
f313 n  
f314 n  
f315 n  
f316 n  
f317 n  
f318 n  
f319 n  
f320 n  
f321 n  
f322 n  
f323 n  
f324 n  
f325 n  
f326 n  
f327 n  
f328 n  
f329 n  
f330 n  
f331 n  
f332 n  
f333 n  
f334 n  
f335 n  
f336 n  
f337 n  
f338 n  
f339 n  
f340 n  
f341 n  
f342 n  
f343 n  
f344 n  
f345 n  
f346 n  
f347 n  
f348 n  
f349 n  
f350 n  
f351 n  
f352 n  
f353 n  
f354 n  
f355 n  
f356 n  
f357 n  
f358 n  
f359 n  
f360 n  
f361 n  
f362 n  
f363 n  
f364 n  
f365 n  
f366 n  
f367 n  
f368 n  
f369 n  
f370 n  
f371 n  
f372 n  
f373 n  
f374 n  
f375 n  
f376 n  
f377 n  
f378 n  
f379 n  
f380 n  
f381 n  
f382 n  
f383 n  
f384 n  
f385 n  
f386 n  
f387 n  
f388 n  
f389 n  
f390 n  
f391 n  
f392 n  
f393 n  
f394 n  
f395 n  
f396 n  
f397 n  
f398 n  
f399 n  
f400 n  
f401 n  
f402 n  
f403 n  
f404 n  
f405 n  
f406 n  
f407 n  
f408 n  
f409 n  
f410 n  
f411 n  
f412 n  
f413 n  
f414 n  
f415 n  
f416 n  
f417 n  
f418 n  
f419 n  
f420 n  
f421 n  
f422 n  
f423 n  
f424 n  
f425 n  
f426 n  
f427 n  
f428 n  
f429 n  
f430 n  
f431 n  
f432 n  
f433 n  
f434 n  
f435 n  
f436 n  
f437 n  
f438 n  
f439 n  
f440 n  
f441 n  
f442 n  
f443 n  
f444 n  
f445 n  
f446 n  
f447 n  
f448 n  
f449 n  
f450 n  
f451 n  
f452 n  
f453 n  
f454 n  
f455 n  
f456 n  
f457 n  
f458 n  
f459 n  
f460 n  
f461 n  
f462 n  
f463 n  
f464 n  
f465 n  
f466 n  
f467 n  
f468 n  
f469 n  
f470 n  
f471 n  
f472 n  
f473 n  
f474 n  
f475 n  
f476 n  
f477 n  
f478 n  
f479 n  
f480 n  
f481 n  
f482 n  
f483 n  
f484 n  
f485 n  
f486 n  
f487 n  
f488 n  
f489 n  
f490 n  
f491 n  
f492 n  
f493 n  
f494 n  
f495 n  
f496 n  
f497 n  
f498 n  
f499 n  
f500 n  
f501 n  
f502 n  
f503 n  
f504 n  
f505 n  
f506 n  
f507 n  
f508 n  
f509 n  
f510 n  
f511 n  
f512 n  
f513 n  
f514 n  
f515 n  
f516 n  
f517 n  
f518 n  
f519 n  
f520 n  
f521 n  
f522 n  
f523 n  
f524 n  
f525 n  
f526 n  
f527 n  
f528 n  
f529 n  
f530 n  
f531 n  
f532 n  
f533 n  
f534 n  
f535 n  
f536 n  
f537 n  
f538 n  
f539 n  
f540 n  
f541 n  
f542 n  
f543 n  
f544 n  
f545 n  
f546 n  
f547 n  
f548 n  
f549 n  
f550 n  
f551 n  
f552 n  
f553 n  
f554 n  
f555 n  
f556 n  
f557 n  
f558 n  
f559 n  
f560 n  
f561 n  
f562 n  
f563 n  
f564 n  
f565 n  
f566 n  
f567 n  
f568 n  
f569 n  
f570 n  
f571 n  
f572 n  
f573 n  
f574 n  
f575 n  
f576 n  
f577 n  
f578 n  
f579 n  
f580 n  
f581 n  
f582 n  
f583 n  
f584 n  
f585 n  
f586 n  
f587 n  
f588 n  
f589 n  
f590 n  
f591 n  
f592 n  
f593 n  
f594 n  
f595 n  
f596 n  
f597 n  
f598 n  
f599 n  
f600 n  
f601 n  
f602 n  
f603 n  
f604 n  
f605 n  
f606 n  
f607 n  
f608 n  
f609 n  
f610 n  
f611 n  
f612 n  
f613 n  
f614 n  
f615 n  
f616 n  
f617 n  
f618 n  
f619 n  
f620 n  
f621 n  
f622 n  
f623 n  
f624 n  
f625 n  
f626 n  
f627 n  
f628 n  
f629 n  
f630 n  
f631 n  
f632 n  
f633 n  
f634 n  
f635 n  
f636 n  
f637 n  
f638 n  
f639 n  
f640 n  
f641 n  
f642 n  
f643 n  
f644 n  
f645 n  
f646 n  
f647 n  
f648 n  
f649 n  
f650 n  
f651 n  
f652 n  
f653 n  
f654 n  
f655 n  
f656 n  
f657 n  
f658 n  
f659 n  
f660 n  
f661 n  
f662 n  
f663 n  
f664 n  
f665 n  
f666 n  
f667 n  
f668 n  
f669 n  
f670 n  
f671 n  
f672 n  
f673 n  
f674 n  
f675 n  
f676 n  
f677 n  
f678 n  
f679 n  
f680 n  
f681 n  
f682 n  
f683 n  
f684 n  
f685 n  
f686 n  
f687 n  
f688 n  
f689 n  
f690 n  
f691 n  
f692 n  
f693 n  
f694 n  
f695 n  
f696 n  
f697 n  
f698 n  
f699 n  
f700 n  
f701 n  
f702 n  
f703 n  
f704 n  
f705 n  
f706 n  
f707 n  
f708 n  
f709 n  
f710 n  
f711 n  
f712 n  
f713 n  
f714 n  
f715 n  
f716 n  
f717 n  
f718 n  
f719 n  
f720 n  
f721 n  
f722 n  
f723 n  
f724 n  
f725 n  
f726 n  
f727 n  
f728 n  
f729 n  
f730 n  
f731 n  
f732 n  
f733 n  
f734 n  
f735 n  
f736 n  
f737 n  
f738 n  
f739 n  
f740 n  
f741 n  
f742 n  
f743 n  
f744 n  
f745 n  
f746 n  
f747 n  
f748 n  
f749 n  
f750 n  
f751 n  
f752 n  
f753 n  
f754 n  
f755 n  
f756 n  
f757 n  
f758 n  
f759 n  
f760 n  
f761 n  
f762 n  
f763 n  
f764 n  
f765 n  
f766 n  
f767 n  
f768 n  
f769 n  
f770 n  
f771 n  
f772 n  
f773 n  
f774 n  
f775 n  
f776 n  
f777 n  
f778 n  
f779 n  
f780 n  
f781 n  
f782 n  
f783 n  
f784 n  
f785 n  
f786 n  
f787 n  
f788 n  
f789 n  
f790 n  
f791 n  
f792 n  
f793 n  
f794 n  
f795 n  
f796 n  
f797 n  
f798 n  
f799 n  
f800 n  
f801 n  
f802 n  
f803 n  
f804 n  
f805 n  
f806 n  
f807 n  
f808 n  
f809 n  
f810 n  
f811 n  
f812 n  
f813 n  
f814 n  
f815 n  
f816 n  
f817 n  
f818 n  
f819 n  
f820 n  
f821 n  
f822 n  
f823 n  
f824 n  
f825 n  
f826 n  
f827 n  
f828 n  
f829 n  
f830 n  
f831 n  
f832 n  
f833 n  
f834 n  
f835 n  
f836 n  
f837 n  
f838 n  
f839 n  
f840 n  
f841 n  
f842 n  
f843 n  
f844 n  
f845 n  
f846 n  
f847 n  
f848 n  
f849 n  
f850 n  
f851 n  
f852 n  
f853 n  
f854 n  
f855 n  
f856 n  
f857 n  
f858 n  
f859 n  
f860 n  
f861 n  
f862 n  
f863 n  
f864 n  
f865 n  
f866 n  
f867 n  
f868 n  
f869 n  
f870 n  
f871 n  
f872 n  
f873 n  
f874 n  
f875 n  
f876 n  
f877 n  
f878 n  
f879 n  
f880 n  
f881 n  
f882 n  
f883 n  
f884 n  
f885 n  
f886 n  
f887 n  
f888 n  
f889 n  
f890 n  
f891 n  
f892 n  
f893 n  
f894 n  
f895 n  
f896 n  
f897 n  
f898 n  
f899 n  
f900 n  
f901 n  
f902 n  
f903 n  
f904 n  
f905 n  
f906 n  
f907 n  
f908 n  
f909 n  
f910 n  
f911 n  
f912 n  
f913 n  
f914 n  
f915 n  
f916 n  
f917 n  
f918 n  
f919 n  
f920 n  
f921 n  
f922 n  
f923 n  
f924 n  
f925 n  
f926 n  
f927 n  
f928 n  
f929 n  
f930 n  
f931 n  
f932 n  
f933 n  
f934 n  
f935 n  
f936 n  
f937 n  
f938 n  
f939 n  
f940 n  
f941 n  
f942 n  
f943 n  
f944 n  
f945 n  
f946 n  
f947 n  
f948 n  
f949 n  
f950 n  
f951 n  
f952 n  
f953 n  
f954 n  
f955 n  
f956 n  
f957 n  
f958 n  
f959 n  
f960 n  
f961 n  
f962 n  
f963 n  
f964 n  
f965 n  
f966 n  
f967 n  
f968 n  
f969 n  
f970 n  
f971 n  
f972 n  
f973 n  
f974 n  
f975 n  
f976 n  
f977 n  
f978 n  
f979 n  
f980 n  
f981 n  
f982 n  
f983 n  
f984 n  
f985 n  
f986 n  
f987 n  
f988 n  
f989 n  
f990 n  
f991 n  
f992 n  
f993 n  
f994 n  
f995 n  
f996 n  
f997 n  
f998 n  
f999 n  
f1000 n  
f1001 n  
f1002 n  
f1003 n  
f1004 n  
f1005 n  
f1006 n  
f1007 n  
f1008 n  
f1009 n  
f1010 n  
f1011 n  
f1012 n  
f1013 n  
f1014 n  
f1015 n  
f1016 n  
f1017 n  
f1018 n  
f1019 n  
f1020 n  
f1021 n  
f1022 n  
f1023 n  
f1024 n  
f1025 n  
f1026 n  
f1027 n  
f1028 n  
f1029 n  
f1030 n  
f1031 n  
f1032 n  
f1033 n  
f1034 n  
f1035 n  
f1036 n  
f1037 n  
f1038 n  
f1039 n  
f1040 n  
f1041 n  
f1042 n  
f1043 n  
f1044 n  
f1045 n  
f1046 n  
f1047 n  
f1048 n  
f1049 n  
f1050 n  
f1051 n  
f1052 n  
f1053 n  
f1054 n  
f1055 n  
f1056 n  
f1057 n  
f1058 n  
f1059 n  
f1060 n  
f1061 n  
f1062 n  
f1063 n  
f1064 n  
f1065 n  
f1066 n  
f1067 n  
f1068 n  
f1069 n  
f1070 n  
f1071 n  
f1072 n  
f1073 n  
f1074 n  
f1075 n  
f1076 n  
f1077 n  
f1078 n  
f1079 n  
f1080 n  
f1081 n  
f1082 n  
f1083 n  
f1084 n  
f1085 n  
f1086 n  
f1087 n  
f1088 n  
f1089 n  
f1090 n  
f1091 n  
f1092 n  
f1093 n  
f1094 n  
f1095 n  
f1096 n  
f1097 n  
f1098 n  
f1099 n  
f1100 n  
f1101 n  
f1102 n  
f1103 n  
f1104 n  
f1105 n  
f1106 n  
f1107 n  
f1108 n  
f1109 n  
f1110 n  
f1111 n  
f1112 n  
f1113 n  
f1114 n  
f1115 n  
f1116 n  
f1117 n  
f1118 n  
f1119 n  
f1120 n  
f1121 n  
f1122 n  
f1123 n  
f1124 n  
f1125 n  
f1126 n  
f1127 n  
f1128 n  
f1129 n  
f1130 n  
f1131 n  
f1132 n  
f1133 n  
f1134 n  
f1135 n  
f1136 n  
f1137 n  
f1138 n  
f1139 n  
f1140 n  
f1141 n  
f1142 n  
f1143 n  
f1144 n  
f1145 n  
f1146 n  
f1147 n  
f1148 n  
f1149 n  
f1150 n  
f1151 n  
f1152 n  
f1153 n  
f1154 n  
f1155 n  
f1156 n  
f1157 n  
f1158 n  
f1159 n  
f1160 n  
f1161 n  
f1162 n  
f1163 n  
f1164 n  
f1165 n  
f1166 n  
f1167 n  
f1168 n  
f1169 n  
f1170 n  
f1171 n  
f1172 n  
f1173 n  
f1174 n  
f1175 n  
f1176 n  
f1177 n  
f1178 n  
f1179 n  
f1180 n  
f1181 n  
f1182 n  
f1183 n  
f1184 n  
f1185 n  
f1186 n  
f1187 n  
f1188 n  
f1189 n  
f1190 n  
f1191 n  
f1192 n  
f1193 n  
f1194 n  
f1195 n  
f1196 n  
f1197 n  
f1198 n  
f1199 n  
f1200 n  
f1201 n  
f1202 n  
f1203 n  
f1204 n  
f1205 n  
f1206 n  
f1207 n  
f1208 n  
f1209 n  
f1210 n  
f1211 n  
f1212 n  
f1213 n  
f1214 n  
f1215 n  
f1216 n  
f1217 n  
f1218 n  
f1219 n  
f1220 n  
f1221 n  
f1222 n  
f1223 n  
f1224 n  
f1225 n  
f1226 n  
f1227 n  
f1228 n  
f1229 n  
f1230 n  
f1231 n  
f1232 n  
f1233 n  
f1234 n  
f1235 n  
f1236 n  
f1237 n  
f1238 n  
f1239 n  
f1240 n  
f1241 n  
f1242 n  
f1243 n  
f1244 n  
f1245 n  
f1246 n  
f1247 n  
f1248 n  
f1249 n  
f1250 n  
f1251 n  
f1252 n  
f1253 n  
f1254 n  
f1255 n  
f1256 n  
f1257 n  
f1258 n  
f1259 n  
f1260 n  
f1261 n  
f1262 n  
f1263 n  
f1264 n  
f1265 n  
f1266 n  
f1267 n  
f1268 n  
f1269 n  
f1270 n  
f1271 n  
f1272 n  
f1273 n  
f1274 n  
f1275 n  
f1276 n  
f1277 n  
f1278 n  
f1279 n  
f1280 n  
f1281 n  
f1282 n  
f1283 n  
f1284 n  
f1285 n  
f1286 n  
f1287 n  
f1288 n  
f1289 n  
f1290 n  
f1291 n  
f1292 n  
f1293 n  
f1294 n  
f1295 n  
f1296 n  
f1297 n  
f1298 n  
f1299 n  
f1300 n  
f1301 n  
f1302 n  
f1303 n  
f1304 n  
f1305 n  
f1306 n  
f1307 n  
f1308 n  
f1309 n  
f1310 n  
f1311 n  
f1312 n  
f1313 n  
f1314 n  
f1315 n  
f1316 n  
f1317 n  
f1318 n  
f1319 n  
f1320 n  
f1321 n  
f1322 n  
f1323 n  
f1324 n  
f1325 n  
f1326 n  
f1327 n  
f1328 n  
f1329 n  
f1330 n  
f1331 n  
f1332 n  
f1333 n  
f1334 n  
f1335 n  
f1336 n  
f1337 n  
f1338 n  
f1339 n  
f1340 n  
f1341 n  
f1342 n  
f1343 n  
f1344 n  
f1345 n  
f1346 n  
f1347 n  
f1348 n  
f1349 n  
f1350 n  
f1351 n  
f1352 n  
f1353 n  
f1354 n  
f1355 n  
f1356 n  
f1357 n  
f1358 n  
f1359 n  
f1360 n  
f1361 n  
f1362 n  
f1363 n  
f1364 n  
f1365 n  
f1366 n  
f1367 n  
f1368 n  
f1369 n  
f1370 n  
f1371 n  
f1372 n  
f1373 n  
f1374 n  
f1375 n  
f1376 n  
f1377 n  
f1378 n  
f1379 n  
f1380 n  
f1381 n  
f1382 n  
f1383 n  
f1384 n  
f1385 n  
f1386 n  
f1387 n  
f1388 n  
f1389 n  
f1390 n  
f1391 n  
f1392 n  
f1393 n  
f1394 n  
f1395 n  
f1396 n  
f1397 n  
f1398 n  
f1399 n  
f1400 n  
f1401 n  
f1402 n  
f1403 n  
f1404 n  
f1405 n  
f1406 n  
f1407 n  
f1408 n  
f1409 n  
f1410 n  
f1411 n  
f1412 n  
f1413 n  
f1414 n  
f1415 n  
f1416 n  
f1417 n  
f1418 n  
f1419 n  
f1420 n  
f1421 n  
f1422 n  
f1423 n  
f1424 n  
f1425 n  
f1426 n  
f1427 n  
f1428 n  
f1429 n  
f1430 n  
f1431 n  
f1432 n  
f1433 n  
f1434 n  
f1435 n  
f1436 n  
f1437 n  
f1438 n  
f1439 n  
f1440 n  
f1441 n  
f1442 n  
f1443 n  
f1444 n  
f1445 n  
f1446 n  
f1447 n  
f1448 n  
f1449 n  
f1450 n  
f1451 n  
f1452 n  
f1453 n  
f1454 n  
f1455 n  
f1456 n  
f1457 n  
f1458 n  
f1459 n  
f1460 n  
f1461 n  
f1462 n  
f1463 n  
f1464 n  
f1465 n  
f1466 n  
f1467 n  
f1468 n  
f1469 n  
f1470 n  
f1471 n  
f1472 n  
f1473 n  
f1474 n  
f1475 n  
f1476 n  
f1477 n  
f1478 n  
f1479 n  
f1480 n  
f1481 n  
f1482 n  
f1483 n  
f1484 n  
f1485 n  
f1486 n  
f1487 n  
f1488 n  
f1489 n  
f1490 n  
f1491 n  
f1492 n  
f1493 n  
f1494 n  
f1495 n  
f1496 n  
f1497 n  
f1498 n  
f1499 n  
f1500 n  
f1501 n  
f1502 n  
f1503 n  
f1504 n  
f1505 n  
f1506 n  
f1507 n  
f1508 n  
f1509 n  
f1510 n  
f1511 n  
f1512 n  
f1513 n  
f1514 n  
f1515 n  
f1516 n  
f1517 n  
f1518 n  
f1519 n  
f1520 n  
f1521 n  
f1522 n  
f1523 n  
f1524 n  
f1525 n  
f1526 n  
f1527 n  
f1528 n  
f1529 n  
f1530 n  
f1531 n  
f1532 n  
f1533 n  
f1534 n  
f1535 n  
f1536 n  
f1537 n  
f1538 n  
f1539 n  
f1540 n  
f1541 n  
f1542 n  
f1543 n  
f1544 n  
f1545 n  
f1546 n  
f1547 n  
f1548 n  
f1549 n  
f1550 n  
f1551 n  
f1552 n  
f1553 n  
f1554 n  
f1555 n  
f1556 n  
f1557 n  
f1558 n  
f1559 n  
f1560 n  
f1561 n  
f1562 n  
f1563 n  
f1564 n  
f1565 n  
f1566 n  
f1567 n  
f1568 n  
f1569 n  
f1570 n  
f1571 n  
f1572 n  
f1573 n  
f1574 n  
f1575 n  
f1576 n  
f1577 n  
f1578 n  
f1579 n  
f1580 n  
f1581 n  
f1582 n  
f1583 n  
f1584 n  
f1585 n  
f1586 n  
f1587 n  
f1588 n  
f1589 n  
f1590 n  
f1591 n  
f1592 n  
f1593 n  
f1594 n  
f1595 n  
f1596 n  
f1597 n  
f1598 n  
f1599 n  
f1600 n  
f1601 n  
f1602 n  
f1603 n  
f1604 n  
f1605 n  
f1606 n  
f1607 n  
f1608 n  
f1609 n  
f1610 n  
f1611 n  
f1612 n  
f1613 n  
f1614 n  
f1615 n  
f1616 n  
f1617 n  
f1618 n  
f1619 n  
f1620 n  
f1621 n  
f1622 n  
f1623 n  
f1624 n  
f1625 n  
f1626 n  
f1627 n  
f1628 n  
f1629 n  
f1630 n  
f1631 n  
f1632 n  
f1633 n  
f1634 n  
f1635 n  
f1636 n  
f1637 n  
f1638 n  
f1639 n  
f1640 n  
f1641 n  
f1642 n  
f1643 n  
f1644 n  
f1645 n  
f1646



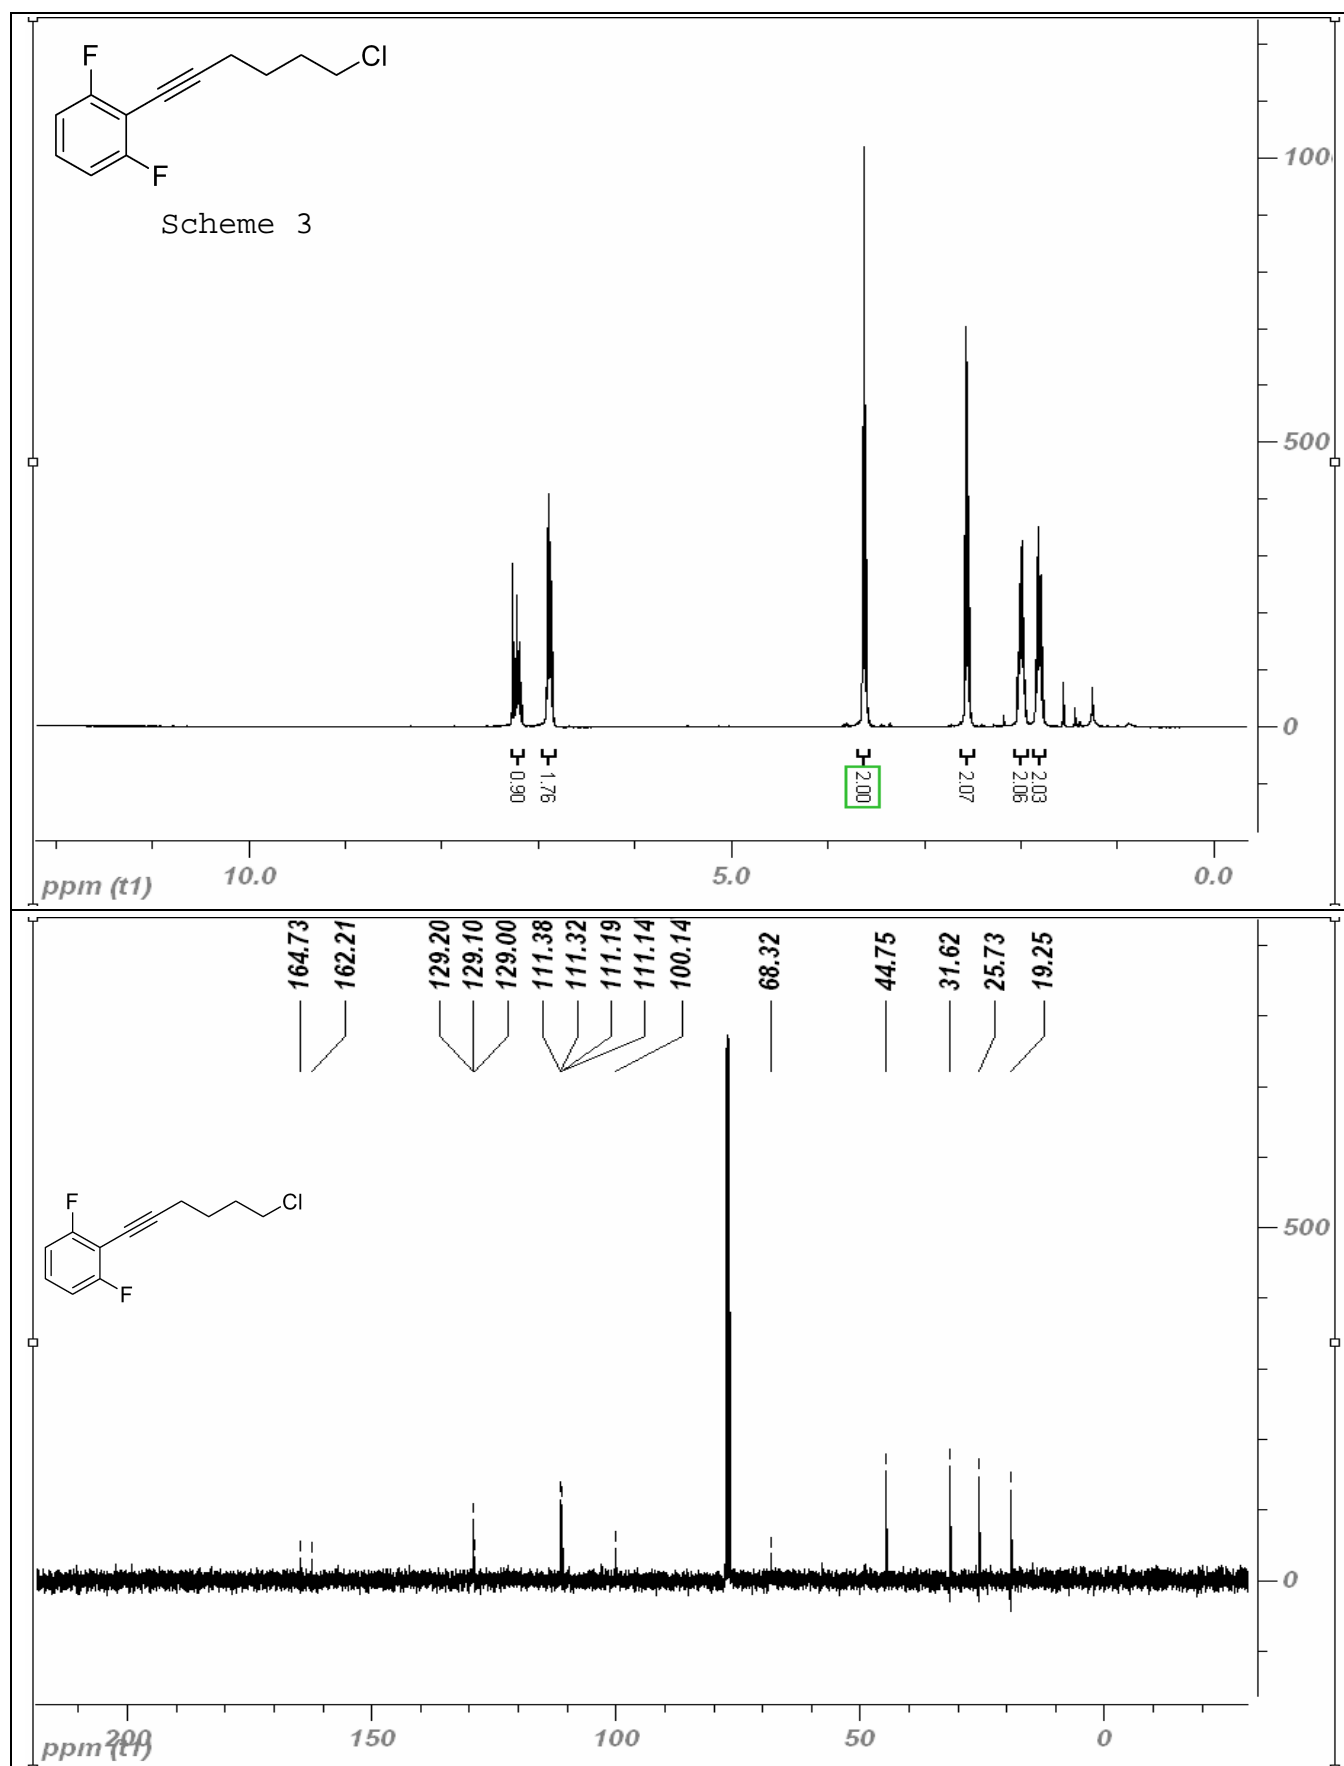

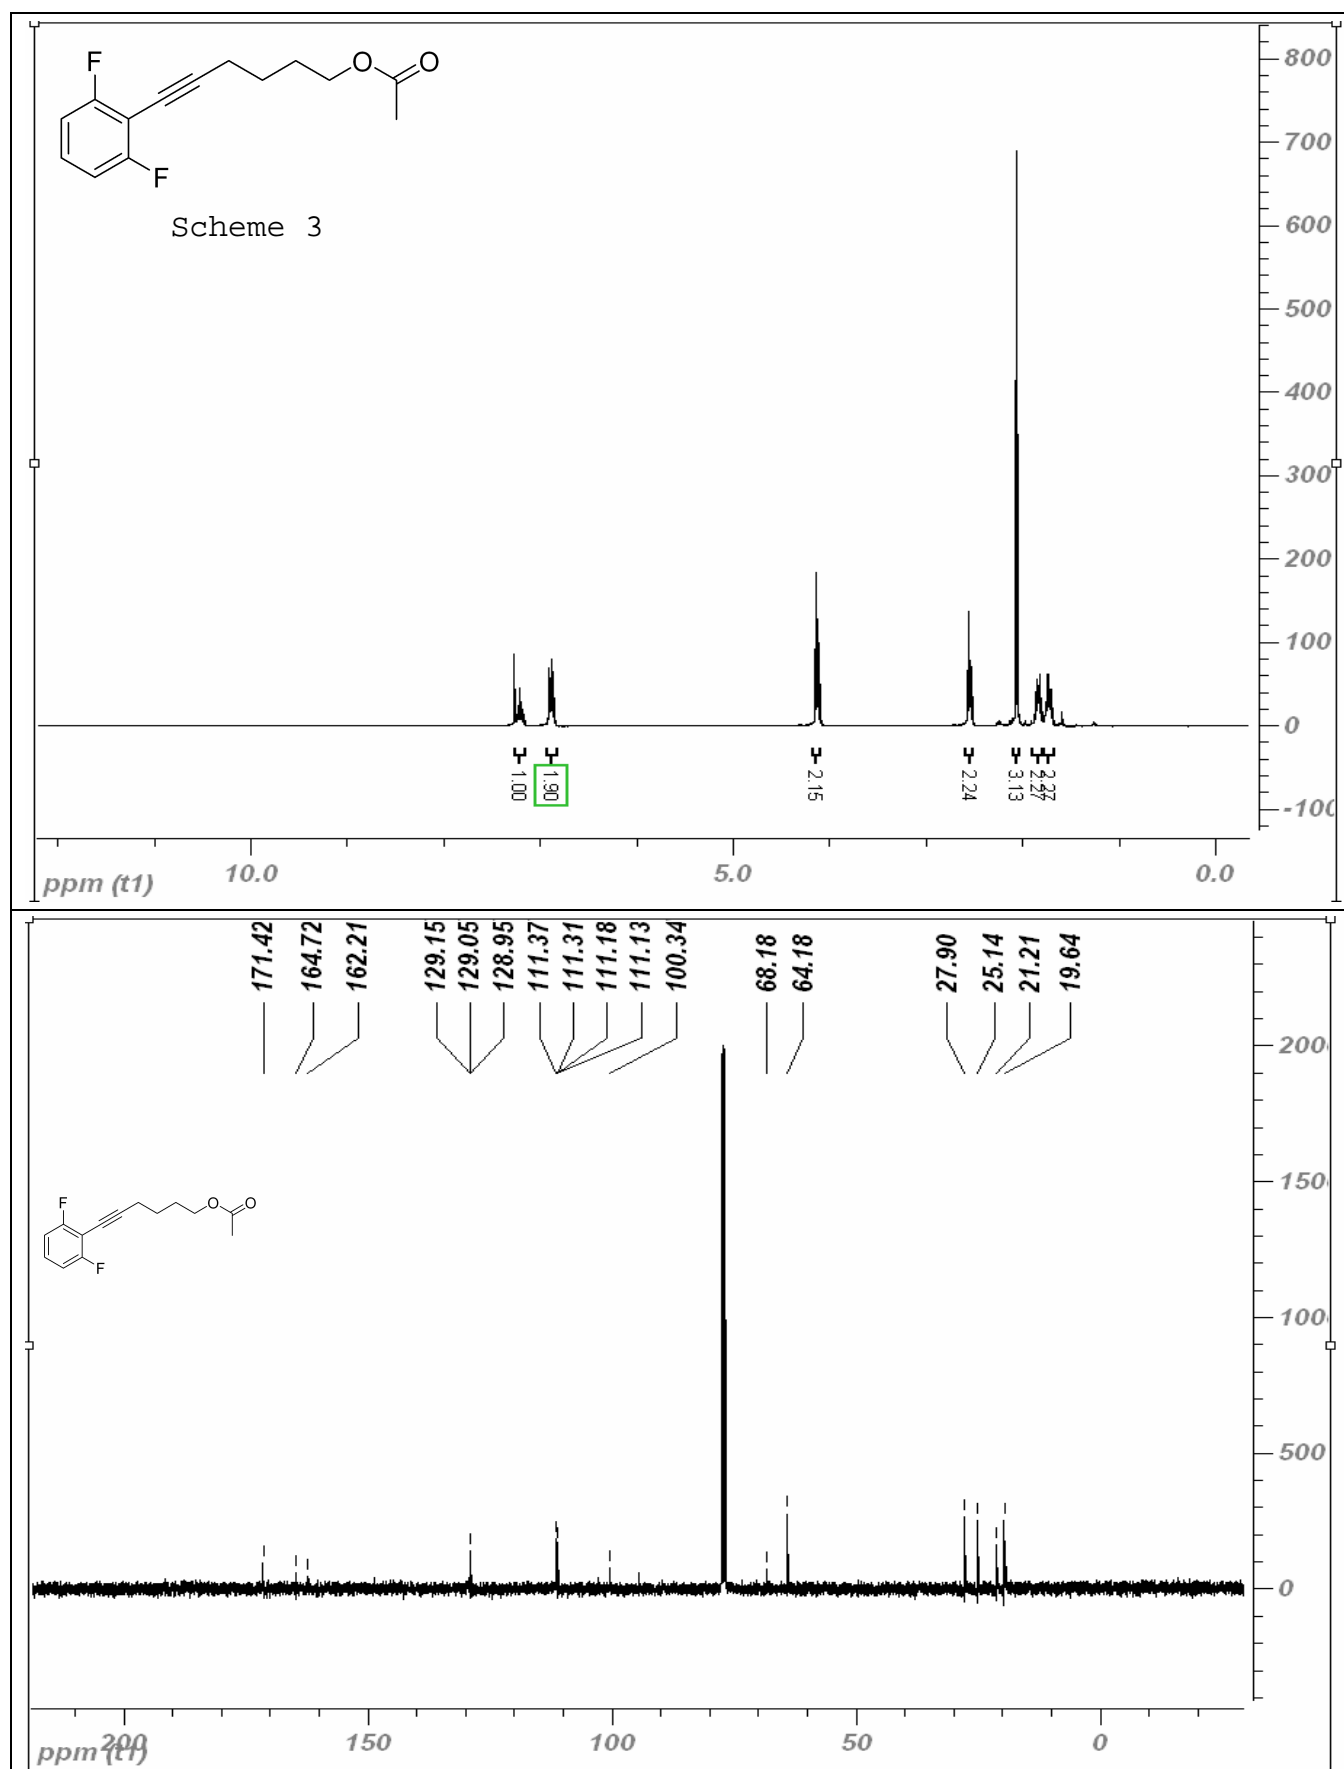

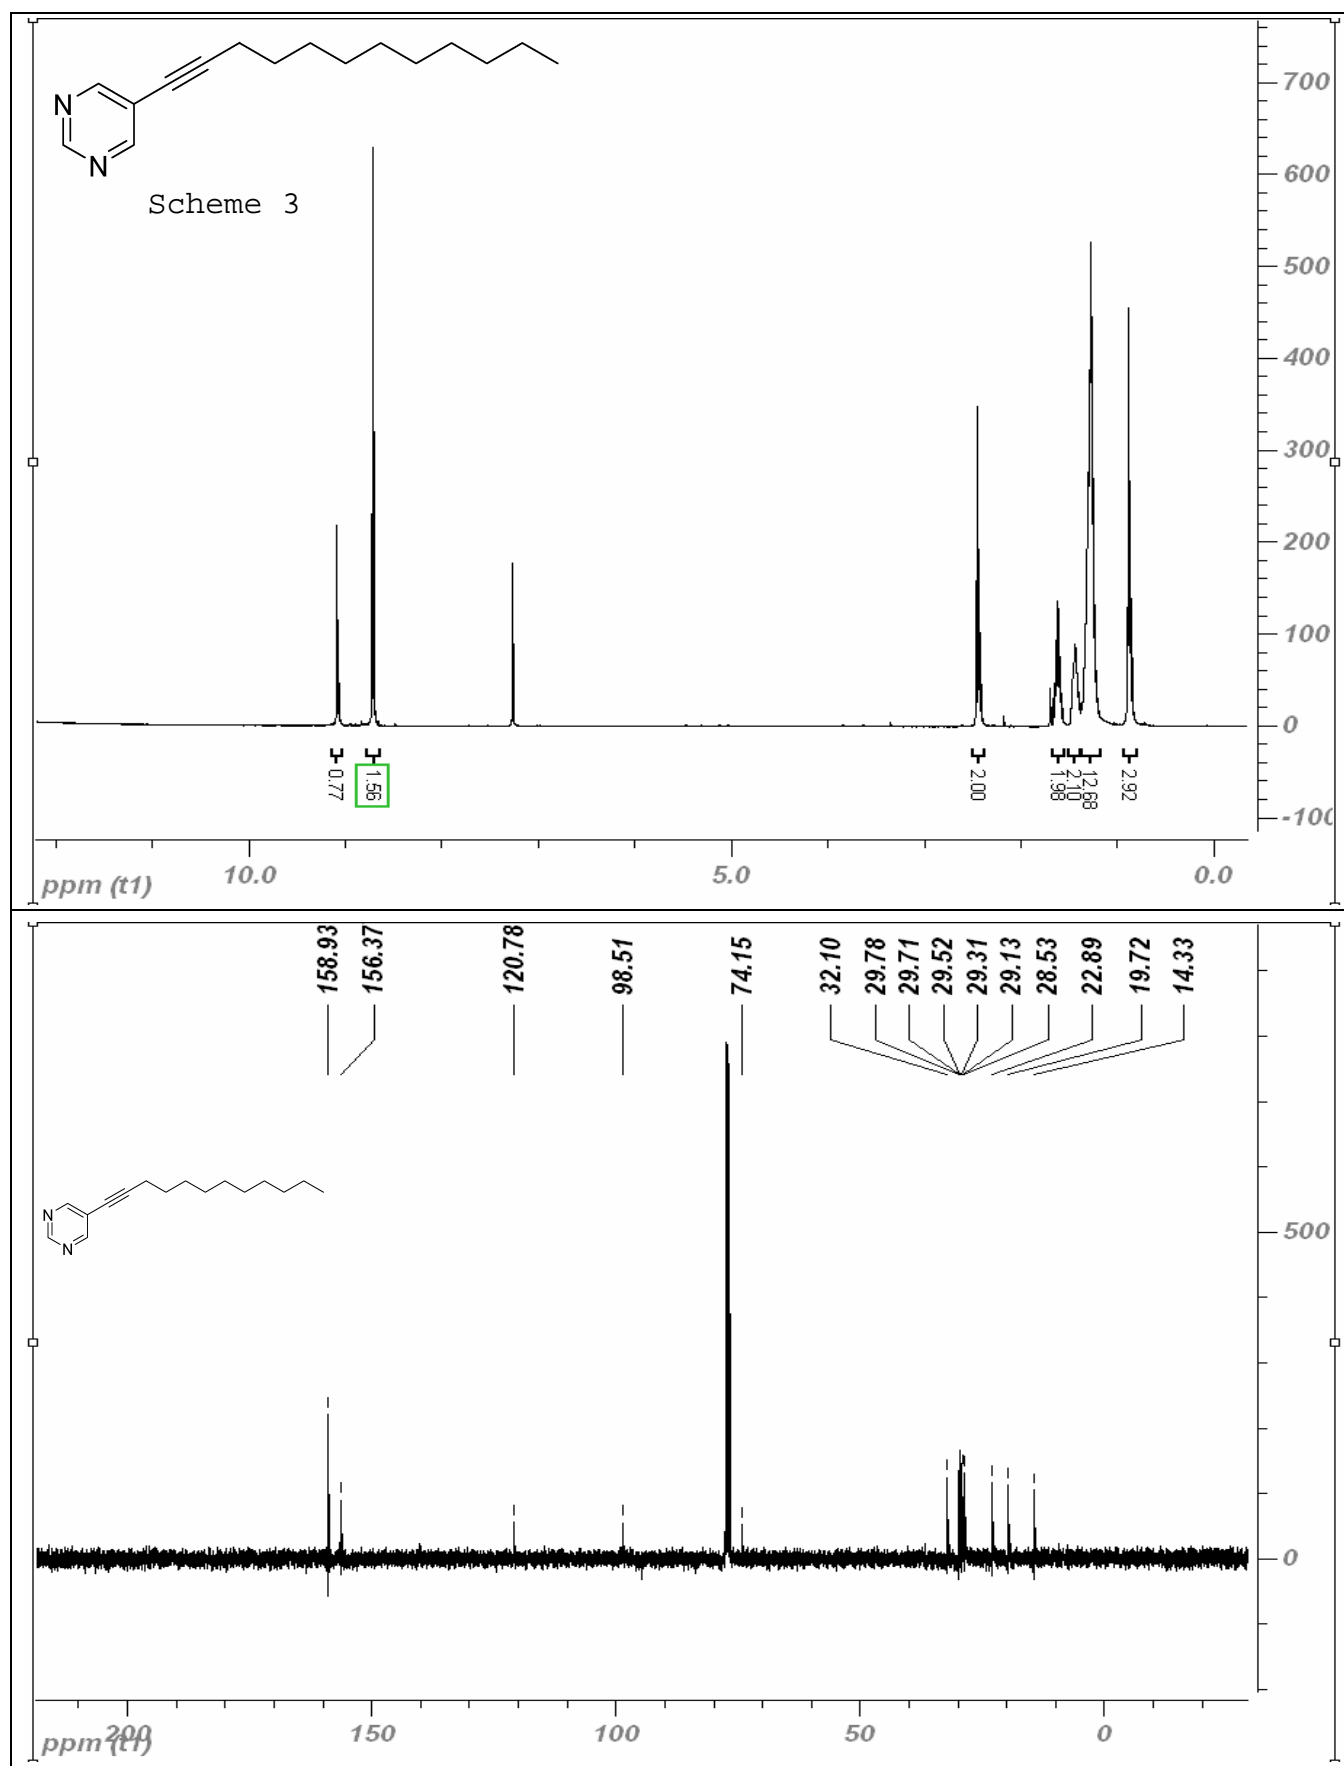

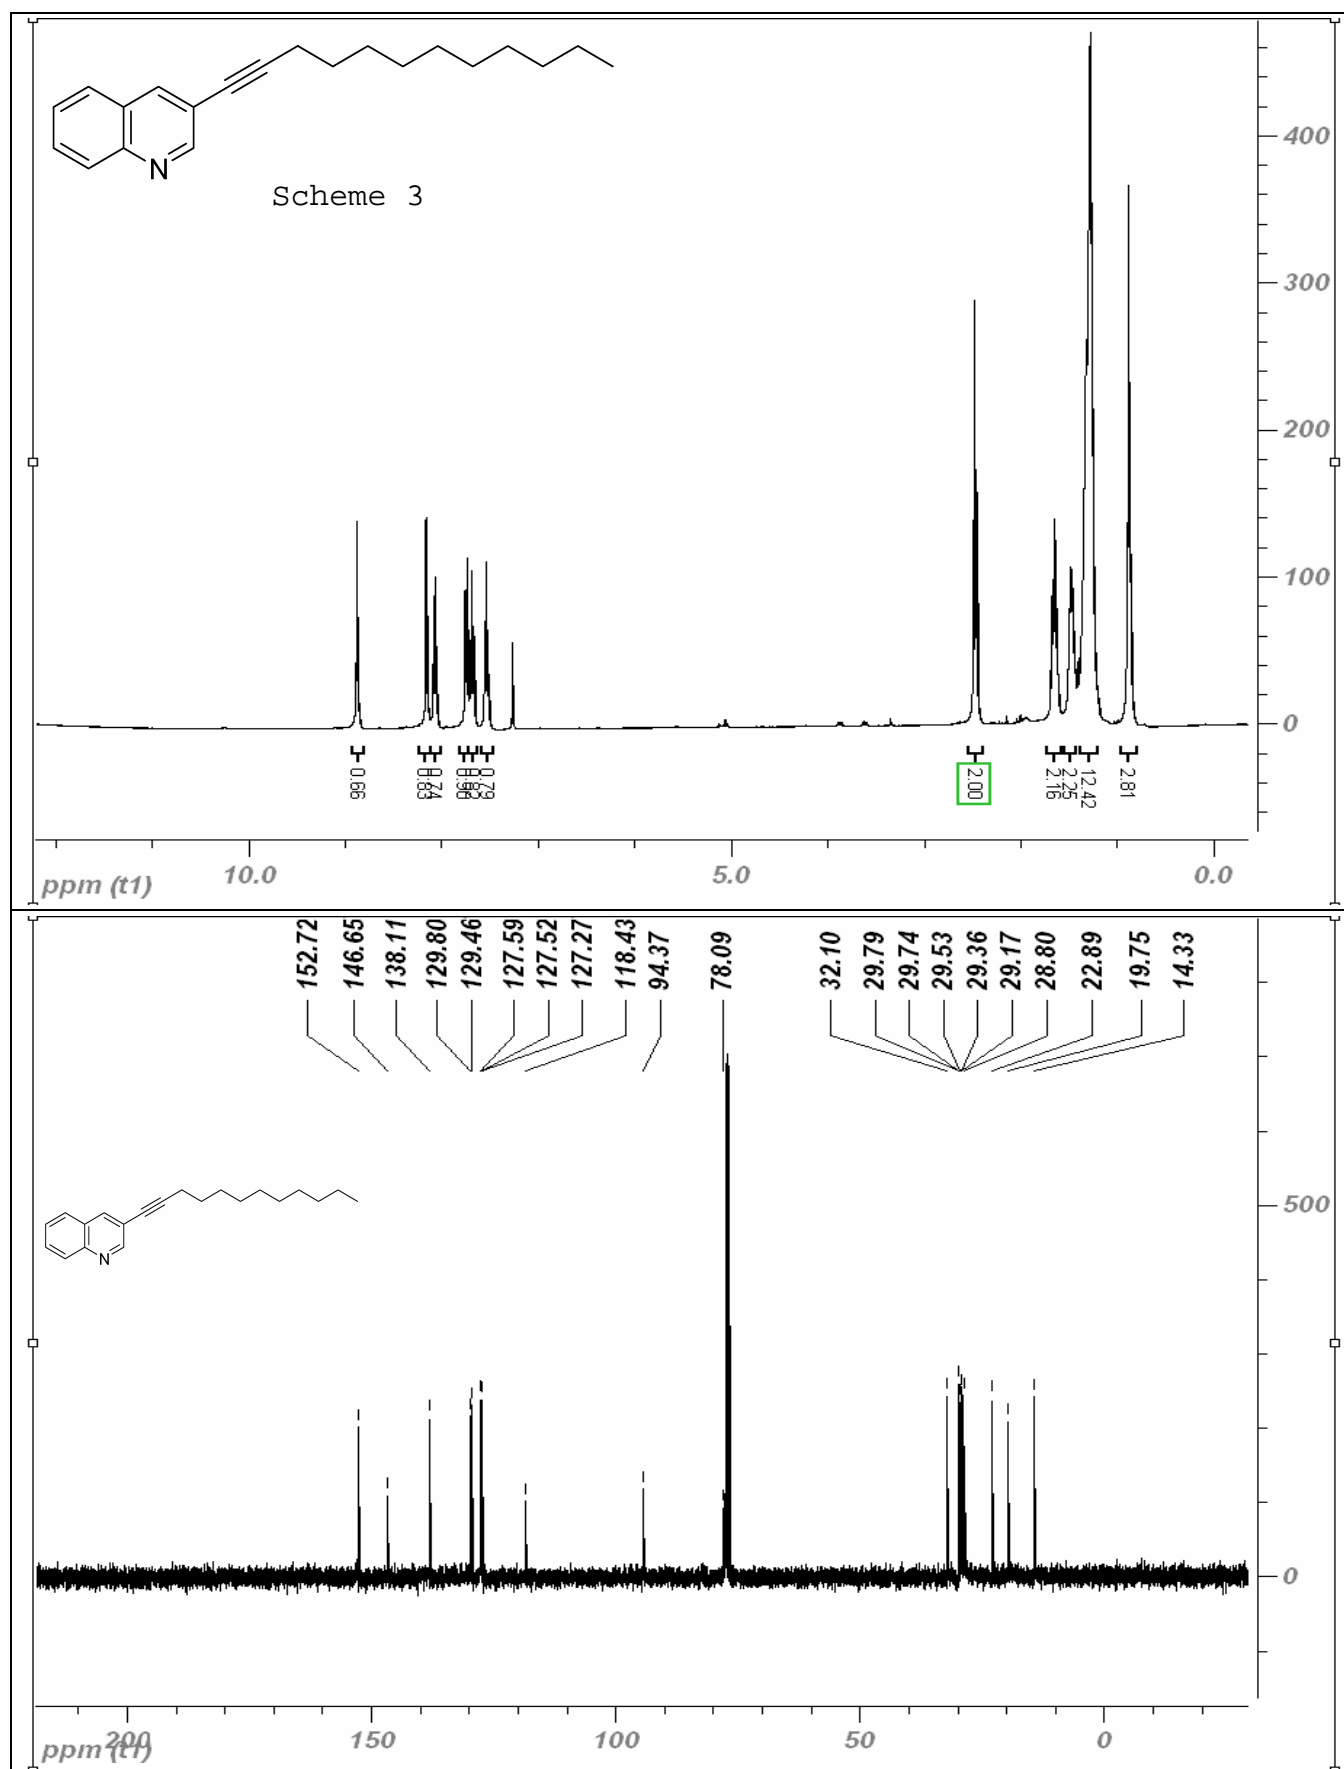

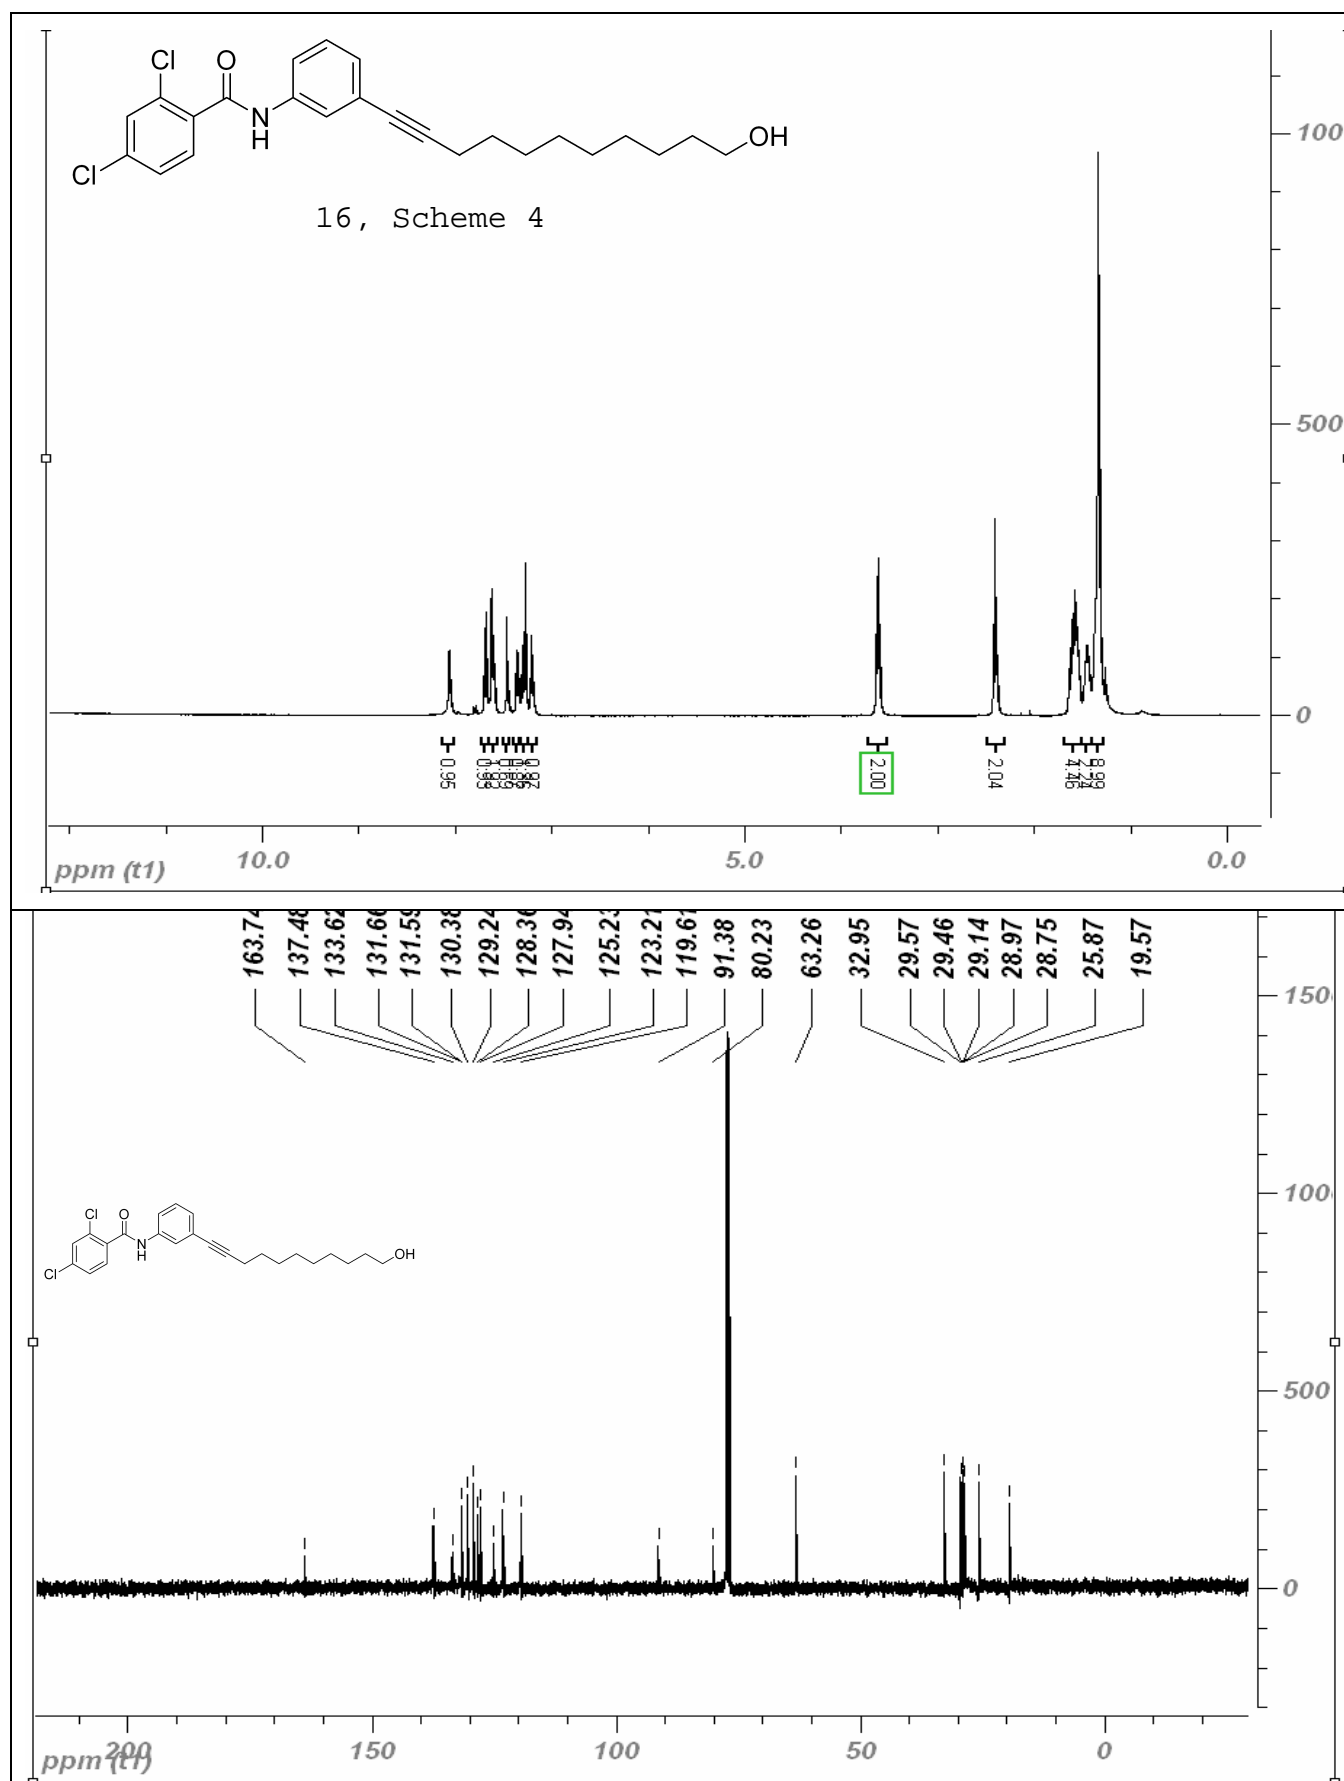

Supplement: Supplementary file 1 [file 4614967]
